# Supplementary material
Source: PubMed Central journal article supplement (PMC8564316)
Supplement: mmc3.pdf [file mmc3.pdf]

# Supplementary material S2

## MRI sequence parameters

This document reports the full set of MRI sequence parameters used for both vendors:

- vendor 1: 3T Philips Achieva, page 1;
- vendor 2: 3T Siemens Prisma, page 54.

### Vendor 1 (3T Philips Achieva)

\*\*\*\*\* 3D FFE T2\*-weighted anatomical \*\*\*\*\*

Multi-transmit = "yes";  
Active channels = "both";  
Nucleus = "H1";  
Coil selection = "SENSE-NV-16";  
element selection = "HNACPC";  
connection = "d";  
Dual coil = "no";  
CLEAR = "yes";  
body tuned = "no";  
FOV RL (mm) = 180;  
AP (mm) = 240;  
FH (mm) = 60;  
Voxel size RL (mm) = 0.75;  
AP (mm) = 0.75;  
FH (mm) = 5;  
Recon voxel size (mm) = 0.75;  
Fold-over suppression = "yes";  
Slice oversampling = "default";  
RF select. FOS = "no";  
Reconstruction matrix = 320;  
SENSE = "no";  
k-t BLAST = "no";  
Overcontiguous slices = "no";  
Stacks = 1;  
slices = 12;  
slice orientation = "transverse";  
fold-over direction = "AP";  
fat shift direction = "L";  
Stack Offc. AP (P=+mm) = -0.332532346;  
RL (L=+mm) = 2.41664815;  
FH (H=+mm) = 9.80785444e-007;  
Ang. AP (deg) = 0;  
RL (deg) = -4.24361372;

```

        FH (deg) =          0;
Chunks =                  1;
Large table movement =   "no";
PlanAlign =              "no";
REST slabs =             1;
    type =               "free";
    orientation =        "coronal";
    thickness (mm) =     80;
Rest Offc. AP (P=+mm) =  -104.381271;
    RL (L=+mm) =   -15.0501671;
    FH (H=+mm) =   15.2842817;
    Ang. AP (deg) =    0;
    RL (deg) =   -0.0405622572;
    FH (deg) =    0;
power =                  "1";
Shim Size AP (mm) =     54.6583862;
    RL (mm) =         56.4545441;
    FH (mm) =         80;
    Offc. AP (P=+mm) =  -0.595884502;
    RL (L=+mm) =    2.29769874;
    FH (H=+mm) =    0.0195419118;
    Ang. AP (deg) =    0;
    RL (deg) =   -4.24361372;
    FH (deg) =    0;
Catheter tracking =      "no";
Interactive positioning = "no";
Allow table movement =  "no";
Patient position =      "head first";
    orientation =        "supine";
Scan type =             "Imaging";
Scan mode =             "3D";
    technique =         "FFE";
    loop order =        "zy_order";
Contrast enhancement =  "no";
Acquisition mode =     "cartesian";
Fast Imaging mode =    "none";
    3D non-selective =  "no";
Echoes =               1;
    partial echo =      "yes";
    shifted echo =      "no";
TE =                   "shortest";
Flip angle (deg) =     7;
TR =                   "shortest";
Halfscan =             "no";
Water-fat shift =     "maximum";
RF Shims =             "adaptive";
Shim =                 "PB-volume";

```

ShimAlign = "yes";  
 mDIXON = "no";  
 Fat suppression = "ProSet";  
 pulse type = "1331";  
 Water suppression = "no";  
 MTC = "no";  
 Research prepulse = "no";  
 Diffusion mode = "no";  
 Elastography mode = "no";  
 SAR mode = "high";  
 B1 mode = "default";  
 SAR Patient data = "auto";  
 PNS mode = "low";  
 Gradient mode = "default";  
 SofTone mode = "no";  
 Cardiac synchronization = "no";  
 Heart rate > 250 bpm = "no";  
 Respiratory compensation = "no";  
 Navigator respiratory comp = "no";  
 Flow compensation = "yes";  
 fMRI echo stabilisation = "no";  
 NSA = 3;  
 SMART = "yes";  
 Angio / Contrast enh. = "no";  
 Quantitative flow = "no";  
 Manual start = "no";  
 Dynamic study = "no";  
 Arterial Spin labeling = "no";  
 Preparation phases = "auto";  
 Interactive F0 = "no";  
 SmartPlan survey = "no";  
 B0 field map = "no";  
 B1 field map = "no";  
 MIP/MPR = "no";  
 Images = " M", (3) " no";  
 Autoview image = " M";  
 Calculated images = (4) " no";  
 Reference tissue = "Skeletal muscle";  
 Preset window contrast = "hard";  
 Reconstruction mode = "real time";  
 Save raw data = "no";  
 Hardcopy protocol = "no";  
 Ringing filtering = "rectangular";  
 Geometry correction = "default";  
 Elliptical k-space shutter = "default";  
 IF\_info\_seperator = 1634755923;  
 Total scan duration = "03:29.5";

Rel. signal level (%) = 100;  
 Act. TR/TE (ms) = "20 / 4.1";  
 ACQ matrix M x P = "240 x 320";  
 ACQ voxel MPS (mm) = "0.75 / 0.75 / 5.00";  
 REC voxel MPS (mm) = "0.75 / 0.75 / 5.00";  
 Scan percentage (%) = 100;  
 Act. WFS (pix) / BW (Hz) = "3.026 / 143.5";  
 Min. WFS (pix) / Max. BW (Hz) = "0.648 / 670.6";  
 SAR / local torso = "< 100 %";  
 Whole body / level = "< 1.6 W/kg / normal";  
 B1 rms = "2.18 uT / 87 %";  
 PNS / level = "57 % / normal";  
 Sound Pressure Level (dB) = 17.3657188;

\*\*\*\*\* B0 field map \*\*\*\*\*

Multi-transmit = "no";  
 Nucleus = "H1";  
 Coil selection = "Q-Body";  
   element selection = "12";  
 Dual coil = "no";  
 Homogeneity correction = "none";  
 FOV    RL (mm) = 215;  
       AP (mm) = 206.041672;  
       FH (mm) = 60;  
 Voxel size   RL (mm) = 2.25;  
           AP (mm) = 2.25;  
           FH (mm) = 5;  
 Recon voxel size (mm) = 2.23958325;  
 Fold-over suppression = "no";  
 Slice oversampling = "default";  
 RF select. FOS = "no";  
 Reconstruction matrix = 96;  
 SENSE = "no";  
 k-t BLAST = "no";  
 Overcontiguous slices = "no";  
 Stacks = 1;  
   slices = 12;  
   slice orientation = "transverse";  
   fold-over direction = "AP";  
   fat shift direction = "L";  
 Stack Offc. AP (P=+mm) = -0.332532346;  
       RL (L=+mm) = 2.41664815;  
       FH (H=+mm) = 9.80785444e-007;  
 Ang. AP (deg) = 0;  
       RL (deg) = -4.24361372;

```

        FH (deg) =          0;
Chunks =                  1;
Large table movement =   "no";
PlanAlign =              "no";
REST slabs =             0;
Shim Size AP (mm) =     54.6583862;
        RL (mm) =         56.4545441;
        FH (mm) =         80;
    Offc. AP (P=+mm) =   -0.595884502;
        RL (L=+mm) =     2.29769874;
        FH (H=+mm) =     0.0195419118;
    Ang. AP (deg) =       0;
        RL (deg) =       -4.24361372;
        FH (deg) =       0;
Catheter tracking =     "no";
Interactive positioning = "no";
Allow table movement = "no";
Patient position =     "head first";
    orientation =       "supine";
Scan type =            "Imaging";
Scan mode =            "3D";
    technique =        "FFE";
    loop order =       "zy_order";
Contrast enhancement = "T1";
Acquisition mode =    "cartesian";
Fast Imaging mode =   "none";
    3D non-selective = "no";
Echoes =              1;
    partial echo =     "no";
    shifted echo =     "no";
TE =                  "in-phase";
    (ms) =             6.90782404;
Flip angle (deg) =    25;
TR =                  "user defined";
    (ms) =             50;
Halfscan =           "no";
Water-fat shift =    "maximum";
Shim =               "PB-volume";
ShimAlign =          "yes";
mDIXON =             "no";
Fat suppression =    "no";
Water suppression =  "no";
MTC =                "no";
Research prepulse =  "no";
Diffusion mode =     "no";
Elastography mode =  "no";
SAR mode =           "high";

```

B1 mode = "default";  
 SAR Patient data = "auto";  
 PNS mode = "high";  
 Gradient mode = "default";  
 SofTone mode = "no";  
 Cardiac synchronization = "no";  
 Heart rate > 250 bpm = "no";  
 Respiratory compensation = "no";  
 Navigator respiratory comp = "no";  
 Flow compensation = "no";  
 fMRI echo stabilisation = "no";  
 NSA = 1;  
 Angio / Contrast enh. = "no";  
 Quantitative flow = "no";  
 Manual start = "no";  
 Dynamic study = "no";  
 Arterial Spin labeling = "no";  
 Preparation phases = "auto";  
 Interactive F0 = "no";  
 SmartPlan survey = "no";  
 B0 field map = "yes";  
   delta TE (ms) = 2.29999995;  
 B1 field map = "no";  
 MIP/MPR = "no";  
 Images = " M", " R", " I", " P";  
 Autoview image = " M";  
 Calculated images = (4) " no";  
 Reference tissue = "Skeletal muscle";  
 Preset window contrast = "soft";  
 Reconstruction mode = "real time";  
 Save raw data = "no";  
 Hardcopy protocol = "no";  
 Ringing filtering = "rectangular";  
 Geometry correction = "default";  
 Elliptical k-space shutter = "default";  
 IF\_info\_seperator = 1634755923;  
 Total scan duration = "01:39.7";  
 Rel. signal level (%) = 100;  
 Act. TR/TE (ms) = "50 / 6.9";  
 ACQ matrix M x P = "96 x 92";  
 ACQ voxel MPS (mm) = "2.24 / 2.24 / 5.00";  
 REC voxel MPS (mm) = "2.24 / 2.24 / 5.00";  
 Scan percentage (%) = 100;  
 Act. WFS (pix) / BW (Hz) = "2.862 / 151.7";  
 Min. WFS (pix) / Max. BW (Hz) = "0.380 / 1144.3";  
 Min. TR/TE (ms) = "15 / 3.9";  
 SAR / local torso = "< 15 %";

Whole body / level = "< 0.1 W/kg / normal";  
B1 rms = "0.63 uT";  
PNS / level = "16 % / normal";  
Sound Pressure Level (dB) = 1.37427807;

\*\*\*\*\* B1 field map \*\*\*\*\*

Multi-transmit = "yes";  
Active channels = "both";  
Nucleus = "H1";  
Coil selection = "SENSE-NV-16";  
element selection = "HNACPC";  
connection = "d";  
Dual coil = "no";  
CLEAR = "yes";  
body tuned = "no";  
FOV RL (mm) = 215;  
AP (mm) = 206.041672;  
FH (mm) = 60;  
Voxel size RL (mm) = 2.25;  
AP (mm) = 2.25;  
FH (mm) = 5;  
Recon voxel size (mm) = 2.23958325;  
Fold-over suppression = "no";  
Slice oversampling = "default";  
RF select. FOS = "no";  
Reconstruction matrix = 96;  
SENSE = "no";  
k-t BLAST = "no";  
Overcontiguous slices = "yes";  
Stacks = 1;  
slices = 12;  
slice orientation = "transverse";  
fold-over direction = "AP";  
fat shift direction = "L";  
Stack Offc. AP (P=+mm) = -0.332532346;  
RL (L=+mm) = 2.41664815;  
FH (H=+mm) = 9.80785444e-007;  
Ang. AP (deg) = 0;  
RL (deg) = -4.24361372;  
FH (deg) = 0;  
Chunks = 1;  
Large table movement = "no";  
PlanAlign = "no";  
REST slabs = 0;  
Shim Size AP (mm) = 54.6583862;

RL (mm) = 56.4545441;  
 FH (mm) = 80;  
 Offc. AP (P=+mm) = -0.595884502;  
 RL (L=+mm) = 2.29769874;  
 FH (H=+mm) = 0.0195419118;  
 Ang. AP (deg) = 0;  
 RL (deg) = -4.24361372;  
 FH (deg) = 0;  
 Catheter tracking = "no";  
 Interactive positioning = "no";  
 Allow table movement = "no";  
 Patient position = "head first";  
 orientation = "supine";  
 Scan type = "Imaging";  
 Scan mode = "3D";  
 technique = "FFE";  
 loop order = "zy\_order";  
 Contrast enhancement = "T1";  
 Acquisition mode = "cartesian";  
 Fast Imaging mode = "none";  
 3D non-selective = "no";  
 Echoes = 1;  
 partial echo = "no";  
 shifted echo = "no";  
 TE = "shortest";  
 Flip angle (deg) = 60;  
 TR = "user defined";  
 (ms) = 30;  
 Halfscan = "no";  
 Water-fat shift = "maximum";  
 RF Shims = "adaptive";  
 Shim = "PB-volume";  
 ShimAlign = "yes";  
 mDIXON = "no";  
 Fat suppression = "no";  
 Water suppression = "no";  
 MTC = "no";  
 Research prepulse = "no";  
 Diffusion mode = "no";  
 Elastography mode = "no";  
 SAR mode = "high";  
 B1 mode = "default";  
 SAR Patient data = "auto";  
 PNS mode = "high";  
 Gradient mode = "default";  
 SofTone mode = "no";  
 Cardiac synchronization = "no";



Heart rate > 250 bpm = "no";  
 Respiratory compensation = "no";  
 Navigator respiratory comp = "no";  
 Flow compensation = "no";  
 fMRI echo stabilisation = "no";  
 NSA = 1;  
 Angio / Contrast enh. = "no";  
 Quantitative flow = "no";  
 Manual start = "no";  
 Dynamic study = "no";  
 Arterial Spin labeling = "no";  
 Preparation phases = "auto";  
 Interactive F0 = "select";  
 SmartPlan survey = "no";  
 B0 field map = "no";  
 B1 field map = "yes";  
   field map technique = "dual TR";  
   TR extension = 120;  
   selective = "yes";  
   grad spoil factor = 10;  
 MIP/MPR = "no";  
 Images = " M", (3) " no";  
 Autoview image = " M";  
 Calculated images = " B1", (3) " no";  
 Reference tissue = "Grey matter";  
 Preset window contrast = "soft";  
 Reconstruction mode = "real time";  
 Save raw data = "no";  
 Hardcopy protocol = "no";  
 Ringing filtering = "rectangular";  
 Geometry correction = "default";  
 Elliptical k-space shutter = "default";  
 IF\_info\_seperator = 1634755923;  
 Total scan duration = "01:39.9";  
 Rel. signal level (%) = 100;  
 Act. TR/TE (ms) = "30 / 2.5";  
 ACQ matrix M x P = "96 x 92";  
 ACQ voxel MPS (mm) = "2.24 / 2.24 / 10.0";  
 REC voxel MPS (mm) = "2.24 / 2.24 / 5.00";  
 Scan percentage (%) = 100;  
 Act. WFS (pix) / BW (Hz) = "1.013 / 428.9";  
 Min. WFS (pix) / Max. BW (Hz) = "0.217 / 2002.5";  
 Min. TR/TE (ms) = "11 / 2.5";  
 SAR / local torso = "< 11 %";  
 Whole body / level = "< 0.2 W/kg / normal";  
 B1 rms = "0.73 uT / 10 %";  
 PNS / level = "53 % / normal";

Sound Pressure Level (dB) = 11.9344177;

\*\*\*\*\* Inversion recovery ZOOM EPI \*\*\*\*\*

Multi-transmit = "yes";  
Active channels = "both";  
Nucleus = "H1";  
Coil selection = "SENSE-NV-16";  
element selection = "HNACPC";  
connection = "d";  
Dual coil = "no";  
CLEAR = "yes";  
body tuned = "no";  
FOV RL (mm) = 64;  
AP (mm) = 48;  
FH (mm) = 60;  
Voxel size RL (mm) = 1;  
AP (mm) = 1;  
Slice thickness (mm) = 5;  
Recon voxel size (mm) = 1;  
Small FOV imaging = "yes";  
OVS = "no";  
Reconstruction matrix = 64;  
SENSE = "no";  
k-t BLAST = "no";  
Stacks = 1;  
type = "parallel";  
slices = 12;  
slice gap = "user defined";  
gap (mm) = 0;  
slice orientation = "transverse";  
fold-over direction = "AP";  
fat shift direction = "P";  
Stack Offc. AP (P=+mm) = -0.332532346;  
RL (L=+mm) = 2.41664815;  
FH (H=+mm) = 9.80785444e-007;  
Ang. AP (deg) = 0;  
RL (deg) = -4.24361372;  
FH (deg) = 0;  
Minimum number of packages = 3;  
Slice scan order = "interleaved";  
Large table movement = "no";  
PlanAlign = "no";  
REST slabs = 0;  
Shim Size AP (mm) = 54.6583862;  
RL (mm) = 56.4545441;

```

    FH (mm) = 80;
    Offc. AP (P=+mm) = -0.595884502;
    RL (L=+mm) = 2.29769874;
    FH (H=+mm) = 0.0195419118;
    Ang. AP (deg) = 0;
    RL (deg) = -4.24361372;
    FH (deg) = 0;
    Catheter tracking = "no";
    Interactive positioning = "no";
    Allow table movement = "no";
    Patient position = "head first";
    orientation = "supine";
    Scan type = "Imaging";
    Scan mode = "MS";
    technique = "SE";
    Modified SE = "no";
    Acquisition mode = "cartesian";
    Fast Imaging mode = "EPI";
    shot mode = "single-shot";
    Echoes = 1;
    partial echo = "no";
    TE = "shortest";
    Flip angle (deg) = 90;
    TR = "shortest";
    Halfscan = "yes";
    factor = 0.600000024;
    Water-fat shift = "minimum";
    shared inversion prepulse = "yes";
    Number of TIs = 3;
    Inversion times = 100, 900,
    1700, (12) 0;
    package slices shuffling = "yes";
    RF Shims = "adaptive";
    Shim = "PB-volume";
    ShimAlign = "yes";
    mDIXON = "no";
    Fat suppression = "SPIR";
    strength = "strong";
    frequency offset = "default";
    Water suppression = "no";
    Grad. rev. offres. supp. = "yes";
    BB pulse = "no";
    MTR optimal = "no";
    MTC = "no";
    Research prepulse = "no";
    Diffusion mode = "no";
    Elastography mode = "no";

```

```

SAR mode = "high";
B1 mode = "default";
SAR Patient data = "auto";
PNS mode = "high";
Gradient mode = "enhanced";
SoftTone mode = "no";
Cardiac synchronization = "no";
Heart rate > 250 bpm = "no";
Respiratory compensation = "no";
Navigator respiratory comp = "no";
Flow compensation = "yes";
Temporal slice spacing = "user defined";
    Slice interval = 200;
Package recovery time = "user defined";
    Recovery time = 6000;
NSA = 1;
Manual start = "no";
Dynamic study = "individual";
    dyn scans = 12;
    recon multiplier = 1;
    dyn scan times = "shortest";
    FOV time mode = "default";
    dummy scans = 0;
    immediate subtraction = "no";
    fast next scan = "no";
    synch. ext. device = "no";
    Noise scan = "no";
    dyn stabilization = "no";
    prospect. motion corr. = "no";
Keyhole = "no";
Arterial Spin labeling = "no";
Preparation phases = "auto";
Interactive F0 = "no";
SmartPlan survey = "no";
B0 field map = "no";
B1 field map = "no";
MIP/MPR = "no";
Images = " M", " R", " I", " no";
Autoview image = " M";
Calculated images = (4) " no";
Reference tissue = "Grey matter";
EPI 2D phase correction = "no";
Preset window contrast = "soft";
Reconstruction mode = "immediate";
Save raw data = "yes";
Hardcopy protocol = "no";
Ringing filtering = "rectangular";

```

Geometry correction = "default";  
 IF\_info\_seperator = 1634755923;  
 Total scan duration = "04:21.5";  
 Rel. signal level (%) = 100;  
 Act. TR (ms) = "6705";  
 Act. TE (ms) = "24";  
 Dyn. scan time = "00:20.1";  
 ACQ matrix M x P = "64 x 47";  
 ACQ voxel MPS (mm) = "1.00 / 1.01 / 5.00";  
 REC voxel MPS (mm) = "1.00 / 1.00 / 5.00";  
 Scan percentage (%) = 98.6111145;  
 Packages = 3;  
 Min. slice gap (mm) = 0;  
 EPI factor = 71;  
 WFS (pix) / BW (Hz) = "30.973 / 14.0";  
 BW in EPI freq. dir. (Hz) = "2100.3";  
 Full flow comp. = "no";  
 SAR / local torso = "< 4 %";  
 Whole body / level = "< 0.1 W/kg / normal";  
 B1 rms = "0.45 uT / 4 %";  
 PNS / level = "91 % / 1st level";  
 Sound Pressure Level (dB) = 13.1894379;

\*\*\*\*\* Multi-TE ZOOM EPI, 1<sup>st</sup> TE \*\*\*\*\*

Multi-transmit = "yes";  
   Active channels = "both";  
 Nucleus = "H1";  
 Coil selection = "SENSE-NV-16";  
   element selection = "HNACPC";  
   connection = "d";  
 Dual coil = "no";  
 CLEAR = "yes";  
   body tuned = "no";  
 FOV    RL (mm) = 64;  
       AP (mm) = 48;  
       FH (mm) = 60;  
 Voxel size   RL (mm) = 1;  
           AP (mm) = 1;  
 Slice thickness (mm) = 5;  
 Recon voxel size (mm) = 1;  
 Small FOV imaging = "yes";  
   OVS = "no";  
 Reconstruction matrix = 64;  
 SENSE = "no";  
 k-t BLAST = "no";

```

Stacks = 1;
  type = "parallel";
  slices = 12;
  slice gap = "user defined";
    gap (mm) = 0;
  slice orientation = "transverse";
  fold-over direction = "AP";
  fat shift direction = "P";
Stack Offc. AP (P=+mm) = -0.332532346;
  RL (L=+mm) = 2.41664815;
  FH (H=+mm) = 9.80785444e-007;
  Ang. AP (deg) = 0;
  RL (deg) = -4.24361372;
  FH (deg) = 0;
Minimum number of packages = 3;
Slice scan order = "interleaved";
Large table movement = "no";
PlanAlign = "no";
REST slabs = 0;
Shim Size AP (mm) = 54.6583862;
  RL (mm) = 56.4545441;
  FH (mm) = 80;
  Offc. AP (P=+mm) = -0.595884502;
  RL (L=+mm) = 2.29769874;
  FH (H=+mm) = 0.0195419118;
  Ang. AP (deg) = 0;
  RL (deg) = -4.24361372;
  FH (deg) = 0;
Catheter tracking = "no";
Interactive positioning = "no";
Allow table movement = "no";
Patient position = "head first";
  orientation = "supine";
Scan type = "Imaging";
Scan mode = "MS";
  technique = "SE";
Modified SE = "no";
Acquisition mode = "cartesian";
Fast Imaging mode = "EPI";
  shot mode = "single-shot";
Echoes = 1;
  partial echo = "no";
TE = "user defined";
  (ms) = 25;
Flip angle (deg) = 90;
TR = "user defined";
  (ms) = 4000;

```

Halfscan = "yes";  
factor = 0.600000024;  
Water-fat shift = "minimum";  
shared inversion prepulse = "no";  
RF Shims = "adaptive";  
Shim = "PB-volume";  
ShimAlign = "yes";  
mDIXON = "no";  
Fat suppression = "SPIR";  
strength = "strong";  
frequency offset = "default";  
Water suppression = "no";  
Grad. rev. offres. supp. = "no";  
BB pulse = "no";  
MTR optimal = "no";  
MTC = "no";  
Research prepulse = "no";  
Diffusion mode = "no";  
Elastography mode = "no";  
SAR mode = "high";  
B1 mode = "default";  
SAR Patient data = "auto";  
PNS mode = "high";  
Gradient mode = "enhanced";  
SofTone mode = "no";  
Cardiac synchronization = "no";  
Heart rate > 250 bpm = "no";  
Respiratory compensation = "no";  
Navigator respiratory comp = "no";  
Flow compensation = "no";  
Temporal slice spacing = "default";  
Package recovery time = "default";  
NSA = 1;  
Manual start = "no";  
Dynamic study = "no";  
Arterial Spin labeling = "no";  
Preparation phases = "auto";  
Interactive F0 = "no";  
SmartPlan survey = "no";  
B0 field map = "no";  
B1 field map = "no";  
MIP/MPR = "no";  
Images = " M", " R", " I", " no";  
Autoview image = " M";  
Calculated images = (4) " no";  
Reference tissue = "White matter";  
EPI 2D phase correction = "no";

```

Preset window contrast = "soft";
Reconstruction mode = "immediate";
Save raw data = "yes";
Hardcopy protocol = "no";
Ringing filtering = "rectangular";
Geometry correction = "default";
IF_info_seperator = 1634755923;
Total scan duration = "00:24.0";
Rel. signal level (%) = 100;
Act. TR (ms) = "4000";
Act. TE (ms) = "25";
ACQ matrix M x P = "64 x 47";
ACQ voxel MPS (mm) = "1.00 / 1.01 / 5.00";
REC voxel MPS (mm) = "1.00 / 1.00 / 5.00";
Scan percentage (%) = 98.61111145;
Packages = 3;
Min. slice gap (mm) = 0;
Optimal slices = 4;
EPI factor = 71;
WFS (pix) / BW (Hz) = "30.973 / 14.0";
BW in EPI freq. dir. (Hz) = "2100.3";
Min. TR (ms) = "316";
SAR / local torso = "< 5 %";
Whole body / level = "< 0.1 W/kg / normal";
B1 rms = "0.48 uT / 4 %";
PNS / level = "91 % / 1st level";
Sound Pressure Level (dB) = 12.1325197;

```

\*\*\*\*\* Multi-TE ZOOM EPI, 2<sup>nd</sup> TE \*\*\*\*\*

```

Multi-transmit = "yes";
  Active channels = "both";
Nucleus = "H1";
Coil selection = "SENSE-NV-16";
  element selection = "HNACPC";
  connection = "d";
Dual coil = "no";
CLEAR = "yes";
  body tuned = "no";
FOV    RL (mm) = 64;
      AP (mm) = 48;
      FH (mm) = 60;
Voxel size  RL (mm) = 1;
          AP (mm) = 1;
Slice thickness (mm) = 5;
Recon voxel size (mm) = 1;

```



```

Small FOV imaging = "yes";
  OVS = "no";
Reconstruction matrix = 64;
SENSE = "no";
k-t BLAST = "no";
Stacks = 1;
  type = "parallel";
  slices = 12;
  slice gap = "user defined";
    gap (mm) = 0;
  slice orientation = "transverse";
  fold-over direction = "AP";
  fat shift direction = "P";
Stack Offc. AP (P=+mm) = -0.332532346;
  RL (L=+mm) = 2.41664815;
  FH (H=+mm) = 9.80785444e-007;
  Ang. AP (deg) = 0;
  RL (deg) = -4.24361372;
  FH (deg) = 0;
Minimum number of packages = 3;
Slice scan order = "interleaved";
Large table movement = "no";
PlanAlign = "no";
REST slabs = 0;
Shim Size AP (mm) = 54.6583862;
  RL (mm) = 56.4545441;
  FH (mm) = 80;
  Offc. AP (P=+mm) = -0.595884502;
  RL (L=+mm) = 2.29769874;
  FH (H=+mm) = 0.0195419118;
  Ang. AP (deg) = 0;
  RL (deg) = -4.24361372;
  FH (deg) = 0;
Catheter tracking = "no";
Interactive positioning = "no";
Allow table movement = "no";
Patient position = "head first";
  orientation = "supine";
Scan type = "Imaging";
Scan mode = "MS";
  technique = "SE";
Modified SE = "no";
Acquisition mode = "cartesian";
Fast Imaging mode = "EPI";
  shot mode = "single-shot";
Echoes = 1;
  partial echo = "no";

```

TE = "user defined";  
 (ms) = 40;  
 Flip angle (deg) = 90;  
 TR = "user defined";  
 (ms) = 4000;  
 Halfscan = "yes";  
 factor = 0.600000024;  
 Water-fat shift = "minimum";  
 shared inversion prepulse = "no";  
 RF Shims = "adaptive";  
 Shim = "PB-volume";  
 ShimAlign = "yes";  
 mDIXON = "no";  
 Fat suppression = "SPIR";  
 strength = "strong";  
 frequency offset = "default";  
 Water suppression = "no";  
 Grad. rev. offres. supp. = "no";  
 BB pulse = "no";  
 MTR optimal = "no";  
 MTC = "no";  
 Research prepulse = "no";  
 Diffusion mode = "no";  
 Elastography mode = "no";  
 SAR mode = "high";  
 B1 mode = "default";  
 SAR Patient data = "auto";  
 PNS mode = "high";  
 Gradient mode = "enhanced";  
 SofTone mode = "no";  
 Cardiac synchronization = "no";  
 Heart rate > 250 bpm = "no";  
 Respiratory compensation = "no";  
 Navigator respiratory comp = "no";  
 Flow compensation = "no";  
 Temporal slice spacing = "default";  
 Package recovery time = "default";  
 NSA = 1;  
 Manual start = "no";  
 Dynamic study = "no";  
 Arterial Spin labeling = "no";  
 Preparation phases = "auto";  
 Interactive F0 = "no";  
 SmartPlan survey = "no";  
 B0 field map = "no";  
 B1 field map = "no";  
 MIP/MPR = "no";

Images = " M", " R", " I", " no";  
 Autoview image = " M";  
 Calculated images = (4) " no";  
 Reference tissue = "White matter";  
 EPI 2D phase correction = "no";  
 Preset window contrast = "soft";  
 Reconstruction mode = "immediate";  
 Save raw data = "yes";  
 Hardcopy protocol = "no";  
 Ringing filtering = "rectangular";  
 Geometry correction = "default";  
 IF\_info\_seperator = 1634755923;  
 Total scan duration = "00:24.0";  
 Rel. signal level (%) = 100;  
 Act. TR (ms) = "4000";  
 Act. TE (ms) = "40";  
 ACQ matrix M x P = "64 x 47";  
 ACQ voxel MPS (mm) = "1.00 / 1.01 / 5.00";  
 REC voxel MPS (mm) = "1.00 / 1.00 / 5.00";  
 Scan percentage (%) = 98.6111145;  
 Packages = 3;  
 Min. slice gap (mm) = 0;  
 Optimal slices = 4;  
 EPI factor = 71;  
 WFS (pix) / BW (Hz) = "30.973 / 14.0";  
 BW in EPI freq. dir. (Hz) = "2100.3";  
 Min. TR (ms) = "376";  
 SAR / local torso = "< 5 %";  
 Whole body / level = "< 0.1 W/kg / normal";  
 B1 rms = "0.48 uT / 4 %";  
 PNS / level = "91 % / 1st level";  
 Sound Pressure Level (dB) = 12.6679831;

\*\*\*\*\* Multi-TE ZOOM EPI, 3<sup>rd</sup> TE \*\*\*\*\*

Multi-transmit = "yes";  
   Active channels = "both";  
 Nucleus = "H1";  
 Coil selection = "SENSE-NV-16";  
   element selection = "HNACPC";  
   connection = "d";  
 Dual coil = "no";  
 CLEAR = "yes";  
   body tuned = "no";  
 FOV    RL (mm) = 64;  
       AP (mm) = 48;

```

        FH (mm) =          60;
Voxel size  RL (mm) =      1;
        AP (mm) =          1;
Slice thickness (mm) =      5;
Recon voxel size (mm) =          1;
Small FOV imaging =        "yes";
        OVS =              "no";
Reconstruction matrix =          64;
SENSE =              "no";
k-t BLAST =          "no";
Stacks =              1;
  type =              "parallel";
  slices =            12;
  slice gap =         "user defined";
    gap (mm) =        0;
  slice orientation = "transverse";
  fold-over direction = "AP";
  fat shift direction = "P";
Stack Offc. AP (P=+mm) = -0.332532346;
        RL (L=+mm) =  2.41664815;
        FH (H=+mm) =  9.80785444e-007;
  Ang. AP (deg) =      0;
  RL (deg) =          -4.24361372;
  FH (deg) =          0;
Minimum number of packages =    3;
Slice scan order =          "interleaved";
Large table movement =        "no";
PlanAlign =              "no";
REST slabs =              0;
Shim Size AP (mm) =       54.6583862;
        RL (mm) =         56.4545441;
        FH (mm) =         80;
  Offc. AP (P=+mm) =     -0.595884502;
        RL (L=+mm) =  2.29769874;
        FH (H=+mm) =  0.0195419118;
  Ang. AP (deg) =      0;
  RL (deg) =          -4.24361372;
  FH (deg) =          0;
Catheter tracking =        "no";
Interactive positioning =   "no";
Allow table movement =     "no";
Patient position =         "head first";
  orientation =           "supine";
Scan type =                "Imaging";
Scan mode =                "MS";
  technique =             "SE";
Modified SE =              "no";

```

```

Acquisition mode = "cartesian";
Fast Imaging mode = "EPI";
  shot mode = "single-shot";
Echoes = 1;
  partial echo = "no";
TE = "user defined";
  (ms) = 55;
Flip angle (deg) = 90;
TR = "user defined";
  (ms) = 4000;
Halfscan = "yes";
  factor = 0.600000024;
Water-fat shift = "minimum";
shared inversion prepulse = "no";
RF Shims = "adaptive";
Shim = "PB-volume";
ShimAlign = "yes";
mDIXON = "no";
Fat suppression = "SPIR";
  strength = "strong";
  frequency offset = "default";
Water suppression = "no";
Grad. rev. offres. supp. = "no";
BB pulse = "no";
MTR optimal = "no";
MTC = "no";
Research prepulse = "no";
Diffusion mode = "no";
Elastography mode = "no";
SAR mode = "high";
B1 mode = "default";
SAR Patient data = "auto";
PNS mode = "high";
Gradient mode = "enhanced";
SoftTone mode = "no";
Cardiac synchronization = "no";
Heart rate > 250 bpm = "no";
Respiratory compensation = "no";
Navigator respiratory comp = "no";
Flow compensation = "no";
Temporal slice spacing = "default";
Package recovery time = "default";
NSA = 1;
Manual start = "no";
Dynamic study = "no";
Arterial Spin labeling = "no";
Preparation phases = "auto";

```

Interactive F0 = "no";  
 SmartPlan survey = "no";  
 B0 field map = "no";  
 B1 field map = "no";  
 MIP/MPR = "no";  
 Images = " M", " R", " I", " no";  
 Autoview image = " M";  
 Calculated images = (4) " no";  
 Reference tissue = "White matter";  
 EPI 2D phase correction = "no";  
 Preset window contrast = "soft";  
 Reconstruction mode = "immediate";  
 Save raw data = "yes";  
 Hardcopy protocol = "no";  
 Ringing filtering = "rectangular";  
 Geometry correction = "default";  
 IF\_info\_seperator = 1634755923;  
 Total scan duration = "00:24.0";  
 Rel. signal level (%) = 100;  
 Act. TR (ms) = "4000";  
 Act. TE (ms) = "55";  
 ACQ matrix M x P = "64 x 47";  
 ACQ voxel MPS (mm) = "1.00 / 1.01 / 5.00";  
 REC voxel MPS (mm) = "1.00 / 1.00 / 5.00";  
 Scan percentage (%) = 98.6111145;  
 Packages = 3;  
 Min. slice gap (mm) = 0;  
 Optimal slices = 4;  
 EPI factor = 71;  
 WFS (pix) / BW (Hz) = "30.973 / 14.0";  
 BW in EPI freq. dir. (Hz) = "2100.3";  
 Min. TR (ms) = "436";  
 SAR / local torso = "< 5 %";  
 Whole body / level = "< 0.1 W/kg / normal";  
 B1 rms = "0.48 uT / 4 %";  
 PNS / level = "91 % / 1st level";  
 Sound Pressure Level (dB) = 12.1785688;

\*\*\*\*\* **Multi-TE ZOOM EPI, 4<sup>th</sup> TE** \*\*\*\*\*

Multi-transmit = "yes";  
   Active channels = "both";  
 Nucleus = "H1";  
 Coil selection = "SENSE-NV-16";  
   element selection = "HNACPC";  
   connection = "d";

```

Dual coil = "no";
CLEAR = "yes";
  body tuned = "no";
FOV   RL (mm) = 64;
      AP (mm) = 48;
      FH (mm) = 60;
Voxel size  RL (mm) = 1;
            AP (mm) = 1;
Slice thickness (mm) = 5;
Recon voxel size (mm) = 1;
Small FOV imaging = "yes";
  OVS = "no";
Reconstruction matrix = 64;
SENSE = "no";
k-t BLAST = "no";
Stacks = 1;
  type = "parallel";
  slices = 12;
  slice gap = "user defined";
    gap (mm) = 0;
  slice orientation = "transverse";
  fold-over direction = "AP";
  fat shift direction = "P";
Stack Offc. AP (P=+mm) = -0.332532346;
      RL (L=+mm) = 2.41664815;
      FH (H=+mm) = 9.80785444e-007;
  Ang. AP (deg) = 0;
      RL (deg) = -4.24361372;
      FH (deg) = 0;
Minimum number of packages = 3;
Slice scan order = "interleaved";
Large table movement = "no";
PlanAlign = "no";
REST slabs = 0;
Shim Size AP (mm) = 54.6583862;
      RL (mm) = 56.4545441;
      FH (mm) = 80;
  Offc. AP (P=+mm) = -0.595884502;
      RL (L=+mm) = 2.29769874;
      FH (H=+mm) = 0.0195419118;
  Ang. AP (deg) = 0;
      RL (deg) = -4.24361372;
      FH (deg) = 0;
Catheter tracking = "no";
Interactive positioning = "no";
Allow table movement = "no";
Patient position = "head first";

```

```

orientation = "supine";
Scan type = "Imaging";
Scan mode = "MS";
technique = "SE";
Modified SE = "no";
Acquisition mode = "cartesian";
Fast Imaging mode = "EPI";
shot mode = "single-shot";
Echoes = 1;
partial echo = "no";
TE = "user defined";
(ms) = 70;
Flip angle (deg) = 90;
TR = "user defined";
(ms) = 4000;
Halfscan = "yes";
factor = 0.600000024;
Water-fat shift = "minimum";
shared inversion prepulse = "no";
RF Shims = "adaptive";
Shim = "PB-volume";
ShimAlign = "yes";
mDIXON = "no";
Fat suppression = "SPIR";
strength = "strong";
frequency offset = "default";
Water suppression = "no";
Grad. rev. offres. supp. = "no";
BB pulse = "no";
MTR optimal = "no";
MTC = "no";
Research prepulse = "no";
Diffusion mode = "no";
Elastography mode = "no";
SAR mode = "high";
B1 mode = "default";
SAR Patient data = "auto";
PNS mode = "high";
Gradient mode = "enhanced";
SoftTone mode = "no";
Cardiac synchronization = "no";
Heart rate > 250 bpm = "no";
Respiratory compensation = "no";
Navigator respiratory comp = "no";
Flow compensation = "no";
Temporal slice spacing = "default";
Package recovery time = "default";

```



NSA = 1;  
 Manual start = "no";  
 Dynamic study = "no";  
 Arterial Spin labeling = "no";  
 Preparation phases = "auto";  
 Interactive F0 = "no";  
 SmartPlan survey = "no";  
 B0 field map = "no";  
 B1 field map = "no";  
 MIP/MPR = "no";  
 Images = " M", " R", " I", " no";  
 Autoview image = " M";  
 Calculated images = (4) " no";  
 Reference tissue = "White matter";  
 EPI 2D phase correction = "no";  
 Preset window contrast = "soft";  
 Reconstruction mode = "immediate";  
 Save raw data = "yes";  
 Hardcopy protocol = "no";  
 Ringing filtering = "rectangular";  
 Geometry correction = "default";  
 IF\_info\_seperator = 1634755923;  
 Total scan duration = "00:24.0";  
 Rel. signal level (%) = 100;  
 Act. TR (ms) = "4000";  
 Act. TE (ms) = "70";  
 ACQ matrix M x P = "64 x 47";  
 ACQ voxel MPS (mm) = "1.00 / 1.01 / 5.00";  
 REC voxel MPS (mm) = "1.00 / 1.00 / 5.00";  
 Scan percentage (%) = 98.6111145;  
 Packages = 3;  
 Min. slice gap (mm) = 0;  
 Optimal slices = 4;  
 EPI factor = 71;  
 WFS (pix) / BW (Hz) = "30.973 / 14.0";  
 BW in EPI freq. dir. (Hz) = "2100.3";  
 Min. TR (ms) = "496";  
 SAR / local torso = "< 5 %";  
 Whole body / level = "< 0.1 W/kg / normal";  
 B1 rms = "0.48 uT / 4 %";  
 PNS / level = "91 % / 1st level";  
 Sound Pressure Level (dB) = 12.1020241;

\*\*\*\*\* Multi-TE ZOOM EPI, 5<sup>th</sup> TE \*\*\*\*\*

Multi-transmit = "yes";

```

Active channels = "both";
Nucleus = "H1";
Coil selection = "SENSE-NV-16";
  element selection = "HNACPC";
  connection = "d";
Dual coil = "no";
CLEAR = "yes";
  body tuned = "no";
FOV   RL (mm) = 64;
      AP (mm) = 48;
      FH (mm) = 60;
Voxel size  RL (mm) = 1;
            AP (mm) = 1;
Slice thickness (mm) = 5;
Recon voxel size (mm) = 1;
Small FOV imaging = "yes";
  OVS = "no";
Reconstruction matrix = 64;
SENSE = "no";
k-t BLAST = "no";
Stacks = 1;
  type = "parallel";
  slices = 12;
  slice gap = "user defined";
    gap (mm) = 0;
  slice orientation = "transverse";
  fold-over direction = "AP";
  fat shift direction = "P";
Stack Offc. AP (P=+mm) = -0.332532346;
  RL (L=+mm) = 2.41664815;
  FH (H=+mm) = 9.80785444e-007;
  Ang. AP (deg) = 0;
  RL (deg) = -4.24361372;
  FH (deg) = 0;
Minimum number of packages = 3;
Slice scan order = "interleaved";
Large table movement = "no";
PlanAlign = "no";
REST slabs = 0;
Shim Size AP (mm) = 54.6583862;
  RL (mm) = 56.4545441;
  FH (mm) = 80;
  Offc. AP (P=+mm) = -0.595884502;
  RL (L=+mm) = 2.29769874;
  FH (H=+mm) = 0.0195419118;
  Ang. AP (deg) = 0;
  RL (deg) = -4.24361372;

```

```

    FH (deg) = 0;
    Catheter tracking = "no";
    Interactive positioning = "no";
    Allow table movement = "no";
    Patient position = "head first";
    orientation = "supine";
    Scan type = "Imaging";
    Scan mode = "MS";
    technique = "SE";
    Modified SE = "no";
    Acquisition mode = "cartesian";
    Fast Imaging mode = "EPI";
    shot mode = "single-shot";
    Echoes = 1;
    partial echo = "no";
    TE = "user defined";
    (ms) = 85;
    Flip angle (deg) = 90;
    TR = "user defined";
    (ms) = 4000;
    Halfscan = "yes";
    factor = 0.600000024;
    Water-fat shift = "minimum";
    shared inversion prepulse = "no";
    RF Shims = "adaptive";
    Shim = "PB-volume";
    ShimAlign = "yes";
    mDIXON = "no";
    Fat suppression = "SPIR";
    strength = "strong";
    frequency offset = "default";
    Water suppression = "no";
    Grad. rev. offres. supp. = "no";
    BB pulse = "no";
    MTR optimal = "no";
    MTC = "no";
    Research prepulse = "no";
    Diffusion mode = "no";
    Elastography mode = "no";
    SAR mode = "high";
    B1 mode = "default";
    SAR Patient data = "auto";
    PNS mode = "high";
    Gradient mode = "enhanced";
    SofTone mode = "no";
    Cardiac synchronization = "no";
    Heart rate > 250 bpm = "no";

```

Respiratory compensation = "no";  
 Navigator respiratory comp = "no";  
 Flow compensation = "no";  
 Temporal slice spacing = "default";  
 Package recovery time = "default";  
 NSA = 1;  
 Manual start = "no";  
 Dynamic study = "no";  
 Arterial Spin labeling = "no";  
 Preparation phases = "auto";  
 Interactive F0 = "no";  
 SmartPlan survey = "no";  
 B0 field map = "no";  
 B1 field map = "no";  
 MIP/MPR = "no";  
 Images = " M", " R", " I", " no";  
 Autoview image = " M";  
 Calculated images = (4) " no";  
 Reference tissue = "White matter";  
 EPI 2D phase correction = "no";  
 Preset window contrast = "soft";  
 Reconstruction mode = "immediate";  
 Save raw data = "yes";  
 Hardcopy protocol = "no";  
 Ringing filtering = "rectangular";  
 Geometry correction = "default";  
 IF\_info\_seperator = 1634755923;  
 Total scan duration = "00:24.0";  
 Rel. signal level (%) = 100;  
 Act. TR (ms) = "4000";  
 Act. TE (ms) = "85";  
 ACQ matrix M x P = "64 x 47";  
 ACQ voxel MPS (mm) = "1.00 / 1.01 / 5.00";  
 REC voxel MPS (mm) = "1.00 / 1.00 / 5.00";  
 Scan percentage (%) = 98.6111145;  
 Packages = 3;  
 Min. slice gap (mm) = 0;  
 Optimal slices = 4;  
 EPI factor = 71;  
 WFS (pix) / BW (Hz) = "30.973 / 14.0";  
 BW in EPI freq. dir. (Hz) = "2100.3";  
 Min. TR (ms) = "556";  
 SAR / local torso = "< 5 %";  
 Whole body / level = "< 0.1 W/kg / normal";  
 B1 rms = "0.48 uT / 4 %";  
 PNS / level = "91 % / 1st level";  
 Sound Pressure Level (dB) = 12.2095785;

\*\*\*\*\* Multi-TE ZOOM EPI, 6<sup>th</sup> TE \*\*\*\*\*

Multi-transmit = "yes";  
 Active channels = "both";  
 Nucleus = "H1";  
 Coil selection = "SENSE-NV-16";  
 element selection = "HNACPC";  
 connection = "d";  
 Dual coil = "no";  
 CLEAR = "yes";  
 body tuned = "no";  
 FOV RL (mm) = 64;  
 AP (mm) = 48;  
 FH (mm) = 60;  
 Voxel size RL (mm) = 1;  
 AP (mm) = 1;  
 Slice thickness (mm) = 5;  
 Recon voxel size (mm) = 1;  
 Small FOV imaging = "yes";  
 OVS = "no";  
 Reconstruction matrix = 64;  
 SENSE = "no";  
 k-t BLAST = "no";  
 Stacks = 1;  
 type = "parallel";  
 slices = 12;  
 slice gap = "user defined";  
 gap (mm) = 0;  
 slice orientation = "transverse";  
 fold-over direction = "AP";  
 fat shift direction = "P";  
 Stack Offc. AP (P=+mm) = -0.332532346;  
 RL (L=+mm) = 2.41664815;  
 FH (H=+mm) = 9.80785444e-007;  
 Ang. AP (deg) = 0;  
 RL (deg) = -4.24361372;  
 FH (deg) = 0;  
 Minimum number of packages = 3;  
 Slice scan order = "interleaved";  
 Large table movement = "no";  
 PlanAlign = "no";  
 REST slabs = 0;  
 Shim Size AP (mm) = 54.6583862;  
 RL (mm) = 56.4545441;  
 FH (mm) = 80;

Offc. AP (P=+mm) = -0.595884502;  
 RL (L=+mm) = 2.29769874;  
 FH (H=+mm) = 0.0195419118;  
 Ang. AP (deg) = 0;  
 RL (deg) = -4.24361372;  
 FH (deg) = 0;  
 Catheter tracking = "no";  
 Interactive positioning = "no";  
 Allow table movement = "no";  
 Patient position = "head first";  
 orientation = "supine";  
 Scan type = "Imaging";  
 Scan mode = "MS";  
 technique = "SE";  
 Modified SE = "no";  
 Acquisition mode = "cartesian";  
 Fast Imaging mode = "EPI";  
 shot mode = "single-shot";  
 Echoes = 1;  
 partial echo = "no";  
 TE = "user defined";  
 (ms) = 100;  
 Flip angle (deg) = 90;  
 TR = "user defined";  
 (ms) = 4000;  
 Halfscan = "yes";  
 factor = 0.600000024;  
 Water-fat shift = "minimum";  
 shared inversion prepulse = "no";  
 RF Shims = "adaptive";  
 Shim = "PB-volume";  
 ShimAlign = "yes";  
 mDIXON = "no";  
 Fat suppression = "SPIR";  
 strength = "strong";  
 frequency offset = "default";  
 Water suppression = "no";  
 Grad. rev. offres. supp. = "no";  
 BB pulse = "no";  
 MTR optimal = "no";  
 MTC = "no";  
 Research prepulse = "no";  
 Diffusion mode = "no";  
 Elastography mode = "no";  
 SAR mode = "high";  
 B1 mode = "default";  
 SAR Patient data = "auto";

```

PNS mode = "high";
Gradient mode = "enhanced";
SoftTone mode = "no";
Cardiac synchronization = "no";
Heart rate > 250 bpm = "no";
Respiratory compensation = "no";
Navigator respiratory comp = "no";
Flow compensation = "no";
Temporal slice spacing = "default";
Package recovery time = "default";
NSA = 1;
Manual start = "no";
Dynamic study = "no";
Arterial Spin labeling = "no";
Preparation phases = "auto";
Interactive F0 = "no";
SmartPlan survey = "no";
B0 field map = "no";
B1 field map = "no";
MIP/MPR = "no";
Images = " M", " R", " I", " no";
Autoview image = " M";
Calculated images = (4) " no";
Reference tissue = "White matter";
EPI 2D phase correction = "no";
Preset window contrast = "soft";
Reconstruction mode = "immediate";
Save raw data = "yes";
Hardcopy protocol = "no";
Ringing filtering = "rectangular";
Geometry correction = "default";
IF_info_seperator = 1634755923;
Total scan duration = "00:24.0";
Rel. signal level (%) = 100;
Act. TR (ms) = "4000";
Act. TE (ms) = "100";
ACQ matrix M x P = "64 x 47";
ACQ voxel MPS (mm) = "1.00 / 1.01 / 5.00";
REC voxel MPS (mm) = "1.00 / 1.00 / 5.00";
Scan percentage (%) = 98.6111145;
Packages = 3;
Min. slice gap (mm) = 0;
Optimal slices = 4;
EPI factor = 71;
WFS (pix) / BW (Hz) = "30.973 / 14.0";
BW in EPI freq. dir. (Hz) = "2100.3";
Min. TR (ms) = "616";

```

SAR / local torso = "< 5 %";  
 Whole body / level = "< 0.1 W/kg / normal";  
 B1 rms = "0.48 uT / 4 %";  
 PNS / level = "91 % / 1st level";  
 Sound Pressure Level (dB) = 12.1201229;

\*\*\*\*\* Multi-TE ZOOM EPI, 7<sup>th</sup> TE \*\*\*\*\*

Multi-transmit = "yes";  
 Active channels = "both";  
 Nucleus = "H1";  
 Coil selection = "SENSE-NV-16";  
 element selection = "HNACPC";  
 connection = "d";  
 Dual coil = "no";  
 CLEAR = "yes";  
 body tuned = "no";  
 FOV RL (mm) = 64;  
 AP (mm) = 48;  
 FH (mm) = 60;  
 Voxel size RL (mm) = 1;  
 AP (mm) = 1;  
 Slice thickness (mm) = 5;  
 Recon voxel size (mm) = 1;  
 Small FOV imaging = "yes";  
 OVS = "no";  
 Reconstruction matrix = 64;  
 SENSE = "no";  
 k-t BLAST = "no";  
 Stacks = 1;  
 type = "parallel";  
 slices = 12;  
 slice gap = "user defined";  
 gap (mm) = 0;  
 slice orientation = "transverse";  
 fold-over direction = "AP";  
 fat shift direction = "P";  
 Stack Offc. AP (P=+mm) = -0.332532346;  
 RL (L=+mm) = 2.41664815;  
 FH (H=+mm) = 9.80785444e-007;  
 Ang. AP (deg) = 0;  
 RL (deg) = -4.24361372;  
 FH (deg) = 0;  
 Minimum number of packages = 3;  
 Slice scan order = "interleaved";  
 Large table movement = "no";



```

PlanAlign = "no";
REST slabs = 0;
Shim Size AP (mm) = 54.6583862;
    RL (mm) = 56.4545441;
    FH (mm) = 80;
    Offc. AP (P=+mm) = -0.595884502;
    RL (L=+mm) = 2.29769874;
    FH (H=+mm) = 0.0195419118;
    Ang. AP (deg) = 0;
    RL (deg) = -4.24361372;
    FH (deg) = 0;
Catheter tracking = "no";
Interactive positioning = "no";
Allow table movement = "no";
Patient position = "head first";
    orientation = "supine";
Scan type = "Imaging";
Scan mode = "MS";
    technique = "SE";
Modified SE = "no";
Acquisition mode = "cartesian";
Fast Imaging mode = "EPI";
    shot mode = "single-shot";
Echoes = 1;
    partial echo = "no";
TE = "user defined";
    (ms) = 200;
Flip angle (deg) = 90;
TR = "user defined";
    (ms) = 4000;
Halfscan = "yes";
    factor = 0.600000024;
Water-fat shift = "minimum";
shared inversion prepulse = "no";
RF Shims = "adaptive";
Shim = "PB-volume";
ShimAlign = "yes";
mDIXON = "no";
Fat suppression = "SPIR";
    strength = "strong";
    frequency offset = "default";
Water suppression = "no";
Grad. rev. offres. supp. = "no";
BB pulse = "no";
MTR optimal = "no";
MTC = "no";
Research prepulse = "no";

```

Diffusion mode = "no";  
 Elastography mode = "no";  
 SAR mode = "high";  
 B1 mode = "default";  
 SAR Patient data = "auto";  
 PNS mode = "high";  
 Gradient mode = "enhanced";  
 SoftTone mode = "no";  
 Cardiac synchronization = "no";  
 Heart rate > 250 bpm = "no";  
 Respiratory compensation = "no";  
 Navigator respiratory comp = "no";  
 Flow compensation = "no";  
 Temporal slice spacing = "default";  
 Package recovery time = "default";  
 NSA = 1;  
 Manual start = "no";  
 Dynamic study = "no";  
 Arterial Spin labeling = "no";  
 Preparation phases = "auto";  
 Interactive F0 = "no";  
 SmartPlan survey = "no";  
 B0 field map = "no";  
 B1 field map = "no";  
 MIP/MPR = "no";  
 Images = " M", " R", " I", " no";  
 Autoview image = " M";  
 Calculated images = (4) " no";  
 Reference tissue = "White matter";  
 EPI 2D phase correction = "no";  
 Preset window contrast = "soft";  
 Reconstruction mode = "immediate";  
 Save raw data = "yes";  
 Hardcopy protocol = "no";  
 Ringing filtering = "rectangular";  
 Geometry correction = "default";  
 IF\_info\_seperator = 1634755923;  
 Total scan duration = "00:24.0";  
 Rel. signal level (%) = 100;  
 Act. TR (ms) = "4000";  
 Act. TE (ms) = "200";  
 ACQ matrix M x P = "64 x 47";  
 ACQ voxel MPS (mm) = "1.00 / 1.01 / 5.00";  
 REC voxel MPS (mm) = "1.00 / 1.00 / 5.00";  
 Scan percentage (%) = 98.6111145;  
 Packages = 3;  
 Min. slice gap (mm) = 0;

Optimal slices = 4;  
 EPI factor = 71;  
 WFS (pix) / BW (Hz) = "30.973 / 14.0";  
 BW in EPI freq. dir. (Hz) = "2100.3";  
 Min. TR (ms) = "1016";  
 SAR / local torso = "< 5 %";  
 Whole body / level = "< 0.1 W/kg / normal";  
 B1 rms = "0.48 uT / 4 %";  
 PNS / level = "91 % / 1st level";  
 Sound Pressure Level (dB) = 11.6565809;

\*\*\*\*\* DW ZOOM EPI, b = 1000 s /mm<sup>2</sup> \*\*\*\*\*

Multi-transmit = "yes";  
   Active channels = "both";  
 Nucleus = "H1";  
 Coil selection = "SENSE-NV-16";  
   element selection = "HNACPC";  
   connection = "d";  
 Dual coil = "no";  
 CLEAR = "yes";  
   body tuned = "no";  
 FOV    RL (mm) = 64;  
       AP (mm) = 48;  
       FH (mm) = 60;  
 Voxel size  RL (mm) = 1;  
           AP (mm) = 1;  
 Slice thickness (mm) = 5;  
 Recon voxel size (mm) = 1;  
 Small FOV imaging = "yes";  
   OVS = "no";  
 Reconstruction matrix = 64;  
 SENSE = "no";  
 k-t BLAST = "no";  
 Stacks = 1;  
   type = "parallel";  
   slices = 12;  
   slice gap = "user defined";  
     gap (mm) = 0;  
   slice orientation = "transverse";  
   fold-over direction = "AP";  
   fat shift direction = "P";  
 Stack Offc. AP (P=+mm) = -0.332532346;  
       RL (L=+mm) = 2.41664815;  
       FH (H=+mm) = 9.80785444e-007;  
   Ang. AP (deg) = 0;

RL (deg) = -4.24361372;  
 FH (deg) = 0;  
 Minimum number of packages = 3;  
 Slice scan order = "interleaved";  
 Large table movement = "no";  
 PlanAlign = "no";  
 REST slabs = 0;  
 Shim Size AP (mm) = 54.6583862;  
     RL (mm) = 56.4545441;  
     FH (mm) = 80;  
 Offc. AP (P=+mm) = -0.595884502;  
     RL (L=+mm) = 2.29769874;  
     FH (H=+mm) = 0.0195419118;  
 Ang. AP (deg) = 0;  
     RL (deg) = -4.24361372;  
     FH (deg) = 0;  
 Catheter tracking = "no";  
 Interactive positioning = "no";  
 Allow table movement = "no";  
 Patient position = "head first";  
     orientation = "supine";  
 Scan type = "Imaging";  
 Scan mode = "MS";  
     technique = "SE";  
 Modified SE = "no";  
 Acquisition mode = "cartesian";  
 Fast Imaging mode = "EPI";  
     shot mode = "single-shot";  
 Echoes = 1;  
     partial echo = "no";  
 TE = "user defined";  
     (ms) = 71;  
 Flip angle (deg) = 90;  
 TR (beats) = 4;  
 Halfscan = "yes";  
     factor = 0.600000024;  
 Water-fat shift = "minimum";  
 shared inversion prepulse = "no";  
 RF Shims = "adaptive";  
 Shim = "PB-volume";  
 ShimAlign = "yes";  
 mDIXON = "no";  
 Fat suppression = "SPIR";  
     strength = "strong";  
     frequency offset = "default";  
 Water suppression = "no";  
 Grad. rev. offres. supp. = "no";

```

BB pulse = "no";
MTR optimal = "no";
MTC = "no";
Research prepulse = "no";
Diffusion mode = "DTI";
  sequence = "SE";
  gradient duration = "maximum";
  gradient overplus = "no";
  directional resolution = "user defined";
    nr of directions = 12;
    dirs in MPS = "no";
    schemefile = "H:\schemes\dir10.txt";
  nr of b-factors = 1;
  max b-factor = 1000;
  average high b = "no";
  interleaved b0 = "yes";
  allow complex images = "no";
Elastography mode = "no";
SAR mode = "high";
B1 mode = "default";
SAR Patient data = "auto";
PNS mode = "high";
Gradient mode = "enhanced";
SoftTone mode = "no";
Cardiac synchronization = "trigger";
  device = "PPU";
Cardiac frequency = 60;
  R-R window (%) = 30, 40;
  Number of heart phases = "user defined";
    defined phases = 1;
  arrhythmia rejection = "no";
  no trig period (beats) = 1;
  trigger delay = "user defined";
    (ms) = 150;
  adaptive = "no";
  cycled MS = "no";
Heart rate > 250 bpm = "no";
Slice following = "no";
REST grid = "no";
Respiratory compensation = "no";
Navigator respiratory comp = "no";
Flow compensation = "no";
Temporal slice spacing = "default";
Package recovery time = "default";
NSA = 1;
Manual start = "no";
Dynamic study = "no";

```

```

    dyn stabilization = "yes";
    Arterial Spin labeling = "no";
    Preparation phases = "auto";
    Interactive F0 = "no";
    SmartPlan survey = "no";
    B0 field map = "no";
    B1 field map = "no";
    MIP/MPR = "no";
    Images = " M", " R", " I", " no";
    Autoview image = " M";
    Calculated images = (4) " no";
    Reference tissue = "White matter";
    EPI 2D phase correction = "no";
    Preset window contrast = "soft";
    Reconstruction mode = "immediate";
    Save raw data = "yes";
    Hardcopy protocol = "no";
    Ringing filtering = "rectangular";
    Geometry correction = "default";
    IF_info_seperator = 1634755923;
    Total scan duration = "03:00.3";
    Rel. signal level (%) = 100;
    Act. TR (ms) = "4000";
    Act. TE (ms) = "71";
    ACQ matrix M x P = "64 x 47";
    ACQ voxel MPS (mm) = "1.00 / 1.01 / 5.00";
    REC voxel MPS (mm) = "1.00 / 1.00 / 5.00";
    Scan percentage (%) = 98.6111145;
    Packages = 3;
    Min. slice gap (mm) = 0;
    Optimal slices = 4;
    Diffusion gradient timing DELTA / delta (ms) =
        "33.4 / 20.1";
    EPI factor = 71;
    Entered heartrate = 60;
    Trigger delay max. / act. (ms) = "700.0 / 150.0";
    WFS (pix) / BW (Hz) = "30.973 / 14.0";
    BW in EPI freq. dir. (Hz) = "2100.3";
    SAR / local torso = "< 7 %";
    Whole body / level = "< 0.1 W/kg / normal";
    B1 rms = "0.58 uT / 6 %";
    PNS / level = "91 % / 1st level";
    Sound Pressure Level (dB) = 10.035491;

```

\*\*\*\*\* DW ZOOM EPI, b = 2000 s /mm<sup>2</sup> \*\*\*\*\*

```

Multi-transmit = "yes";
  Active channels = "both";
Nucleus = "H1";
Coil selection = "SENSE-NV-16";
  element selection = "HNACPC";
  connection = "d";
Dual coil = "no";
CLEAR = "yes";
  body tuned = "no";
FOV    RL (mm) = 64;
      AP (mm) = 48;
      FH (mm) = 60;
Voxel size  RL (mm) = 1;
           AP (mm) = 1;
Slice thickness (mm) = 5;
Recon voxel size (mm) = 1;
Small FOV imaging = "yes";
  OVS = "no";
Reconstruction matrix = 64;
SENSE = "no";
k-t BLAST = "no";
Stacks = 1;
  type = "parallel";
  slices = 12;
  slice gap = "user defined";
    gap (mm) = 0;
  slice orientation = "transverse";
  fold-over direction = "AP";
  fat shift direction = "P";
Stack Offc. AP (P=+mm) = -0.332532346;
      RL (L=+mm) = 2.41664815;
      FH (H=+mm) = 9.80785444e-007;
  Ang. AP (deg) = 0;
      RL (deg) = -4.24361372;
      FH (deg) = 0;
Minimum number of packages = 3;
Slice scan order = "interleaved";
Large table movement = "no";
PlanAlign = "no";
REST slabs = 0;
Shim Size AP (mm) = 54.6583862;
      RL (mm) = 56.4545441;
      FH (mm) = 80;
  Offc. AP (P=+mm) = -0.595884502;
      RL (L=+mm) = 2.29769874;
      FH (H=+mm) = 0.0195419118;
  Ang. AP (deg) = 0;

```

```

    RL (deg) = -4.24361372;
    FH (deg) = 0;
Catheter tracking = "no";
Interactive positioning = "no";
Allow table movement = "no";
Patient position = "head first";
    orientation = "supine";
Scan type = "Imaging";
Scan mode = "MS";
    technique = "SE";
Modified SE = "no";
Acquisition mode = "cartesian";
Fast Imaging mode = "EPI";
    shot mode = "single-shot";
Echoes = 1;
    partial echo = "no";
TE = "user defined";
    (ms) = 71;
Flip angle (deg) = 90;
TR (beats) = 4;
Halfscan = "yes";
    factor = 0.600000024;
Water-fat shift = "minimum";
shared inversion prepulse = "no";
RF Shims = "adaptive";
Shim = "PB-volume";
ShimAlign = "yes";
mDIXON = "no";
Fat suppression = "SPIR";
    strength = "strong";
    frequency offset = "default";
Water suppression = "no";
Grad. rev. offres. supp. = "no";
BB pulse = "no";
MTR optimal = "no";
MTC = "no";
Research prepulse = "no";
Diffusion mode = "DTI";
    sequence = "SE";
    gradient duration = "maximum";
    gradient overplus = "no";
    directional resolution = "user defined";
        nr of directions = 20;
        dirs in MPS = "no";
        schemefile = "H:\schemes\dir18.txt";
    nr of b-factors = 1;
    max b-factor = 2000;

```



```

average high b = "no";
interleaved b0 = "yes";
allow complex images = "no";
Elastography mode = "no";
SAR mode = "high";
B1 mode = "default";
SAR Patient data = "auto";
PNS mode = "high";
Gradient mode = "enhanced";
SoftTone mode = "no";
Cardiac synchronization = "trigger";
    device = "PPU";
Cardiac frequency = 60;
R-R window (%) = 30, 40;
Number of heart phases = "user defined";
    defined phases = 1;
arrhythmia rejection = "no";
no trig period (beats) = 1;
trigger delay = "user defined";
    (ms) = 150;
    adaptive = "no";
    cycled MS = "no";
Heart rate > 250 bpm = "no";
Slice following = "no";
REST grid = "no";
Respiratory compensation = "no";
Navigator respiratory comp = "no";
Flow compensation = "no";
Temporal slice spacing = "default";
Package recovery time = "default";
NSA = 1;
Manual start = "no";
Dynamic study = "no";
    dyn stabilization = "yes";
Arterial Spin labeling = "no";
Preparation phases = "auto";
Interactive F0 = "no";
SmartPlan survey = "no";
B0 field map = "no";
B1 field map = "no";
MIP/MPR = "no";
Images = " M", " R", " I", " no";
Autoview image = " M";
Calculated images = (4) " no";
Reference tissue = "White matter";
EPI 2D phase correction = "no";
Preset window contrast = "soft";

```

```

Reconstruction mode =           "immediate";
Save raw data =                 "yes";
Hardcopy protocol =            "no";
Ringing filtering =             "rectangular";
Geometry correction =           "default";
IF_info_seperator =            1634755923;
Total scan duration =           "04:52.5";
Rel. signal level (%) =         100;
Act. TR (ms) =                  "4000";
Act. TE (ms) =                  "71";
ACQ matrix M x P =              "64 x 47";
ACQ voxel MPS (mm) =            "1.00 / 1.01 / 5.00";
REC voxel MPS (mm) =            "1.00 / 1.00 / 5.00";
Scan percentage (%) =           98.6111145;
Packages =                       3;
Min. slice gap (mm) =           0;
Optimal slices =                 4;
Diffusion gradient timing DELTA / delta (ms) =
                                "33.4 / 20.1";
EPI factor =                     71;
Entered heartrate =              60;
Trigger delay max. / act. (ms) = "700.0 / 150.0";
WFS (pix) / BW (Hz) =            "30.973 / 14.0";
BW in EPI freq. dir. (Hz) =      "2100.3";
SAR / local torso =              "< 7 %";
Whole body / level =             "< 0.1 W/kg / normal";
B1 rms =                          "0.58 uT / 6 %";
PNS / level =                    "91 % / 1st level";
Sound Pressure Level (dB) =       10.035491;

```

**\*\*\*\*\* DW ZOOM EPI, b = 2800 s /mm<sup>2</sup> \*\*\*\*\***

```

Multi-transmit =                 "yes";
  Active channels =                "both";
Nucleus =                         "H1";
Coil selection =                  "SENSE-NV-16";
  element selection =              "HNACPC";
  connection =                     "d";
Dual coil =                        "no";
CLEAR =                            "yes";
  body tuned =                      "no";
FOV   RL (mm) =                   64;
      AP (mm) =                     48;
      FH (mm) =                     60;
Voxel size  RL (mm) =              1;
          AP (mm) =                  1;

```

Slice thickness (mm) = 5;  
 Recon voxel size (mm) = 1;  
 Small FOV imaging = "yes";  
     OVS = "no";  
 Reconstruction matrix = 64;  
 SENSE = "no";  
 k-t BLAST = "no";  
 Stacks = 1;  
     type = "parallel";  
     slices = 12;  
     slice gap = "user defined";  
         gap (mm) = 0;  
     slice orientation = "transverse";  
     fold-over direction = "AP";  
     fat shift direction = "P";  
 Stack Offc. AP (P=+mm) = -0.332532346;  
     RL (L=+mm) = 2.41664815;  
     FH (H=+mm) = 9.80785444e-007;  
     Ang. AP (deg) = 0;  
     RL (deg) = -4.24361372;  
     FH (deg) = 0;  
 Minimum number of packages = 3;  
 Slice scan order = "interleaved";  
 Large table movement = "no";  
 PlanAlign = "no";  
 REST slabs = 0;  
 Shim Size AP (mm) = 54.6583862;  
     RL (mm) = 56.4545441;  
     FH (mm) = 80;  
     Offc. AP (P=+mm) = -0.595884502;  
         RL (L=+mm) = 2.29769874;  
         FH (H=+mm) = 0.0195419118;  
         Ang. AP (deg) = 0;  
         RL (deg) = -4.24361372;  
         FH (deg) = 0;  
 Catheter tracking = "no";  
 Interactive positioning = "no";  
 Allow table movement = "no";  
 Patient position = "head first";  
     orientation = "supine";  
 Scan type = "Imaging";  
 Scan mode = "MS";  
     technique = "SE";  
 Modified SE = "no";  
 Acquisition mode = "cartesian";  
 Fast Imaging mode = "EPI";  
     shot mode = "single-shot";

```

Echoes = 1;
  partial echo = "no";
TE = "user defined";
  (ms) = 71;
Flip angle (deg) = 90;
TR (beats) = 4;
Halfscan = "yes";
  factor = 0.600000024;
Water-fat shift = "minimum";
shared inversion prepulse = "no";
RF Shims = "adaptive";
Shim = "PB-volume";
ShimAlign = "yes";
mDIXON = "no";
Fat suppression = "SPIR";
  strength = "strong";
  frequency offset = "default";
Water suppression = "no";
Grad. rev. offres. supp. = "no";
BB pulse = "no";
MTR optimal = "no";
MTC = "no";
Research prepulse = "no";
Diffusion mode = "DTI";
  sequence = "SE";
  gradient duration = "maximum";
  gradient overplus = "no";
  directional resolution = "user defined";
  nr of directions = 30;
  dirs in MPS = "no";
  schemefile = "H:\schemes\dir28.txt";
  nr of b-factors = 1;
  max b-factor = 2800;
  average high b = "no";
  interleaved b0 = "yes";
  allow complex images = "no";
Elastography mode = "no";
SAR mode = "high";
B1 mode = "default";
SAR Patient data = "auto";
PNS mode = "high";
Gradient mode = "enhanced";
SoftTone mode = "no";
Cardiac synchronization = "trigger";
  device = "PPU";
Cardiac frequency = 60;
  R-R window (%) = 30, 40;

```

```

Number of heart phases = "user defined";
  defined phases = 1;
arrhythmia rejection = "no";
no trig period (beats) = 1;
trigger delay = "user defined";
  (ms) = 150;
  adaptive = "no";
  cycled MS = "no";
Heart rate > 250 bpm = "no";
Slice following = "no";
REST grid = "no";
Respiratory compensation = "no";
Navigator respiratory comp = "no";
Flow compensation = "no";
Temporal slice spacing = "default";
Package recovery time = "default";
NSA = 1;
Manual start = "no";
Dynamic study = "no";
  dyn stabilization = "yes";
Arterial Spin labeling = "no";
Preparation phases = "auto";
Interactive F0 = "no";
SmartPlan survey = "no";
B0 field map = "no";
B1 field map = "no";
MIP/MPR = "no";
Images = " M", " R", " I", " no";
Autoview image = " M";
Calculated images = (4) " no";
Reference tissue = "White matter";
EPI 2D phase correction = "no";
Preset window contrast = "soft";
Reconstruction mode = "immediate";
Save raw data = "yes";
Hardcopy protocol = "no";
Ringing filtering = "rectangular";
Geometry correction = "default";
IF_info_seperator = 1634755923;
Total scan duration = "07:12.8";
Rel. signal level (%) = 100;
Act. TR (ms) = "4000";
Act. TE (ms) = "71";
ACQ matrix M x P = "64 x 47";
ACQ voxel MPS (mm) = "1.00 / 1.01 / 5.00";
REC voxel MPS (mm) = "1.00 / 1.00 / 5.00";
Scan percentage (%) = 98.61111145;

```

Packages = 3;  
 Min. slice gap (mm) = 0;  
 Optimal slices = 4;  
 Diffusion gradient timing DELTA / delta (ms) =  
     "33.4 / 20.1";  
 EPI factor = 71;  
 Entered heartrate = 60;  
 Trigger delay max. / act. (ms) = "700.0 / 150.0";  
 WFS (pix) / BW (Hz) = "30.973 / 14.0";  
 BW in EPI freq. dir. (Hz) = "2100.3";  
 SAR / local torso = "< 7 %";  
 Whole body / level = "< 0.1 W/kg / normal";  
 B1 rms = "0.58 uT / 6 %";  
 PNS / level = "91 % / 1st level";  
 Sound Pressure Level (dB) = 10.035491;

\*\*\*\*\* DW ZOOM EPI, b = 300 s /mm<sup>2</sup> \*\*\*\*\*

Multi-transmit = "yes";  
   Active channels = "both";  
 Nucleus = "H1";  
 Coil selection = "SENSE-NV-16";  
   element selection = "HNACPC";  
   connection = "d";  
 Dual coil = "no";  
 CLEAR = "yes";  
   body tuned = "no";  
 FOV    RL (mm) = 64;  
       AP (mm) = 48;  
       FH (mm) = 60;  
 Voxel size  RL (mm) = 1;  
           AP (mm) = 1;  
 Slice thickness (mm) = 5;  
 Recon voxel size (mm) = 1;  
 Small FOV imaging = "yes";  
   OVS = "no";  
 Reconstruction matrix = 64;  
 SENSE = "no";  
 k-t BLAST = "no";  
 Stacks = 1;  
   type = "parallel";  
   slices = 12;  
   slice gap = "user defined";  
     gap (mm) = 0;  
   slice orientation = "transverse";  
   fold-over direction = "AP";

```

fat shift direction = "P";
Stack Offc. AP (P=+mm) = -0.332532346;
    RL (L=+mm) = 2.41664815;
    FH (H=+mm) = 9.80785444e-007;
    Ang. AP (deg) = 0;
    RL (deg) = -4.24361372;
    FH (deg) = 0;
Minimum number of packages = 3;
Slice scan order = "interleaved";
Large table movement = "no";
PlanAlign = "no";
REST slabs = 0;
Shim Size AP (mm) = 54.6583862;
    RL (mm) = 56.4545441;
    FH (mm) = 80;
    Offc. AP (P=+mm) = -0.595884502;
    RL (L=+mm) = 2.29769874;
    FH (H=+mm) = 0.0195419118;
    Ang. AP (deg) = 0;
    RL (deg) = -4.24361372;
    FH (deg) = 0;
Catheter tracking = "no";
Interactive positioning = "no";
Allow table movement = "no";
Patient position = "head first";
    orientation = "supine";
Scan type = "Imaging";
Scan mode = "MS";
    technique = "SE";
Modified SE = "no";
Acquisition mode = "cartesian";
Fast Imaging mode = "EPI";
    shot mode = "single-shot";
Echoes = 1;
    partial echo = "no";
TE = "user defined";
    (ms) = 71;
Flip angle (deg) = 90;
TR (beats) = 4;
Halfscan = "yes";
    factor = 0.600000024;
Water-fat shift = "minimum";
shared inversion prepulse = "no";
RF Shims = "adaptive";
Shim = "PB-volume";
ShimAlign = "yes";
mDIXON = "no";

```

```

Fat suppression = "SPIR";
  strength = "strong";
  frequency offset = "default";
Water suppression = "no";
Grad. rev. offres. supp. = "no";
BB pulse = "no";
MTR optimal = "no";
MTC = "no";
Research prepulse = "no";
Diffusion mode = "DTI";
  sequence = "SE";
  gradient duration = "maximum";
  gradient overplus = "no";
  directional resolution = "user defined";
    nr of directions = 6;
    dirs in MPS = "no";
    schemefile = "H:\schemes\dir4.txt";
  nr of b-factors = 1;
  max b-factor = 300;
  average high b = "no";
  interleaved b0 = "yes";
  allow complex images = "no";
Elastography mode = "no";
SAR mode = "high";
B1 mode = "default";
SAR Patient data = "auto";
PNS mode = "high";
Gradient mode = "enhanced";
SoftTone mode = "no";
Cardiac synchronization = "trigger";
  device = "PPU";
Cardiac frequency = 60;
  R-R window (%) = 30, 40;
  Number of heart phases = "user defined";
    defined phases = 1;
  arrhythmia rejection = "no";
  no trig period (beats) = 1;
  trigger delay = "user defined";
    (ms) = 150;
  adaptive = "no";
  cycled MS = "no";
Heart rate > 250 bpm = "no";
Slice following = "no";
REST grid = "no";
Respiratory compensation = "no";
Navigator respiratory comp = "no";
Flow compensation = "no";

```



Temporal slice spacing = "default";  
 Package recovery time = "default";  
 NSA = 1;  
 Manual start = "no";  
 Dynamic study = "no";  
   dyn stabilization = "yes";  
 Arterial Spin labeling = "no";  
 Preparation phases = "auto";  
 Interactive FO = "no";  
 SmartPlan survey = "no";  
 B0 field map = "no";  
 B1 field map = "no";  
 MIP/MPR = "no";  
 Images = " M", " R", " I", " no";  
 Autoview image = " M";  
 Calculated images = (4) " no";  
 Reference tissue = "White matter";  
 EPI 2D phase correction = "no";  
 Preset window contrast = "soft";  
 Reconstruction mode = "immediate";  
 Save raw data = "yes";  
 Hardcopy protocol = "no";  
 Ringing filtering = "rectangular";  
 Geometry correction = "default";  
 IF\_info\_seperator = 1634755923;  
 Total scan duration = "01:36.2";  
 Rel. signal level (%) = 100;  
 Act. TR (ms) = "4000";  
 Act. TE (ms) = "71";  
 ACQ matrix M x P = "64 x 47";  
 ACQ voxel MPS (mm) = "1.00 / 1.01 / 5.00";  
 REC voxel MPS (mm) = "1.00 / 1.00 / 5.00";  
 Scan percentage (%) = 98.6111145;  
 Packages = 3;  
 Min. slice gap (mm) = 0;  
 Optimal slices = 4;  
 Diffusion gradient timing DELTA / delta (ms) = "33.4 / 20.1";  
 EPI factor = 71;  
 Entered heartrate = 60;  
 Trigger delay max. / act. (ms) = "700.0 / 150.0";  
 WFS (pix) / BW (Hz) = "30.973 / 14.0";  
 BW in EPI freq. dir. (Hz) = "2100.3";  
 SAR / local torso = "< 7 %";  
 Whole body / level = "< 0.1 W/kg / normal";  
 B1 rms = "0.58 uT / 6 %";  
 PNS / level = "91 % / 1st level";  
 Sound Pressure Level (dB) = 10.035491;

\*\*\*\*\* Quantitative Magnetisation Transfer ZOOM EPI \*\*\*\*\*

Multi-transmit = "yes";  
 Active channels = "both";  
 Nucleus = "H1";  
 Coil selection = "SENSE-NV-16";  
 element selection = "HNACPC";  
 connection = "d";  
 Dual coil = "no";  
 CLEAR = "yes";  
 body tuned = "no";  
 FOV RL (mm) = 64;  
 AP (mm) = 48;  
 FH (mm) = 60;  
 Voxel size RL (mm) = 1;  
 AP (mm) = 1;  
 Slice thickness (mm) = 5;  
 Recon voxel size (mm) = 1;  
 Small FOV imaging = "yes";  
 OVS = "no";  
 Reconstruction matrix = 64;  
 SENSE = "no";  
 k-t BLAST = "no";  
 Stacks = 1;  
 type = "parallel";  
 slices = 12;  
 slice gap = "user defined";  
 gap (mm) = 0;  
 slice orientation = "transverse";  
 fold-over direction = "AP";  
 fat shift direction = "P";  
 Stack Offc. AP (P=+mm) = -0.332532346;  
 RL (L=+mm) = 2.41664815;  
 FH (H=+mm) = 9.80785444e-007;  
 Ang. AP (deg) = 0;  
 RL (deg) = -4.24361372;  
 FH (deg) = 0;  
 Minimum number of packages = 3;  
 Slice scan order = "interleaved";  
 Large table movement = "no";  
 PlanAlign = "no";  
 REST slabs = 0;  
 Shim Size AP (mm) = 54.6583862;  
 RL (mm) = 56.4545441;  
 FH (mm) = 80;  
 Offc. AP (P=+mm) = -0.595884502;

RL (L=+mm) = 2.29769874;  
 FH (H=+mm) = 0.0195419118;  
 Ang. AP (deg) = 0;  
 RL (deg) = -4.24361372;  
 FH (deg) = 0;  
 Catheter tracking = "no";  
 Interactive positioning = "no";  
 Allow table movement = "no";  
 Patient position = "head first";  
 orientation = "supine";  
 Scan type = "Imaging";  
 Scan mode = "MS";  
 technique = "SE";  
 Modified SE = "no";  
 Acquisition mode = "cartesian";  
 Fast Imaging mode = "EPI";  
 shot mode = "single-shot";  
 Echoes = 1;  
 partial echo = "no";  
 TE = "shortest";  
 Flip angle (deg) = 90;  
 TR = "shortest";  
 Halfscan = "yes";  
 factor = 0.600000024;  
 Water-fat shift = "minimum";  
 shared inversion prepulse = "no";  
 RF Shims = "adaptive";  
 Shim = "PB-volume";  
 ShimAlign = "yes";  
 mDIXON = "no";  
 Fat suppression = "SPIR";  
 strength = "strong";  
 frequency offset = "default";  
 Water suppression = "no";  
 Grad. rev. offres. supp. = "yes";  
 BB pulse = "no";  
 MTR optimal = "no";  
 MTC = "no";  
 Research prepulse = "yes";  
 pulse shape = "sg\_100\_100\_0";  
 Shared per package = "yes";  
 Slice shuffling = "dynamic loop";  
 elements = 25;  
 all same = "yes";  
 repeated pulse angle = 1471;  
 repeated pulse dur = 15;  
 repeated pulse phase = 0;

```

repeated pulse interval = 15;
delay time = 0;
freq offset = 0;
select grad in (uT/m) = 0;
Diffusion mode = "no";
Elastography mode = "no";
SAR mode = "high";
B1 mode = "default";
SAR Patient data = "auto";
PNS mode = "high";
Gradient mode = "enhanced";
SofTone mode = "no";
Cardiac synchronization = "no";
Heart rate > 250 bpm = "no";
Respiratory compensation = "no";
Navigator respiratory comp = "no";
Flow compensation = "yes";
Temporal slice spacing = "minimal";
Package recovery time = "user defined";
    Recovery time = 6260;
NSA = 1;
Manual start = "no";
Dynamic study = "individual";
    dyn scans = 44;
    recon multiplier = 1;
    dyn scan times = "shortest";
    FOV time mode = "default";
    dummy scans = 0;
    immediate subtraction = "no";
    fast next scan = "no";
    synch. ext. device = "no";
    Noise scan = "no";
    Research Prepulse = "yes";
    REPP Freq Series = "no";
    Manual frequency offsets = "yes";
    Frequency Offsets = (4) 96000,
                        (4) 8393, (4) 13597, (4) 1070,
                        (4) 14125, (4) 1007, (4) 1013,
                        (4) 2698, (4) 3763, (4) 1053,
                        (4) 3779, (20) 0;
    Manual flip angles = "yes";
    Flip angles = (4) 300, (4) 1465,
                 (4) 1440, (4) 426, (4) 1429,
                 (4) 433, (4) 1460, (4) 524,
                 (4) 1462, (4) 1459, (4) 1438,
                 (20) 0;
    Manual train length = "no";

```

dyn stabilization = "no";  
 prospect. motion corr. = "no";  
 Keyhole = "no";  
 Arterial Spin labeling = "no";  
 Preparation phases = "auto";  
 Interactive F0 = "no";  
 SmartPlan survey = "no";  
 B0 field map = "no";  
 B1 field map = "no";  
 MIP/MPR = "no";  
 Images = " M", " R", " I", " no";  
 Autoview image = " M";  
 Calculated images = (4) " no";  
 Reference tissue = "Grey matter";  
 EPI 2D phase correction = "no";  
 Preset window contrast = "soft";  
 Reconstruction mode = "real time";  
 reuse memory = "no";  
 Save raw data = "yes";  
 Hardcopy protocol = "no";  
 Ringing filtering = "rectangular";  
 Geometry correction = "default";  
 IF\_info\_seperator = 1634755923;  
 Total scan duration = "16:18.3";  
 Rel. signal level (%) = 100;  
 Act. TR (ms) = "7246";  
 Act. TE (ms) = "24";  
 Dyn. scan time = "00:21.7";  
 ACQ matrix M x P = "64 x 47";  
 ACQ voxel MPS (mm) = "1.00 / 1.01 / 5.00";  
 REC voxel MPS (mm) = "1.00 / 1.00 / 5.00";  
 Scan percentage (%) = 98.6111145;  
 Packages = 3;  
 Min. slice gap (mm) = 0;  
 EPI factor = 71;  
 WFS (pix) / BW (Hz) = "30.973 / 14.0";  
 BW in EPI freq. dir. (Hz) = "2100.3";  
 Full flow comp. = "no";  
 SAR / local torso = "< 64 %";  
 Whole body / level = "< 1.0 W/kg / normal";  
 B1 rms = "1.75 uT / 56 %";  
 PNS / level = "91 % / 1st level";  
 Sound Pressure Level (dB) = 15.4398813;

# Vendor 2 (3T Siemens Prisma)

\*\*\*\*\* DWI b = 2800 s/mm<sup>2</sup> \*\*\*\*\*

## Properties

|                                               |                    |
|-----------------------------------------------|--------------------|
| Prio recon                                    | Off                |
| Load images to viewer                         | On                 |
| Inline movie                                  | Off                |
| Auto store images                             | On                 |
| Load images to stamp segments                 | Off                |
| Load images to graphic segments               | Off                |
| Auto open inline display                      | Off                |
| Auto close inline display                     | Off                |
| Start measurement without further preparation | Off                |
| Wait for user to start                        | Off                |
| Start measurements                            | Single measurement |

## Routine

|                    |                               |
|--------------------|-------------------------------|
| Slice group        | 1                             |
| Slices             | 12                            |
| Dist. factor       | 0 %                           |
| Position           | L2.2 P5.2 H52.0 mm            |
| Orientation        | T > C5.2                      |
| Phase enc. dir.    | A >> P                        |
| AutoAlign          | ---                           |
| Phase oversampling | 0 %                           |
| FoV read           | 64 mm                         |
| FoV phase          | 78.1 %                        |
| Slice thickness    | 5.0 mm                        |
| TR                 | 150 ms                        |
| TE                 | 85.0 ms                       |
| Averages           | 1                             |
| Concatenations     | 12                            |
| Filter             | Raw filter, Prescan Normalize |
| Coil elements      | HC7;NC1,2                     |

## Contrast - Common

|                   |          |
|-------------------|----------|
| TR                | 150 ms   |
| TE                | 85.0 ms  |
| MTC               | Off      |
| Magn. preparation | None     |
| Fat suppr.        | Fat sat. |
| Fat sat. mode     | Strong   |

## Contrast - Dynamic

|                 |           |
|-----------------|-----------|
| Averages        | 1         |
| Averaging mode  | Long term |
| Reconstruction  | Magnitude |
| Measurements    | 1         |
| Delay in TR     | 0 ms      |
| Multiple series | Off       |

## Resolution - Common

|                       |        |
|-----------------------|--------|
| FoV read              | 64 mm  |
| FoV phase             | 78.1 % |
| Slice thickness       | 5.0 mm |
| Base resolution       | 64     |
| Phase resolution      | 100 %  |
| Phase partial Fourier | 6/8    |
| Interpolation         | Off    |

## Resolution - iPAT

|             |      |
|-------------|------|
| Accel. mode | None |
|-------------|------|

## Resolution - Filter Image

|                     |     |
|---------------------|-----|
| Distortion Corr.    | Off |
| Prescan Normalize   | On  |
| Dynamic Field Corr. | Off |

## Resolution - Filter Rawdata

|                   |     |
|-------------------|-----|
| Raw filter        | On  |
| Elliptical filter | Off |

## Geometry - Common

|                  |                    |
|------------------|--------------------|
| Slice group      | 1                  |
| Slices           | 12                 |
| Dist. factor     | 0 %                |
| Position         | L2.2 P5.2 H52.0 mm |
| Orientation      | T > C5.2           |
| Phase enc. dir.  | A >> P             |
| FoV read         | 64 mm              |
| FoV phase        | 78.1 %             |
| Slice thickness  | 5.0 mm             |
| TR               | 150 ms             |
| Multi-slice mode | Interleaved        |
| Series           | Interleaved        |
| Concatenations   | 12                 |

## Geometry - AutoAlign

|                     |                    |
|---------------------|--------------------|
| Slice group         | 1                  |
| Position            | L2.2 P5.2 H52.0 mm |
| Orientation         | T > C5.2           |
| Phase enc. dir.     | A >> P             |
| AutoAlign           | ---                |
| Initial Position    | L2.2 P5.2 H38.0    |
| Phase               | 8.6 mm             |
| Read                | -2.2 mm            |
| Shift               | 37.4 mm            |
| Initial Rotation    | 0.00 deg           |
| Initial Orientation | T > C              |
| T > C               | 5.2                |
| > S                 | 0.0                |

## Geometry - Saturation

|               |          |
|---------------|----------|
| Fat suppr.    | Fat sat. |
| Fat sat. mode | Strong   |
| Special sat.  | None     |

## Geometry - Navigator

## Geometry - Tim Planning Suite

|                   |       |
|-------------------|-------|
| Set-n-Go Protocol | Off   |
| Table position    | H     |
| Table position    | 14 mm |
| Inline Composing  | Off   |

## System - Miscellaneous

|                   |                  |
|-------------------|------------------|
| Positioning mode  | REF              |
| Table position    | H                |
| Table position    | 14 mm            |
| MSMA              | S - C - T        |
| Sagittal          | L >> R           |
| Coronal           | A >> P           |
| Transversal       | H >> F           |
| Coil Combine Mode | Adaptive Combine |

**System - Miscellaneous**

|                     |                      |
|---------------------|----------------------|
| Matrix Optimization | Off                  |
| AutoAlign           | ---                  |
| Coil Select Mode    | Off - AutoCoilSelect |

**System - Adjustments**

|                          |          |
|--------------------------|----------|
| B0 Shim mode             | Standard |
| B1 Shim mode             | TrueForm |
| Adjust with body coil    | Off      |
| Confirm freq. adjustment | Off      |
| Assume Dominant Fat      | Off      |
| Assume Silicone          | Off      |
| Adjustment Tolerance     | Auto     |

**System - Adjust Volume**

|             |                    |
|-------------|--------------------|
| Position    | L2.2 P5.2 H52.0 mm |
| Orientation | T > C5.2           |
| Rotation    | 0.00 deg           |
| A >> P      | 50 mm              |
| R >> L      | 64 mm              |
| F >> H      | 60 mm              |
| Reset       | Off                |
| Couple to   | Acquisition volume |

**System - pTx Volumes**

|                 |                    |
|-----------------|--------------------|
| B1 Shim mode    | TrueForm           |
| Excitation      | ZOOMit             |
| pTx Volume      | 1                  |
| Vol. Property   | Optimization Vol.  |
| Position        | L2.2 P5.2 H52.0 mm |
| Orientation     | T > C5.2           |
| Rotation        | 0 deg              |
| A >> P          | 250 mm             |
| R >> L          | 64 mm              |
| F >> H          | 60 mm              |
| Vol. Visibility | On                 |

**System - Tx/Rx**

|                     |                |
|---------------------|----------------|
| Frequency 1H        | 123.256882 MHz |
| Correction factor   | 1              |
| Gain                | High           |
| Img. Scale Cor.     | 1.000          |
| Reset               | Off            |
| ? Ref. amplitude 1H | 0.000 V        |

**Physio - Signal1**

|                    |               |
|--------------------|---------------|
| 1st Signal/Mode    | Pulse/Trigger |
| Average cycle      | 973 ± 45 ms   |
| Average cycle      | 996 ± 45 ms   |
| Acquisition window | 650 ms        |
| Trigger pulse      | 1             |
| Trigger delay      | 200 ms        |
| TR                 | 150 ms        |
| Concatenations     | 12            |
| Phases             | 1             |

**Physio - PACE**

|                |     |
|----------------|-----|
| Resp. control  | Off |
| Concatenations | 12  |

**Diff - Neuro**

|                  |           |
|------------------|-----------|
| Diffusion mode   | MDDW      |
| Diff. directions | 30        |
| Diffusion Scheme | Monopolar |

**Diff - Neuro**

|                       |                        |
|-----------------------|------------------------|
| Diff. weightings      | 2                      |
| b-value 1             | 0 s/mm <sup>2</sup>    |
| b-value 2             | 2800 s/mm <sup>2</sup> |
| b-value 1             | 1                      |
| b-value 2             | 1                      |
| Diff. weighted images | On                     |
| Trace weighted images | On                     |
| ADC maps              | Off                    |
| FA maps               | Off                    |
| Mosaic                | On                     |
| Tensor                | Off                    |
| Noise level           | 0                      |

**Diff - Body**

|                       |                        |
|-----------------------|------------------------|
| Diffusion mode        | MDDW                   |
| Diff. directions      | 30                     |
| Diffusion Scheme      | Monopolar              |
| Diff. weightings      | 2                      |
| b-value 1             | 0 s/mm <sup>2</sup>    |
| b-value 2             | 2800 s/mm <sup>2</sup> |
| b-value 1             | 1                      |
| b-value 2             | 1                      |
| Diff. weighted images | On                     |
| Trace weighted images | On                     |
| ADC maps              | Off                    |
| Exponential ADC Maps  | Off                    |
| FA maps               | Off                    |
| Invert Gray Scale     | Off                    |
| Calculated Image      | Off                    |
| b-Value >=            | 0 s/mm <sup>2</sup>    |
| Noise level           | 0                      |

**Diff - Composing**

|                  |     |
|------------------|-----|
| Inline Composing | Off |
| Distortion Corr. | Off |

**Sequence - Part 1**

|                   |             |
|-------------------|-------------|
| Introduction      | On          |
| Optimization      | None        |
| Multi-slice mode  | Interleaved |
| Free echo spacing | Off         |
| Echo spacing      | 0.93 ms     |
| Bandwidth         | 1240 Hz/Px  |

**Sequence - Part 2**

|               |             |
|---------------|-------------|
| EPI factor    | 50          |
| RF pulse type | Normal      |
| Gradient mode | Performance |
| Excitation    | ZOOMit      |

**Sequence - pTX Pulses**

|                 |     |
|-----------------|-----|
| pTX Pulse       | 1   |
| TX acceleration | 1.0 |

\*\*\*\*\* DWI b = 2000 s/mm<sup>2</sup> \*\*\*\*\*

### Properties

|                                               |                    |
|-----------------------------------------------|--------------------|
| Prio recon                                    | Off                |
| Load images to viewer                         | On                 |
| Inline movie                                  | Off                |
| Auto store images                             | On                 |
| Load images to stamp segments                 | Off                |
| Load images to graphic segments               | Off                |
| Auto open inline display                      | Off                |
| Auto close inline display                     | Off                |
| Start measurement without further preparation | Off                |
| Wait for user to start                        | Off                |
| Start measurements                            | Single measurement |

### Routine

|                    |                               |
|--------------------|-------------------------------|
| Slice group        | 1                             |
| Slices             | 12                            |
| Dist. factor       | 0 %                           |
| Position           | L2.2 P5.2 H52.0 mm            |
| Orientation        | T > C5.2                      |
| Phase enc. dir.    | A >> P                        |
| AutoAlign          | ---                           |
| Phase oversampling | 0 %                           |
| FoV read           | 64 mm                         |
| FoV phase          | 78.1 %                        |
| Slice thickness    | 5.0 mm                        |
| TR                 | 150 ms                        |
| TE                 | 85.0 ms                       |
| Averages           | 1                             |
| Concatenations     | 12                            |
| Filter             | Raw filter, Prescan Normalize |
| Coil elements      | HC7;NC1,2                     |

### Contrast - Common

|                   |          |
|-------------------|----------|
| TR                | 150 ms   |
| TE                | 85.0 ms  |
| MTC               | Off      |
| Magn. preparation | None     |
| Fat suppr.        | Fat sat. |
| Fat sat. mode     | Strong   |

### Contrast - Dynamic

|                 |           |
|-----------------|-----------|
| Averages        | 1         |
| Averaging mode  | Long term |
| Reconstruction  | Magnitude |
| Measurements    | 1         |
| Delay in TR     | 0 ms      |
| Multiple series | Off       |

### Resolution - Common

|                       |        |
|-----------------------|--------|
| FoV read              | 64 mm  |
| FoV phase             | 78.1 % |
| Slice thickness       | 5.0 mm |
| Base resolution       | 64     |
| Phase resolution      | 100 %  |
| Phase partial Fourier | 6/8    |
| Interpolation         | Off    |

### Resolution - iPAT

|             |      |
|-------------|------|
| Accel. mode | None |
|-------------|------|

### Resolution - Filter Image

|                     |     |
|---------------------|-----|
| Distortion Corr.    | Off |
| Prescan Normalize   | On  |
| Dynamic Field Corr. | Off |

### Resolution - Filter Rawdata

|                   |     |
|-------------------|-----|
| Raw filter        | On  |
| Elliptical filter | Off |

### Geometry - Common

|                  |                    |
|------------------|--------------------|
| Slice group      | 1                  |
| Slices           | 12                 |
| Dist. factor     | 0 %                |
| Position         | L2.2 P5.2 H52.0 mm |
| Orientation      | T > C5.2           |
| Phase enc. dir.  | A >> P             |
| FoV read         | 64 mm              |
| FoV phase        | 78.1 %             |
| Slice thickness  | 5.0 mm             |
| TR               | 150 ms             |
| Multi-slice mode | Interleaved        |
| Series           | Interleaved        |
| Concatenations   | 12                 |

### Geometry - AutoAlign

|                     |                    |
|---------------------|--------------------|
| Slice group         | 1                  |
| Position            | L2.2 P5.2 H52.0 mm |
| Orientation         | T > C5.2           |
| Phase enc. dir.     | A >> P             |
| AutoAlign           | ---                |
| Initial Position    | L2.2 P5.2 H38.0    |
| Phase               | 8.6 mm             |
| Read                | -2.2 mm            |
| Shift               | 37.4 mm            |
| Initial Rotation    | 0.00 deg           |
| Initial Orientation | T > C              |
| T > C               | 5.2                |
| > S                 | 0.0                |

### Geometry - Saturation

|               |          |
|---------------|----------|
| Fat suppr.    | Fat sat. |
| Fat sat. mode | Strong   |
| Special sat.  | None     |

### Geometry - Navigator

### Geometry - Tim Planning Suite

|                   |       |
|-------------------|-------|
| Set-n-Go Protocol | Off   |
| Table position    | H     |
| Table position    | 14 mm |
| Inline Composing  | Off   |

### System - Miscellaneous

|                   |                  |
|-------------------|------------------|
| Positioning mode  | REF              |
| Table position    | H                |
| Table position    | 14 mm            |
| MSMA              | S - C - T        |
| Sagittal          | L >> R           |
| Coronal           | A >> P           |
| Transversal       | H >> F           |
| Coil Combine Mode | Adaptive Combine |



**System - Miscellaneous**

|                     |                      |
|---------------------|----------------------|
| Matrix Optimization | Off                  |
| AutoAlign           | ---                  |
| Coil Select Mode    | Off - AutoCoilSelect |

**System - Adjustments**

|                          |          |
|--------------------------|----------|
| B0 Shim mode             | Standard |
| B1 Shim mode             | TrueForm |
| Adjust with body coil    | Off      |
| Confirm freq. adjustment | Off      |
| Assume Dominant Fat      | Off      |
| Assume Silicone          | Off      |
| Adjustment Tolerance     | Auto     |

**System - Adjust Volume**

|             |                    |
|-------------|--------------------|
| Position    | L2.2 P5.2 H52.0 mm |
| Orientation | T > C5.2           |
| Rotation    | 0.00 deg           |
| A >> P      | 50 mm              |
| R >> L      | 64 mm              |
| F >> H      | 60 mm              |
| Reset       | Off                |
| Couple to   | Acquisition volume |

**System - pTx Volumes**

|                 |                    |
|-----------------|--------------------|
| B1 Shim mode    | TrueForm           |
| Excitation      | ZOOMit             |
| pTx Volume      | 1                  |
| Vol. Property   | Optimization Vol.  |
| Position        | L2.2 P5.2 H52.0 mm |
| Orientation     | T > C5.2           |
| Rotation        | 0 deg              |
| A >> P          | 250 mm             |
| R >> L          | 64 mm              |
| F >> H          | 60 mm              |
| Vol. Visibility | On                 |

**System - Tx/Rx**

|                     |                |
|---------------------|----------------|
| Frequency 1H        | 123.256882 MHz |
| Correction factor   | 1              |
| Gain                | High           |
| Img. Scale Cor.     | 1.000          |
| Reset               | Off            |
| ? Ref. amplitude 1H | 0.000 V        |

**Physio - Signal1**

|                    |               |
|--------------------|---------------|
| 1st Signal/Mode    | Pulse/Trigger |
| Average cycle      | 975 ± 43 ms   |
| Average cycle      | 993 ± 43 ms   |
| Acquisition window | 650 ms        |
| Trigger pulse      | 1             |
| Trigger delay      | 200 ms        |
| TR                 | 150 ms        |
| Concatenations     | 12            |
| Phases             | 1             |

**Physio - PACE**

|                |     |
|----------------|-----|
| Resp. control  | Off |
| Concatenations | 12  |

**Diff - Neuro**

|                  |           |
|------------------|-----------|
| Diffusion mode   | MDDW      |
| Diff. directions | 20        |
| Diffusion Scheme | Monopolar |

**Diff - Neuro**

|                       |                        |
|-----------------------|------------------------|
| Diff. weightings      | 2                      |
| b-value 1             | 0 s/mm <sup>2</sup>    |
| b-value 2             | 2000 s/mm <sup>2</sup> |
| b-value 1             | 1                      |
| b-value 2             | 1                      |
| Diff. weighted images | On                     |
| Trace weighted images | On                     |
| ADC maps              | Off                    |
| FA maps               | Off                    |
| Mosaic                | On                     |
| Tensor                | Off                    |
| Noise level           | 0                      |

**Diff - Body**

|                       |                        |
|-----------------------|------------------------|
| Diffusion mode        | MDDW                   |
| Diff. directions      | 20                     |
| Diffusion Scheme      | Monopolar              |
| Diff. weightings      | 2                      |
| b-value 1             | 0 s/mm <sup>2</sup>    |
| b-value 2             | 2000 s/mm <sup>2</sup> |
| b-value 1             | 1                      |
| b-value 2             | 1                      |
| Diff. weighted images | On                     |
| Trace weighted images | On                     |
| ADC maps              | Off                    |
| Exponential ADC Maps  | Off                    |
| FA maps               | Off                    |
| Invert Gray Scale     | Off                    |
| Calculated Image      | Off                    |
| b-Value >=            | 0 s/mm <sup>2</sup>    |
| Noise level           | 0                      |

**Diff - Composing**

|                  |     |
|------------------|-----|
| Inline Composing | Off |
| Distortion Corr. | Off |

**Sequence - Part 1**

|                   |             |
|-------------------|-------------|
| Introduction      | On          |
| Optimization      | None        |
| Multi-slice mode  | Interleaved |
| Free echo spacing | Off         |
| Echo spacing      | 0.93 ms     |
| Bandwidth         | 1240 Hz/Px  |

**Sequence - Part 2**

|               |             |
|---------------|-------------|
| EPI factor    | 50          |
| RF pulse type | Normal      |
| Gradient mode | Performance |
| Excitation    | ZOOMit      |

**Sequence - pTX Pulses**

|                 |     |
|-----------------|-----|
| pTX Pulse       | 1   |
| TX acceleration | 1.0 |

\*\*\*\*\* DWI b = 1000 s/mm<sup>2</sup> \*\*\*\*\*

### Properties

|                                               |                    |
|-----------------------------------------------|--------------------|
| Prio recon                                    | Off                |
| Load images to viewer                         | On                 |
| Inline movie                                  | Off                |
| Auto store images                             | On                 |
| Load images to stamp segments                 | Off                |
| Load images to graphic segments               | Off                |
| Auto open inline display                      | Off                |
| Auto close inline display                     | Off                |
| Start measurement without further preparation | Off                |
| Wait for user to start                        | Off                |
| Start measurements                            | Single measurement |

### Routine

|                    |                               |
|--------------------|-------------------------------|
| Slice group        | 1                             |
| Slices             | 12                            |
| Dist. factor       | 0 %                           |
| Position           | L2.2 P5.2 H52.0 mm            |
| Orientation        | T > C5.2                      |
| Phase enc. dir.    | A >> P                        |
| AutoAlign          | ---                           |
| Phase oversampling | 0 %                           |
| FoV read           | 64 mm                         |
| FoV phase          | 78.1 %                        |
| Slice thickness    | 5.0 mm                        |
| TR                 | 150 ms                        |
| TE                 | 85.0 ms                       |
| Averages           | 1                             |
| Concatenations     | 12                            |
| Filter             | Raw filter, Prescan Normalize |
| Coil elements      | HC7;NC1,2                     |

### Contrast - Common

|                   |          |
|-------------------|----------|
| TR                | 150 ms   |
| TE                | 85.0 ms  |
| MTC               | Off      |
| Magn. preparation | None     |
| Fat suppr.        | Fat sat. |
| Fat sat. mode     | Strong   |

### Contrast - Dynamic

|                 |           |
|-----------------|-----------|
| Averages        | 1         |
| Averaging mode  | Long term |
| Reconstruction  | Magnitude |
| Measurements    | 1         |
| Delay in TR     | 0 ms      |
| Multiple series | Off       |

### Resolution - Common

|                       |        |
|-----------------------|--------|
| FoV read              | 64 mm  |
| FoV phase             | 78.1 % |
| Slice thickness       | 5.0 mm |
| Base resolution       | 64     |
| Phase resolution      | 100 %  |
| Phase partial Fourier | 6/8    |
| Interpolation         | Off    |

### Resolution - iPAT

|             |      |
|-------------|------|
| Accel. mode | None |
|-------------|------|

### Resolution - Filter Image

|                     |     |
|---------------------|-----|
| Distortion Corr.    | Off |
| Prescan Normalize   | On  |
| Dynamic Field Corr. | Off |

### Resolution - Filter Rawdata

|                   |     |
|-------------------|-----|
| Raw filter        | On  |
| Elliptical filter | Off |

### Geometry - Common

|                  |                    |
|------------------|--------------------|
| Slice group      | 1                  |
| Slices           | 12                 |
| Dist. factor     | 0 %                |
| Position         | L2.2 P5.2 H52.0 mm |
| Orientation      | T > C5.2           |
| Phase enc. dir.  | A >> P             |
| FoV read         | 64 mm              |
| FoV phase        | 78.1 %             |
| Slice thickness  | 5.0 mm             |
| TR               | 150 ms             |
| Multi-slice mode | Interleaved        |
| Series           | Interleaved        |
| Concatenations   | 12                 |

### Geometry - AutoAlign

|                     |                    |
|---------------------|--------------------|
| Slice group         | 1                  |
| Position            | L2.2 P5.2 H52.0 mm |
| Orientation         | T > C5.2           |
| Phase enc. dir.     | A >> P             |
| AutoAlign           | ---                |
| Initial Position    | L2.2 P5.2 H38.0    |
| Phase               | 8.6 mm             |
| Read                | -2.2 mm            |
| Shift               | 37.4 mm            |
| Initial Rotation    | 0.00 deg           |
| Initial Orientation | T > C              |
| T > C               | 5.2                |
| > S                 | 0.0                |

### Geometry - Saturation

|               |          |
|---------------|----------|
| Fat suppr.    | Fat sat. |
| Fat sat. mode | Strong   |
| Special sat.  | None     |

### Geometry - Navigator

### Geometry - Tim Planning Suite

|                   |       |
|-------------------|-------|
| Set-n-Go Protocol | Off   |
| Table position    | H     |
| Table position    | 14 mm |
| Inline Composing  | Off   |

### System - Miscellaneous

|                   |                  |
|-------------------|------------------|
| Positioning mode  | REF              |
| Table position    | H                |
| Table position    | 14 mm            |
| MSMA              | S - C - T        |
| Sagittal          | L >> R           |
| Coronal           | A >> P           |
| Transversal       | H >> F           |
| Coil Combine Mode | Adaptive Combine |

### System - Miscellaneous

|                     |                      |
|---------------------|----------------------|
| Matrix Optimization | Off                  |
| AutoAlign           | ---                  |
| Coil Select Mode    | Off - AutoCoilSelect |

### System - Adjustments

|                          |          |
|--------------------------|----------|
| B0 Shim mode             | Standard |
| B1 Shim mode             | TrueForm |
| Adjust with body coil    | Off      |
| Confirm freq. adjustment | Off      |
| Assume Dominant Fat      | Off      |
| Assume Silicone          | Off      |
| Adjustment Tolerance     | Auto     |

### System - Adjust Volume

|             |                    |
|-------------|--------------------|
| Position    | L2.2 P5.2 H52.0 mm |
| Orientation | T > C5.2           |
| Rotation    | 0.00 deg           |
| A >> P      | 50 mm              |
| R >> L      | 64 mm              |
| F >> H      | 60 mm              |
| Reset       | Off                |
| Couple to   | Acquisition volume |

### System - pTx Volumes

|                 |                    |
|-----------------|--------------------|
| B1 Shim mode    | TrueForm           |
| Excitation      | ZOOMit             |
| pTx Volume      | 1                  |
| Vol. Property   | Optimization Vol.  |
| Position        | L2.2 P5.2 H52.0 mm |
| Orientation     | T > C5.2           |
| Rotation        | 0 deg              |
| A >> P          | 250 mm             |
| R >> L          | 64 mm              |
| F >> H          | 60 mm              |
| Vol. Visibility | On                 |

### System - Tx/Rx

|                     |                |
|---------------------|----------------|
| Frequency 1H        | 123.256882 MHz |
| Correction factor   | 1              |
| Gain                | High           |
| Img. Scale Cor.     | 1.000          |
| Reset               | Off            |
| ? Ref. amplitude 1H | 0.000 V        |

### Physio - Signal1

|                    |               |
|--------------------|---------------|
| 1st Signal/Mode    | Pulse/Trigger |
| Average cycle      | 974 ± 41 ms   |
| Average cycle      | 971 ± 41 ms   |
| Acquisition window | 650 ms        |
| Trigger pulse      | 1             |
| Trigger delay      | 200 ms        |
| TR                 | 150 ms        |
| Concatenations     | 12            |
| Phases             | 1             |

### Physio - PACE

|                |     |
|----------------|-----|
| Resp. control  | Off |
| Concatenations | 12  |

### Diff - Neuro

|                  |           |
|------------------|-----------|
| Diffusion mode   | MDDW      |
| Diff. directions | 12        |
| Diffusion Scheme | Monopolar |

### Diff - Neuro

|                       |                        |
|-----------------------|------------------------|
| Diff. weightings      | 2                      |
| b-value 1             | 0 s/mm <sup>2</sup>    |
| b-value 2             | 1000 s/mm <sup>2</sup> |
| b-value 1             | 1                      |
| b-value 2             | 1                      |
| Diff. weighted images | On                     |
| Trace weighted images | On                     |
| ADC maps              | Off                    |
| FA maps               | Off                    |
| Mosaic                | On                     |
| Tensor                | Off                    |
| Noise level           | 0                      |

### Diff - Body

|                       |                        |
|-----------------------|------------------------|
| Diffusion mode        | MDDW                   |
| Diff. directions      | 12                     |
| Diffusion Scheme      | Monopolar              |
| Diff. weightings      | 2                      |
| b-value 1             | 0 s/mm <sup>2</sup>    |
| b-value 2             | 1000 s/mm <sup>2</sup> |
| b-value 1             | 1                      |
| b-value 2             | 1                      |
| Diff. weighted images | On                     |
| Trace weighted images | On                     |
| ADC maps              | Off                    |
| Exponential ADC Maps  | Off                    |
| FA maps               | Off                    |
| Invert Gray Scale     | Off                    |
| Calculated Image      | Off                    |
| b-Value >=            | 0 s/mm <sup>2</sup>    |
| Noise level           | 0                      |

### Diff - Composing

|                  |     |
|------------------|-----|
| Inline Composing | Off |
| Distortion Corr. | Off |

### Sequence - Part 1

|                   |             |
|-------------------|-------------|
| Introduction      | On          |
| Optimization      | None        |
| Multi-slice mode  | Interleaved |
| Free echo spacing | Off         |
| Echo spacing      | 0.93 ms     |
| Bandwidth         | 1240 Hz/Px  |

### Sequence - Part 2

|               |             |
|---------------|-------------|
| EPI factor    | 50          |
| RF pulse type | Normal      |
| Gradient mode | Performance |
| Excitation    | ZOOMit      |

### Sequence - pTX Pulses

|                 |     |
|-----------------|-----|
| pTX Pulse       | 1   |
| TX acceleration | 1.0 |

\*\*\*\*\* DWI b = 300 s/mm<sup>2</sup> \*\*\*\*\*

### Properties

|                                               |                    |
|-----------------------------------------------|--------------------|
| Prio recon                                    | Off                |
| Load images to viewer                         | On                 |
| Inline movie                                  | Off                |
| Auto store images                             | On                 |
| Load images to stamp segments                 | Off                |
| Load images to graphic segments               | Off                |
| Auto open inline display                      | Off                |
| Auto close inline display                     | Off                |
| Start measurement without further preparation | Off                |
| Wait for user to start                        | Off                |
| Start measurements                            | Single measurement |

### Routine

|                    |                               |
|--------------------|-------------------------------|
| Slice group        | 1                             |
| Slices             | 12                            |
| Dist. factor       | 0 %                           |
| Position           | L2.2 P5.2 H52.0 mm            |
| Orientation        | T > C5.2                      |
| Phase enc. dir.    | A >> P                        |
| AutoAlign          | ---                           |
| Phase oversampling | 0 %                           |
| FoV read           | 64 mm                         |
| FoV phase          | 78.1 %                        |
| Slice thickness    | 5.0 mm                        |
| TR                 | 150 ms                        |
| TE                 | 85.0 ms                       |
| Averages           | 1                             |
| Concatenations     | 12                            |
| Filter             | Raw filter, Prescan Normalize |
| Coil elements      | HC7;NC1,2                     |

### Contrast - Common

|                   |          |
|-------------------|----------|
| TR                | 150 ms   |
| TE                | 85.0 ms  |
| MTC               | Off      |
| Magn. preparation | None     |
| Fat suppr.        | Fat sat. |
| Fat sat. mode     | Strong   |

### Contrast - Dynamic

|                 |           |
|-----------------|-----------|
| Averages        | 1         |
| Averaging mode  | Long term |
| Reconstruction  | Magnitude |
| Measurements    | 1         |
| Delay in TR     | 0 ms      |
| Multiple series | Off       |

### Resolution - Common

|                       |        |
|-----------------------|--------|
| FoV read              | 64 mm  |
| FoV phase             | 78.1 % |
| Slice thickness       | 5.0 mm |
| Base resolution       | 64     |
| Phase resolution      | 100 %  |
| Phase partial Fourier | 6/8    |
| Interpolation         | Off    |

### Resolution - iPAT

|             |      |
|-------------|------|
| Accel. mode | None |
|-------------|------|

### Resolution - Filter Image

|                     |     |
|---------------------|-----|
| Distortion Corr.    | Off |
| Prescan Normalize   | On  |
| Dynamic Field Corr. | Off |

### Resolution - Filter Rawdata

|                   |     |
|-------------------|-----|
| Raw filter        | On  |
| Elliptical filter | Off |

### Geometry - Common

|                  |                    |
|------------------|--------------------|
| Slice group      | 1                  |
| Slices           | 12                 |
| Dist. factor     | 0 %                |
| Position         | L2.2 P5.2 H52.0 mm |
| Orientation      | T > C5.2           |
| Phase enc. dir.  | A >> P             |
| FoV read         | 64 mm              |
| FoV phase        | 78.1 %             |
| Slice thickness  | 5.0 mm             |
| TR               | 150 ms             |
| Multi-slice mode | Interleaved        |
| Series           | Interleaved        |
| Concatenations   | 12                 |

### Geometry - AutoAlign

|                     |                    |
|---------------------|--------------------|
| Slice group         | 1                  |
| Position            | L2.2 P5.2 H52.0 mm |
| Orientation         | T > C5.2           |
| Phase enc. dir.     | A >> P             |
| AutoAlign           | ---                |
| Initial Position    | L2.2 P5.2 H38.0    |
| Phase               | 8.6 mm             |
| Read                | -2.2 mm            |
| Shift               | 37.4 mm            |
| Initial Rotation    | 0.00 deg           |
| Initial Orientation | T > C              |
| T > C               | 5.2                |
| > S                 | 0.0                |

### Geometry - Saturation

|               |          |
|---------------|----------|
| Fat suppr.    | Fat sat. |
| Fat sat. mode | Strong   |
| Special sat.  | None     |

### Geometry - Navigator

### Geometry - Tim Planning Suite

|                   |       |
|-------------------|-------|
| Set-n-Go Protocol | Off   |
| Table position    | H     |
| Table position    | 14 mm |
| Inline Composing  | Off   |

### System - Miscellaneous

|                   |                  |
|-------------------|------------------|
| Positioning mode  | REF              |
| Table position    | H                |
| Table position    | 14 mm            |
| MSMA              | S - C - T        |
| Sagittal          | L >> R           |
| Coronal           | A >> P           |
| Transversal       | H >> F           |
| Coil Combine Mode | Adaptive Combine |

### System - Miscellaneous

|                     |                      |
|---------------------|----------------------|
| Matrix Optimization | Off                  |
| AutoAlign           | ---                  |
| Coil Select Mode    | Off - AutoCoilSelect |

### System - Adjustments

|                          |          |
|--------------------------|----------|
| B0 Shim mode             | Standard |
| B1 Shim mode             | TrueForm |
| Adjust with body coil    | Off      |
| Confirm freq. adjustment | Off      |
| Assume Dominant Fat      | Off      |
| Assume Silicone          | Off      |
| Adjustment Tolerance     | Auto     |

### System - Adjust Volume

|             |                    |
|-------------|--------------------|
| Position    | L2.2 P5.2 H52.0 mm |
| Orientation | T > C5.2           |
| Rotation    | 0.00 deg           |
| A >> P      | 50 mm              |
| R >> L      | 64 mm              |
| F >> H      | 60 mm              |
| Reset       | Off                |
| Couple to   | Acquisition volume |

### System - pTx Volumes

|                 |                    |
|-----------------|--------------------|
| B1 Shim mode    | TrueForm           |
| Excitation      | ZOOMit             |
| pTx Volume      | 1                  |
| Vol. Property   | Optimization Vol.  |
| Position        | L2.2 P5.2 H52.0 mm |
| Orientation     | T > C5.2           |
| Rotation        | 0 deg              |
| A >> P          | 250 mm             |
| R >> L          | 64 mm              |
| F >> H          | 60 mm              |
| Vol. Visibility | On                 |

### System - Tx/Rx

|                     |                |
|---------------------|----------------|
| Frequency 1H        | 123.256882 MHz |
| Correction factor   | 1              |
| Gain                | High           |
| Img. Scale Cor.     | 1.000          |
| Reset               | Off            |
| ? Ref. amplitude 1H | 0.000 V        |

### Physio - Signal1

|                    |               |
|--------------------|---------------|
| 1st Signal/Mode    | Pulse/Trigger |
| Average cycle      | 973 ± 40 ms   |
| Average cycle      | 971 ± 40 ms   |
| Acquisition window | 650 ms        |
| Trigger pulse      | 1             |
| Trigger delay      | 200 ms        |
| TR                 | 150 ms        |
| Concatenations     | 12            |
| Phases             | 1             |

### Physio - PACE

|                |     |
|----------------|-----|
| Resp. control  | Off |
| Concatenations | 12  |

### Diff - Neuro

|                  |           |
|------------------|-----------|
| Diffusion mode   | MDDW      |
| Diff. directions | 6         |
| Diffusion Scheme | Monopolar |

### Diff - Neuro

|                       |                       |
|-----------------------|-----------------------|
| Diff. weightings      | 2                     |
| b-value 1             | 0 s/mm <sup>2</sup>   |
| b-value 2             | 300 s/mm <sup>2</sup> |
| b-value 1             | 1                     |
| b-value 2             | 1                     |
| Diff. weighted images | On                    |
| Trace weighted images | On                    |
| ADC maps              | Off                   |
| FA maps               | Off                   |
| Mosaic                | On                    |
| Tensor                | Off                   |
| Noise level           | 0                     |

### Diff - Body

|                       |                       |
|-----------------------|-----------------------|
| Diffusion mode        | MDDW                  |
| Diff. directions      | 6                     |
| Diffusion Scheme      | Monopolar             |
| Diff. weightings      | 2                     |
| b-value 1             | 0 s/mm <sup>2</sup>   |
| b-value 2             | 300 s/mm <sup>2</sup> |
| b-value 1             | 1                     |
| b-value 2             | 1                     |
| Diff. weighted images | On                    |
| Trace weighted images | On                    |
| ADC maps              | Off                   |
| Exponential ADC Maps  | Off                   |
| FA maps               | Off                   |
| Invert Gray Scale     | Off                   |
| Calculated Image      | Off                   |
| b-Value >=            | 0 s/mm <sup>2</sup>   |
| Noise level           | 0                     |

### Diff - Composing

|                  |     |
|------------------|-----|
| Inline Composing | Off |
| Distortion Corr. | Off |

### Sequence - Part 1

|                   |             |
|-------------------|-------------|
| Introduction      | On          |
| Optimization      | None        |
| Multi-slice mode  | Interleaved |
| Free echo spacing | Off         |
| Echo spacing      | 0.93 ms     |
| Bandwidth         | 1240 Hz/Px  |

### Sequence - Part 2

|               |             |
|---------------|-------------|
| EPI factor    | 50          |
| RF pulse type | Normal      |
| Gradient mode | Performance |
| Excitation    | ZOOMit      |

### Sequence - pTX Pulses

|                 |     |
|-----------------|-----|
| pTX Pulse       | 1   |
| TX acceleration | 1.0 |

**\*\*\*\*\* Anatomical T2\*-weighted (MEDIC) \*\*\*\*\***

**Properties**

|                                               |                    |
|-----------------------------------------------|--------------------|
| Prio recon                                    | Off                |
| Load images to viewer                         | On                 |
| Inline movie                                  | Off                |
| Auto store images                             | On                 |
| Load images to stamp segments                 | Off                |
| Load images to graphic segments               | Off                |
| Auto open inline display                      | Off                |
| Auto close inline display                     | Off                |
| Start measurement without further preparation | Off                |
| Wait for user to start                        | Off                |
| Start measurements                            | Single measurement |

**Routine**

|                    |                                                       |
|--------------------|-------------------------------------------------------|
| Slice group        | 1                                                     |
| Slices             | 12                                                    |
| Dist. factor       | 0 %                                                   |
| Position           | L2.2 P5.2 H52.0 mm                                    |
| Orientation        | T > C5.2                                              |
| Phase enc. dir.    | A >> P                                                |
| AutoAlign          | ---                                                   |
| Phase oversampling | 50 %                                                  |
| FoV read           | 128 mm                                                |
| FoV phase          | 100.0 %                                               |
| Slice thickness    | 5.0 mm                                                |
| TR                 | 625.0 ms                                              |
| TE                 | 15.0 ms                                               |
| Averages           | 3                                                     |
| Concatenations     | 1                                                     |
| Filter             | Distortion Corr.(2D),<br>Normalize, Elliptical filter |
| Coil elements      | HC7:NC1,2                                             |

**Contrast - Common**

|              |          |
|--------------|----------|
| TR           | 625.0 ms |
| TE           | 15.0 ms  |
| MTC          | Off      |
| Flip angle   | 30 deg   |
| Fat suppr.   | None     |
| Water suppr. | None     |

**Contrast - Dynamic**

|                 |           |
|-----------------|-----------|
| Averages        | 3         |
| Averaging mode  | Long term |
| Reconstruction  | Magnitude |
| Measurements    | 1         |
| Multiple series | Off       |

**Resolution - Common**

|                       |         |
|-----------------------|---------|
| FoV read              | 128 mm  |
| FoV phase             | 100.0 % |
| Slice thickness       | 5.0 mm  |
| Base resolution       | 256     |
| Phase resolution      | 100 %   |
| Phase partial Fourier | Off     |
| Interpolation         | Off     |

**Resolution - iPAT**

|                  |        |
|------------------|--------|
| PAT mode         | GRAPPA |
| Accel. factor PE | 2      |

**Resolution - iPAT**

|                     |            |
|---------------------|------------|
| Ref. lines PE       | 24         |
| Reference scan mode | Integrated |

**Resolution - Filter Image**

|                   |     |
|-------------------|-----|
| Image Filter      | Off |
| Distortion Corr.  | On  |
| Mode              | 2D  |
| Unfiltered images | Off |
| Prescan Normalize | Off |
| Normalize         | On  |
| B1 filter         | Off |

**Resolution - Filter Rawdata**

|                   |     |
|-------------------|-----|
| Raw filter        | Off |
| Elliptical filter | On  |

**Geometry - Common**

|                  |                    |
|------------------|--------------------|
| Slice group      | 1                  |
| Slices           | 12                 |
| Dist. factor     | 0 %                |
| Position         | L2.2 P5.2 H52.0 mm |
| Orientation      | T > C5.2           |
| Phase enc. dir.  | A >> P             |
| FoV read         | 128 mm             |
| FoV phase        | 100.0 %            |
| Slice thickness  | 5.0 mm             |
| TR               | 625.0 ms           |
| Multi-slice mode | Interleaved        |
| Series           | Interleaved        |
| Concatenations   | 1                  |

**Geometry - AutoAlign**

|                     |                    |
|---------------------|--------------------|
| Slice group         | 1                  |
| Position            | L2.2 P5.2 H52.0 mm |
| Orientation         | T > C5.2           |
| Phase enc. dir.     | A >> P             |
| AutoAlign           | ---                |
| Initial Position    | L2.2 P5.2 H38.0    |
| Phase               | 8.6 mm             |
| Read                | -2.2 mm            |
| Shift               | 37.4 mm            |
| Initial Rotation    | 0.00 deg           |
| Initial Orientation | T > C              |
| T > C               | 5.2                |
| > S                 | 0.0                |

**Geometry - Saturation**

|              |                    |
|--------------|--------------------|
| Sat. region  | 1                  |
| Thickness    | 59 mm              |
| Position     | R0.5 A46.1 F6.6 mm |
| Orientation  | C > T-8.2 > S-0.6  |
| Water suppr. | None               |
| Special sat. | None               |

**Geometry - Tim Planning Suite**

|                   |       |
|-------------------|-------|
| Set-n-Go Protocol | Off   |
| Table position    | H     |
| Table position    | 14 mm |
| Inline Composing  | Off   |

**System - Miscellaneous**

|                     |                  |
|---------------------|------------------|
| Positioning mode    | REF              |
| Table position      | H                |
| Table position      | 14 mm            |
| MSMA                | S - C - T        |
| Sagittal            | L >> R           |
| Coronal             | A >> P           |
| Transversal         | H >> F           |
| Coil Combine Mode   | Adaptive Combine |
| Save uncombined     | Off              |
| Matrix Optimization | Off              |
| AutoAlign           | ---              |
| Coil Select Mode    | Default          |

**System - Adjustments**

|                          |          |
|--------------------------|----------|
| B0 Shim mode             | Standard |
| B1 Shim mode             | TrueForm |
| Adjust with body coil    | Off      |
| Confirm freq. adjustment | Off      |
| Assume Dominant Fat      | Off      |
| Assume Silicone          | Off      |
| Adjustment Tolerance     | Auto     |

**System - Adjust Volume**

|             |                    |
|-------------|--------------------|
| Position    | L2.2 P5.2 H52.0 mm |
| Orientation | T > C5.2           |
| Rotation    | 0.00 deg           |
| A >> P      | 128 mm             |
| R >> L      | 128 mm             |
| F >> H      | 60 mm              |
| Reset       | Off                |

**System - pTx Volumes**

|              |          |
|--------------|----------|
| B1 Shim mode | TrueForm |
|--------------|----------|

**System - Tx/Rx**

|                     |                |
|---------------------|----------------|
| Frequency 1H        | 123.256882 MHz |
| Correction factor   | 1              |
| Gain                | High           |
| Img. Scale Cor.     | 1.000          |
| Reset               | Off            |
| ? Ref. amplitude 1H | 0.000 V        |

**Physio - Signal1**

|                 |          |
|-----------------|----------|
| 1st Signal/Mode | None     |
| TR              | 625.0 ms |
| Concatenations  | 1        |

**Inline - Common**

|                      |     |
|----------------------|-----|
| Subtract             | Off |
| Measurements         | 1   |
| StdDev               | Off |
| Save original images | On  |

**Inline - MIP**

|                      |     |
|----------------------|-----|
| MIP-Sag              | Off |
| MIP-Cor              | Off |
| MIP-Tra              | Off |
| MIP-Time             | Off |
| Save original images | On  |

**Inline - Composing**

|                  |     |
|------------------|-----|
| Inline Composing | Off |
| Distortion Corr. | On  |

**Inline - Composing**

|                   |     |
|-------------------|-----|
| Mode              | 2D  |
| Unfiltered images | Off |

**Sequence - Part 1**

|                  |             |
|------------------|-------------|
| Introduction     | On          |
| Dimension        | 2D          |
| Combined echoes  | 3           |
| Flow comp.       | Yes         |
| Multi-slice mode | Interleaved |
| Bandwidth        | 260 Hz/Px   |

**Sequence - Part 2**

|               |        |
|---------------|--------|
| RF pulse type | Normal |
| Gradient mode | Fast   |
| RF spoiling   | On     |

**Sequence - Assistant**

|      |     |
|------|-----|
| Mode | Off |
|------|-----|

\*\*\*\*\* Multi-TE, TE = 200 ms \*\*\*\*\*

**Properties**

|                                               |                    |
|-----------------------------------------------|--------------------|
| Prio recon                                    | Off                |
| Load images to viewer                         | On                 |
| Inline movie                                  | Off                |
| Auto store images                             | On                 |
| Load images to stamp segments                 | Off                |
| Load images to graphic segments               | Off                |
| Auto open inline display                      | Off                |
| Auto close inline display                     | Off                |
| Start measurement without further preparation | Off                |
| Wait for user to start                        | Off                |
| Start measurements                            | Single measurement |

**Routine**

|                    |                               |
|--------------------|-------------------------------|
| Slice group        | 1                             |
| Slices             | 12                            |
| Dist. factor       | 0 %                           |
| Position           | L2.2 P5.2 H52.0 mm            |
| Orientation        | T > C5.2                      |
| Phase enc. dir.    | A >> P                        |
| AutoAlign          | ---                           |
| Phase oversampling | 0 %                           |
| FoV read           | 64 mm                         |
| FoV phase          | 78.1 %                        |
| Slice thickness    | 5.0 mm                        |
| TR                 | 270 ms                        |
| TE                 | 200.0 ms                      |
| Averages           | 1                             |
| Concatenations     | 12                            |
| Filter             | Raw filter, Prescan Normalize |
| Coil elements      | HC7;NC1,2                     |

**Contrast - Common**

|                   |          |
|-------------------|----------|
| TR                | 270 ms   |
| TE                | 200.0 ms |
| MTC               | Off      |
| Magn. preparation | None     |
| Fat suppr.        | Fat sat. |
| Fat sat. mode     | Strong   |

**Contrast - Dynamic**

|                 |           |
|-----------------|-----------|
| Averages        | 1         |
| Averaging mode  | Long term |
| Reconstruction  | Magnitude |
| Measurements    | 1         |
| Delay in TR     | 0 ms      |
| Multiple series | Off       |

**Resolution - Common**

|                       |        |
|-----------------------|--------|
| FoV read              | 64 mm  |
| FoV phase             | 78.1 % |
| Slice thickness       | 5.0 mm |
| Base resolution       | 64     |
| Phase resolution      | 100 %  |
| Phase partial Fourier | 6/8    |
| Interpolation         | Off    |

**Resolution - iPAT**

|             |      |
|-------------|------|
| Accel. mode | None |
|-------------|------|

**Resolution - Filter Image**

|                     |     |
|---------------------|-----|
| Distortion Corr.    | Off |
| Prescan Normalize   | On  |
| Dynamic Field Corr. | Off |

**Resolution - Filter Rawdata**

|                   |     |
|-------------------|-----|
| Raw filter        | On  |
| Elliptical filter | Off |

**Geometry - Common**

|                  |                    |
|------------------|--------------------|
| Slice group      | 1                  |
| Slices           | 12                 |
| Dist. factor     | 0 %                |
| Position         | L2.2 P5.2 H52.0 mm |
| Orientation      | T > C5.2           |
| Phase enc. dir.  | A >> P             |
| FoV read         | 64 mm              |
| FoV phase        | 78.1 %             |
| Slice thickness  | 5.0 mm             |
| TR               | 270 ms             |
| Multi-slice mode | Interleaved        |
| Series           | Interleaved        |
| Concatenations   | 12                 |

**Geometry - AutoAlign**

|                     |                    |
|---------------------|--------------------|
| Slice group         | 1                  |
| Position            | L2.2 P5.2 H52.0 mm |
| Orientation         | T > C5.2           |
| Phase enc. dir.     | A >> P             |
| AutoAlign           | ---                |
| Initial Position    | L2.2 P5.2 H38.0    |
| Phase               | 8.6 mm             |
| Read                | -2.2 mm            |
| Shift               | 37.4 mm            |
| Initial Rotation    | 0.00 deg           |
| Initial Orientation | T > C              |
| T > C               | 5.2                |
| > S                 | 0.0                |

**Geometry - Saturation**

|               |          |
|---------------|----------|
| Fat suppr.    | Fat sat. |
| Fat sat. mode | Strong   |
| Special sat.  | None     |

**Geometry - Navigator**

**Geometry - Tim Planning Suite**

|                   |       |
|-------------------|-------|
| Set-n-Go Protocol | Off   |
| Table position    | H     |
| Table position    | 14 mm |
| Inline Composing  | Off   |

**System - Miscellaneous**

|                   |                  |
|-------------------|------------------|
| Positioning mode  | REF              |
| Table position    | H                |
| Table position    | 14 mm            |
| MSMA              | S - C - T        |
| Sagittal          | L >> R           |
| Coronal           | A >> P           |
| Transversal       | H >> F           |
| Coil Combine Mode | Adaptive Combine |



### System - Miscellaneous

|                     |                      |
|---------------------|----------------------|
| Matrix Optimization | Off                  |
| AutoAlign           | ---                  |
| Coil Select Mode    | Off - AutoCoilSelect |

### System - Adjustments

|                          |          |
|--------------------------|----------|
| B0 Shim mode             | Standard |
| B1 Shim mode             | TrueForm |
| Adjust with body coil    | Off      |
| Confirm freq. adjustment | Off      |
| Assume Dominant Fat      | Off      |
| Assume Silicone          | Off      |
| Adjustment Tolerance     | Auto     |

### System - Adjust Volume

|             |                    |
|-------------|--------------------|
| Position    | L2.2 P5.2 H52.0 mm |
| Orientation | T > C5.2           |
| Rotation    | 0.00 deg           |
| A >> P      | 50 mm              |
| R >> L      | 64 mm              |
| F >> H      | 60 mm              |
| Reset       | Off                |
| Couple to   | Acquisition volume |

### System - pTx Volumes

|                 |                    |
|-----------------|--------------------|
| B1 Shim mode    | TrueForm           |
| Excitation      | ZOOMit             |
| pTx Volume      | 1                  |
| Vol. Property   | Optimization Vol.  |
| Position        | L2.2 P5.2 H52.0 mm |
| Orientation     | T > C5.2           |
| Rotation        | 0 deg              |
| A >> P          | 250 mm             |
| R >> L          | 64 mm              |
| F >> H          | 60 mm              |
| Vol. Visibility | On                 |

### System - Tx/Rx

|                     |                |
|---------------------|----------------|
| Frequency 1H        | 123.256882 MHz |
| Correction factor   | 1              |
| Gain                | High           |
| Img. Scale Cor.     | 1.000          |
| Reset               | Off            |
| ? Ref. amplitude 1H | 0.000 V        |

### Physio - Signal1

|                    |               |
|--------------------|---------------|
| 1st Signal/Mode    | Pulse/Trigger |
| Average cycle      | 970 ± 37 ms   |
| Average cycle      | 960 ± 37 ms   |
| Acquisition window | 650 ms        |
| Trigger pulse      | 1             |
| Trigger delay      | 200 ms        |
| TR                 | 270 ms        |
| Concatenations     | 12            |
| Phases             | 1             |

### Physio - PACE

|                |     |
|----------------|-----|
| Resp. control  | Off |
| Concatenations | 12  |

### Diff - Neuro

|                  |           |
|------------------|-----------|
| Diffusion mode   | MDDW      |
| Diff. directions | 30        |
| Diffusion Scheme | Monopolar |

### Diff - Neuro

|                       |                     |
|-----------------------|---------------------|
| Diff. weightings      | 1                   |
| b-value               | 0 s/mm <sup>2</sup> |
| b-value               | 1                   |
| Diff. weighted images | On                  |
| Trace weighted images | Off                 |
| ADC maps              | Off                 |
| FA maps               | Off                 |
| Mosaic                | Off                 |
| Tensor                | Off                 |
| Noise level           | 0                   |

### Diff - Body

|                       |                     |
|-----------------------|---------------------|
| Diffusion mode        | MDDW                |
| Diff. directions      | 30                  |
| Diffusion Scheme      | Monopolar           |
| Diff. weightings      | 1                   |
| b-value               | 0 s/mm <sup>2</sup> |
| b-value               | 1                   |
| Diff. weighted images | On                  |
| Trace weighted images | Off                 |
| ADC maps              | Off                 |
| Exponential ADC Maps  | Off                 |
| FA maps               | Off                 |
| Invert Gray Scale     | Off                 |
| Calculated Image      | Off                 |
| b-Value >=            | 0 s/mm <sup>2</sup> |
| Noise level           | 0                   |

### Diff - Composing

|                  |     |
|------------------|-----|
| Inline Composing | Off |
| Distortion Corr. | Off |

### Sequence - Part 1

|                   |             |
|-------------------|-------------|
| Introduction      | On          |
| Optimization      | None        |
| Multi-slice mode  | Interleaved |
| Free echo spacing | Off         |
| Echo spacing      | 0.93 ms     |
| Bandwidth         | 1240 Hz/Px  |

### Sequence - Part 2

|               |             |
|---------------|-------------|
| EPI factor    | 50          |
| RF pulse type | Normal      |
| Gradient mode | Performance |
| Excitation    | ZOOMit      |

### Sequence - pTX Pulses

|                 |     |
|-----------------|-----|
| pTX Pulse       | 1   |
| TX acceleration | 1.0 |

\*\*\*\*\* Multi-TE, TE = 120 ms \*\*\*\*\*

**Properties**

|                                               |                    |
|-----------------------------------------------|--------------------|
| Prio recon                                    | Off                |
| Load images to viewer                         | On                 |
| Inline movie                                  | Off                |
| Auto store images                             | On                 |
| Load images to stamp segments                 | Off                |
| Load images to graphic segments               | Off                |
| Auto open inline display                      | Off                |
| Auto close inline display                     | Off                |
| Start measurement without further preparation | Off                |
| Wait for user to start                        | Off                |
| Start measurements                            | Single measurement |

**Routine**

|                    |                               |
|--------------------|-------------------------------|
| Slice group        | 1                             |
| Slices             | 12                            |
| Dist. factor       | 0 %                           |
| Position           | L2.2 P5.2 H52.0 mm            |
| Orientation        | T > C5.2                      |
| Phase enc. dir.    | A >> P                        |
| AutoAlign          | ---                           |
| Phase oversampling | 0 %                           |
| FoV read           | 64 mm                         |
| FoV phase          | 78.1 %                        |
| Slice thickness    | 5.0 mm                        |
| TR                 | 270 ms                        |
| TE                 | 120.0 ms                      |
| Averages           | 1                             |
| Concatenations     | 12                            |
| Filter             | Raw filter, Prescan Normalize |
| Coil elements      | HC7;NC1,2                     |

**Contrast - Common**

|                   |          |
|-------------------|----------|
| TR                | 270 ms   |
| TE                | 120.0 ms |
| MTC               | Off      |
| Magn. preparation | None     |
| Fat suppr.        | Fat sat. |
| Fat sat. mode     | Strong   |

**Contrast - Dynamic**

|                 |           |
|-----------------|-----------|
| Averages        | 1         |
| Averaging mode  | Long term |
| Reconstruction  | Magnitude |
| Measurements    | 1         |
| Delay in TR     | 0 ms      |
| Multiple series | Off       |

**Resolution - Common**

|                       |        |
|-----------------------|--------|
| FoV read              | 64 mm  |
| FoV phase             | 78.1 % |
| Slice thickness       | 5.0 mm |
| Base resolution       | 64     |
| Phase resolution      | 100 %  |
| Phase partial Fourier | 6/8    |
| Interpolation         | Off    |

**Resolution - iPAT**

|             |      |
|-------------|------|
| Accel. mode | None |
|-------------|------|

**Resolution - Filter Image**

|                     |     |
|---------------------|-----|
| Distortion Corr.    | Off |
| Prescan Normalize   | On  |
| Dynamic Field Corr. | Off |

**Resolution - Filter Rawdata**

|                   |     |
|-------------------|-----|
| Raw filter        | On  |
| Elliptical filter | Off |

**Geometry - Common**

|                  |                    |
|------------------|--------------------|
| Slice group      | 1                  |
| Slices           | 12                 |
| Dist. factor     | 0 %                |
| Position         | L2.2 P5.2 H52.0 mm |
| Orientation      | T > C5.2           |
| Phase enc. dir.  | A >> P             |
| FoV read         | 64 mm              |
| FoV phase        | 78.1 %             |
| Slice thickness  | 5.0 mm             |
| TR               | 270 ms             |
| Multi-slice mode | Interleaved        |
| Series           | Interleaved        |
| Concatenations   | 12                 |

**Geometry - AutoAlign**

|                     |                    |
|---------------------|--------------------|
| Slice group         | 1                  |
| Position            | L2.2 P5.2 H52.0 mm |
| Orientation         | T > C5.2           |
| Phase enc. dir.     | A >> P             |
| AutoAlign           | ---                |
| Initial Position    | L2.2 P5.2 H38.0    |
| Phase               | 8.6 mm             |
| Read                | -2.2 mm            |
| Shift               | 37.4 mm            |
| Initial Rotation    | 0.00 deg           |
| Initial Orientation | T > C              |
| T > C               | 5.2                |
| > S                 | 0.0                |

**Geometry - Saturation**

|               |          |
|---------------|----------|
| Fat suppr.    | Fat sat. |
| Fat sat. mode | Strong   |
| Special sat.  | None     |

**Geometry - Navigator**

**Geometry - Tim Planning Suite**

|                   |       |
|-------------------|-------|
| Set-n-Go Protocol | Off   |
| Table position    | H     |
| Table position    | 14 mm |
| Inline Composing  | Off   |

**System - Miscellaneous**

|                   |                  |
|-------------------|------------------|
| Positioning mode  | REF              |
| Table position    | H                |
| Table position    | 14 mm            |
| MSMA              | S - C - T        |
| Sagittal          | L >> R           |
| Coronal           | A >> P           |
| Transversal       | H >> F           |
| Coil Combine Mode | Adaptive Combine |

### System - Miscellaneous

|                     |                      |
|---------------------|----------------------|
| Matrix Optimization | Off                  |
| AutoAlign           | ---                  |
| Coil Select Mode    | Off - AutoCoilSelect |

### System - Adjustments

|                          |          |
|--------------------------|----------|
| B0 Shim mode             | Standard |
| B1 Shim mode             | TrueForm |
| Adjust with body coil    | Off      |
| Confirm freq. adjustment | Off      |
| Assume Dominant Fat      | Off      |
| Assume Silicone          | Off      |
| Adjustment Tolerance     | Auto     |

### System - Adjust Volume

|             |                    |
|-------------|--------------------|
| Position    | L2.2 P5.2 H52.0 mm |
| Orientation | T > C5.2           |
| Rotation    | 0.00 deg           |
| A >> P      | 50 mm              |
| R >> L      | 64 mm              |
| F >> H      | 60 mm              |
| Reset       | Off                |
| Couple to   | Acquisition volume |

### System - pTx Volumes

|                 |                    |
|-----------------|--------------------|
| B1 Shim mode    | TrueForm           |
| Excitation      | ZOOMit             |
| pTx Volume      | 1                  |
| Vol. Property   | Optimization Vol.  |
| Position        | L2.2 P5.2 H52.0 mm |
| Orientation     | T > C5.2           |
| Rotation        | 0 deg              |
| A >> P          | 250 mm             |
| R >> L          | 64 mm              |
| F >> H          | 60 mm              |
| Vol. Visibility | On                 |

### System - Tx/Rx

|                     |                |
|---------------------|----------------|
| Frequency 1H        | 123.256882 MHz |
| Correction factor   | 1              |
| Gain                | High           |
| Img. Scale Cor.     | 1.000          |
| Reset               | Off            |
| ? Ref. amplitude 1H | 0.000 V        |

### Physio - Signal1

|                    |               |
|--------------------|---------------|
| 1st Signal/Mode    | Pulse/Trigger |
| Average cycle      | 969 ± 29 ms   |
| Average cycle      | 985 ± 29 ms   |
| Acquisition window | 650 ms        |
| Trigger pulse      | 1             |
| Trigger delay      | 200 ms        |
| TR                 | 270 ms        |
| Concatenations     | 12            |
| Phases             | 1             |

### Physio - PACE

|                |     |
|----------------|-----|
| Resp. control  | Off |
| Concatenations | 12  |

### Diff - Neuro

|                  |           |
|------------------|-----------|
| Diffusion mode   | MDDW      |
| Diff. directions | 30        |
| Diffusion Scheme | Monopolar |

### Diff - Neuro

|                       |                     |
|-----------------------|---------------------|
| Diff. weightings      | 1                   |
| b-value               | 0 s/mm <sup>2</sup> |
| b-value               | 1                   |
| Diff. weighted images | On                  |
| Trace weighted images | Off                 |
| ADC maps              | Off                 |
| FA maps               | Off                 |
| Mosaic                | Off                 |
| Tensor                | Off                 |
| Noise level           | 0                   |

### Diff - Body

|                       |                     |
|-----------------------|---------------------|
| Diffusion mode        | MDDW                |
| Diff. directions      | 30                  |
| Diffusion Scheme      | Monopolar           |
| Diff. weightings      | 1                   |
| b-value               | 0 s/mm <sup>2</sup> |
| b-value               | 1                   |
| Diff. weighted images | On                  |
| Trace weighted images | Off                 |
| ADC maps              | Off                 |
| Exponential ADC Maps  | Off                 |
| FA maps               | Off                 |
| Invert Gray Scale     | Off                 |
| Calculated Image      | Off                 |
| b-Value >=            | 0 s/mm <sup>2</sup> |
| Noise level           | 0                   |

### Diff - Composing

|                  |     |
|------------------|-----|
| Inline Composing | Off |
| Distortion Corr. | Off |

### Sequence - Part 1

|                   |             |
|-------------------|-------------|
| Introduction      | On          |
| Optimization      | None        |
| Multi-slice mode  | Interleaved |
| Free echo spacing | Off         |
| Echo spacing      | 0.93 ms     |
| Bandwidth         | 1240 Hz/Px  |

### Sequence - Part 2

|               |             |
|---------------|-------------|
| EPI factor    | 50          |
| RF pulse type | Normal      |
| Gradient mode | Performance |
| Excitation    | ZOOMit      |

### Sequence - pTX Pulses

|                 |     |
|-----------------|-----|
| pTX Pulse       | 1   |
| TX acceleration | 1.0 |

\*\*\*\*\* Multi-TE, TE = 105 ms \*\*\*\*\*

**Properties**

|                                               |                    |
|-----------------------------------------------|--------------------|
| Prio recon                                    | Off                |
| Load images to viewer                         | On                 |
| Inline movie                                  | Off                |
| Auto store images                             | On                 |
| Load images to stamp segments                 | Off                |
| Load images to graphic segments               | Off                |
| Auto open inline display                      | Off                |
| Auto close inline display                     | Off                |
| Start measurement without further preparation | Off                |
| Wait for user to start                        | Off                |
| Start measurements                            | Single measurement |

**Routine**

|                    |                                  |
|--------------------|----------------------------------|
| Slice group        | 1                                |
| Slices             | 12                               |
| Dist. factor       | 0 %                              |
| Position           | L2.2 P5.2 H52.0 mm               |
| Orientation        | T > C5.2                         |
| Phase enc. dir.    | A >> P                           |
| AutoAlign          | ---                              |
| Phase oversampling | 0 %                              |
| FoV read           | 64 mm                            |
| FoV phase          | 78.1 %                           |
| Slice thickness    | 5.0 mm                           |
| TR                 | 270 ms                           |
| TE                 | 105.0 ms                         |
| Averages           | 1                                |
| Concatenations     | 12                               |
| Filter             | Raw filter, Prescan<br>Normalize |
| Coil elements      | HC7;NC1,2                        |

**Contrast - Common**

|                   |          |
|-------------------|----------|
| TR                | 270 ms   |
| TE                | 105.0 ms |
| MTC               | Off      |
| Magn. preparation | None     |
| Fat suppr.        | Fat sat. |
| Fat sat. mode     | Strong   |

**Contrast - Dynamic**

|                 |           |
|-----------------|-----------|
| Averages        | 1         |
| Averaging mode  | Long term |
| Reconstruction  | Magnitude |
| Measurements    | 1         |
| Delay in TR     | 0 ms      |
| Multiple series | Off       |

**Resolution - Common**

|                       |        |
|-----------------------|--------|
| FoV read              | 64 mm  |
| FoV phase             | 78.1 % |
| Slice thickness       | 5.0 mm |
| Base resolution       | 64     |
| Phase resolution      | 100 %  |
| Phase partial Fourier | 6/8    |
| Interpolation         | Off    |

**Resolution - iPAT**

|             |      |
|-------------|------|
| Accel. mode | None |
|-------------|------|

**Resolution - Filter Image**

|                     |     |
|---------------------|-----|
| Distortion Corr.    | Off |
| Prescan Normalize   | On  |
| Dynamic Field Corr. | Off |

**Resolution - Filter Rawdata**

|                   |     |
|-------------------|-----|
| Raw filter        | On  |
| Elliptical filter | Off |

**Geometry - Common**

|                  |                    |
|------------------|--------------------|
| Slice group      | 1                  |
| Slices           | 12                 |
| Dist. factor     | 0 %                |
| Position         | L2.2 P5.2 H52.0 mm |
| Orientation      | T > C5.2           |
| Phase enc. dir.  | A >> P             |
| FoV read         | 64 mm              |
| FoV phase        | 78.1 %             |
| Slice thickness  | 5.0 mm             |
| TR               | 270 ms             |
| Multi-slice mode | Interleaved        |
| Series           | Interleaved        |
| Concatenations   | 12                 |

**Geometry - AutoAlign**

|                     |                    |
|---------------------|--------------------|
| Slice group         | 1                  |
| Position            | L2.2 P5.2 H52.0 mm |
| Orientation         | T > C5.2           |
| Phase enc. dir.     | A >> P             |
| AutoAlign           | ---                |
| Initial Position    | L2.2 P5.2 H38.0    |
| Phase               | 8.6 mm             |
| Read                | -2.2 mm            |
| Shift               | 37.4 mm            |
| Initial Rotation    | 0.00 deg           |
| Initial Orientation | T > C              |
| T > C               | 5.2                |
| > S                 | 0.0                |

**Geometry - Saturation**

|               |          |
|---------------|----------|
| Fat suppr.    | Fat sat. |
| Fat sat. mode | Strong   |
| Special sat.  | None     |

**Geometry - Navigator**

**Geometry - Tim Planning Suite**

|                   |       |
|-------------------|-------|
| Set-n-Go Protocol | Off   |
| Table position    | H     |
| Table position    | 14 mm |
| Inline Composing  | Off   |

**System - Miscellaneous**

|                   |                  |
|-------------------|------------------|
| Positioning mode  | REF              |
| Table position    | H                |
| Table position    | 14 mm            |
| MSMA              | S - C - T        |
| Sagittal          | L >> R           |
| Coronal           | A >> P           |
| Transversal       | H >> F           |
| Coil Combine Mode | Adaptive Combine |

### System - Miscellaneous

|                     |                      |
|---------------------|----------------------|
| Matrix Optimization | Off                  |
| AutoAlign           | ---                  |
| Coil Select Mode    | Off - AutoCoilSelect |

### System - Adjustments

|                          |          |
|--------------------------|----------|
| B0 Shim mode             | Standard |
| B1 Shim mode             | TrueForm |
| Adjust with body coil    | Off      |
| Confirm freq. adjustment | Off      |
| Assume Dominant Fat      | Off      |
| Assume Silicone          | Off      |
| Adjustment Tolerance     | Auto     |

### System - Adjust Volume

|             |                    |
|-------------|--------------------|
| Position    | L2.2 P5.2 H52.0 mm |
| Orientation | T > C5.2           |
| Rotation    | 0.00 deg           |
| A >> P      | 50 mm              |
| R >> L      | 64 mm              |
| F >> H      | 60 mm              |
| Reset       | Off                |
| Couple to   | Acquisition volume |

### System - pTx Volumes

|                 |                    |
|-----------------|--------------------|
| B1 Shim mode    | TrueForm           |
| Excitation      | ZOOMit             |
| pTx Volume      | 1                  |
| Vol. Property   | Optimization Vol.  |
| Position        | L2.2 P5.2 H52.0 mm |
| Orientation     | T > C5.2           |
| Rotation        | 0 deg              |
| A >> P          | 250 mm             |
| R >> L          | 64 mm              |
| F >> H          | 60 mm              |
| Vol. Visibility | On                 |

### System - Tx/Rx

|                     |                |
|---------------------|----------------|
| Frequency 1H        | 123.256882 MHz |
| Correction factor   | 1              |
| Gain                | High           |
| Img. Scale Cor.     | 1.000          |
| Reset               | Off            |
| ? Ref. amplitude 1H | 0.000 V        |

### Physio - Signal1

|                    |               |
|--------------------|---------------|
| 1st Signal/Mode    | Pulse/Trigger |
| Average cycle      | 969 ± 36 ms   |
| Average cycle      | 968 ± 36 ms   |
| Acquisition window | 650 ms        |
| Trigger pulse      | 1             |
| Trigger delay      | 200 ms        |
| TR                 | 270 ms        |
| Concatenations     | 12            |
| Phases             | 1             |

### Physio - PACE

|                |     |
|----------------|-----|
| Resp. control  | Off |
| Concatenations | 12  |

### Diff - Neuro

|                  |           |
|------------------|-----------|
| Diffusion mode   | MDDW      |
| Diff. directions | 30        |
| Diffusion Scheme | Monopolar |

### Diff - Neuro

|                       |                     |
|-----------------------|---------------------|
| Diff. weightings      | 1                   |
| b-value               | 0 s/mm <sup>2</sup> |
| b-value               | 1                   |
| Diff. weighted images | On                  |
| Trace weighted images | Off                 |
| ADC maps              | Off                 |
| FA maps               | Off                 |
| Mosaic                | Off                 |
| Tensor                | Off                 |
| Noise level           | 0                   |

### Diff - Body

|                       |                     |
|-----------------------|---------------------|
| Diffusion mode        | MDDW                |
| Diff. directions      | 30                  |
| Diffusion Scheme      | Monopolar           |
| Diff. weightings      | 1                   |
| b-value               | 0 s/mm <sup>2</sup> |
| b-value               | 1                   |
| Diff. weighted images | On                  |
| Trace weighted images | Off                 |
| ADC maps              | Off                 |
| Exponential ADC Maps  | Off                 |
| FA maps               | Off                 |
| Invert Gray Scale     | Off                 |
| Calculated Image      | Off                 |
| b-Value >=            | 0 s/mm <sup>2</sup> |
| Noise level           | 0                   |

### Diff - Composing

|                  |     |
|------------------|-----|
| Inline Composing | Off |
| Distortion Corr. | Off |

### Sequence - Part 1

|                   |             |
|-------------------|-------------|
| Introduction      | On          |
| Optimization      | None        |
| Multi-slice mode  | Interleaved |
| Free echo spacing | Off         |
| Echo spacing      | 0.93 ms     |
| Bandwidth         | 1240 Hz/Px  |

### Sequence - Part 2

|               |             |
|---------------|-------------|
| EPI factor    | 50          |
| RF pulse type | Normal      |
| Gradient mode | Performance |
| Excitation    | ZOOMit      |

### Sequence - pTX Pulses

|                 |     |
|-----------------|-----|
| pTX Pulse       | 1   |
| TX acceleration | 1.0 |

\*\*\*\*\* Multi-TE, TE = 90 ms \*\*\*\*\*

**Properties**

|                                               |                    |
|-----------------------------------------------|--------------------|
| Prio recon                                    | Off                |
| Load images to viewer                         | On                 |
| Inline movie                                  | Off                |
| Auto store images                             | On                 |
| Load images to stamp segments                 | Off                |
| Load images to graphic segments               | Off                |
| Auto open inline display                      | Off                |
| Auto close inline display                     | Off                |
| Start measurement without further preparation | Off                |
| Wait for user to start                        | Off                |
| Start measurements                            | Single measurement |

**Routine**

|                    |                               |
|--------------------|-------------------------------|
| Slice group        | 1                             |
| Slices             | 12                            |
| Dist. factor       | 0 %                           |
| Position           | L2.2 P5.2 H52.0 mm            |
| Orientation        | T > C5.2                      |
| Phase enc. dir.    | A >> P                        |
| AutoAlign          | ---                           |
| Phase oversampling | 0 %                           |
| FoV read           | 64 mm                         |
| FoV phase          | 78.1 %                        |
| Slice thickness    | 5.0 mm                        |
| TR                 | 270 ms                        |
| TE                 | 90.0 ms                       |
| Averages           | 1                             |
| Concatenations     | 12                            |
| Filter             | Raw filter, Prescan Normalize |
| Coil elements      | HC7;NC1,2                     |

**Contrast - Common**

|                   |          |
|-------------------|----------|
| TR                | 270 ms   |
| TE                | 90.0 ms  |
| MTC               | Off      |
| Magn. preparation | None     |
| Fat suppr.        | Fat sat. |
| Fat sat. mode     | Strong   |

**Contrast - Dynamic**

|                 |           |
|-----------------|-----------|
| Averages        | 1         |
| Averaging mode  | Long term |
| Reconstruction  | Magnitude |
| Measurements    | 1         |
| Delay in TR     | 0 ms      |
| Multiple series | Off       |

**Resolution - Common**

|                       |        |
|-----------------------|--------|
| FoV read              | 64 mm  |
| FoV phase             | 78.1 % |
| Slice thickness       | 5.0 mm |
| Base resolution       | 64     |
| Phase resolution      | 100 %  |
| Phase partial Fourier | 6/8    |
| Interpolation         | Off    |

**Resolution - iPAT**

|             |      |
|-------------|------|
| Accel. mode | None |
|-------------|------|

**Resolution - Filter Image**

|                     |     |
|---------------------|-----|
| Distortion Corr.    | Off |
| Prescan Normalize   | On  |
| Dynamic Field Corr. | Off |

**Resolution - Filter Rawdata**

|                   |     |
|-------------------|-----|
| Raw filter        | On  |
| Elliptical filter | Off |

**Geometry - Common**

|                  |                    |
|------------------|--------------------|
| Slice group      | 1                  |
| Slices           | 12                 |
| Dist. factor     | 0 %                |
| Position         | L2.2 P5.2 H52.0 mm |
| Orientation      | T > C5.2           |
| Phase enc. dir.  | A >> P             |
| FoV read         | 64 mm              |
| FoV phase        | 78.1 %             |
| Slice thickness  | 5.0 mm             |
| TR               | 270 ms             |
| Multi-slice mode | Interleaved        |
| Series           | Interleaved        |
| Concatenations   | 12                 |

**Geometry - AutoAlign**

|                     |                    |
|---------------------|--------------------|
| Slice group         | 1                  |
| Position            | L2.2 P5.2 H52.0 mm |
| Orientation         | T > C5.2           |
| Phase enc. dir.     | A >> P             |
| AutoAlign           | ---                |
| Initial Position    | L2.2 P5.2 H38.0    |
| Phase               | 8.6 mm             |
| Read                | -2.2 mm            |
| Shift               | 37.4 mm            |
| Initial Rotation    | 0.00 deg           |
| Initial Orientation | T > C              |
| T > C               | 5.2                |
| > S                 | 0.0                |

**Geometry - Saturation**

|               |          |
|---------------|----------|
| Fat suppr.    | Fat sat. |
| Fat sat. mode | Strong   |
| Special sat.  | None     |

**Geometry - Navigator**

**Geometry - Tim Planning Suite**

|                   |       |
|-------------------|-------|
| Set-n-Go Protocol | Off   |
| Table position    | H     |
| Table position    | 14 mm |
| Inline Composing  | Off   |

**System - Miscellaneous**

|                   |                  |
|-------------------|------------------|
| Positioning mode  | REF              |
| Table position    | H                |
| Table position    | 14 mm            |
| MSMA              | S - C - T        |
| Sagittal          | L >> R           |
| Coronal           | A >> P           |
| Transversal       | H >> F           |
| Coil Combine Mode | Adaptive Combine |

### System - Miscellaneous

|                     |                      |
|---------------------|----------------------|
| Matrix Optimization | Off                  |
| AutoAlign           | ---                  |
| Coil Select Mode    | Off - AutoCoilSelect |

### System - Adjustments

|                          |          |
|--------------------------|----------|
| B0 Shim mode             | Standard |
| B1 Shim mode             | TrueForm |
| Adjust with body coil    | Off      |
| Confirm freq. adjustment | Off      |
| Assume Dominant Fat      | Off      |
| Assume Silicone          | Off      |
| Adjustment Tolerance     | Auto     |

### System - Adjust Volume

|             |                    |
|-------------|--------------------|
| Position    | L2.2 P5.2 H52.0 mm |
| Orientation | T > C5.2           |
| Rotation    | 0.00 deg           |
| A >> P      | 50 mm              |
| R >> L      | 64 mm              |
| F >> H      | 60 mm              |
| Reset       | Off                |
| Couple to   | Acquisition volume |

### System - pTx Volumes

|                 |                    |
|-----------------|--------------------|
| B1 Shim mode    | TrueForm           |
| Excitation      | ZOOMit             |
| pTx Volume      | 1                  |
| Vol. Property   | Optimization Vol.  |
| Position        | L2.2 P5.2 H52.0 mm |
| Orientation     | T > C5.2           |
| Rotation        | 0 deg              |
| A >> P          | 250 mm             |
| R >> L          | 64 mm              |
| F >> H          | 60 mm              |
| Vol. Visibility | On                 |

### System - Tx/Rx

|                     |                |
|---------------------|----------------|
| Frequency 1H        | 123.256882 MHz |
| Correction factor   | 1              |
| Gain                | High           |
| Img. Scale Cor.     | 1.000          |
| Reset               | Off            |
| ? Ref. amplitude 1H | 0.000 V        |

### Physio - Signal1

|                    |               |
|--------------------|---------------|
| 1st Signal/Mode    | Pulse/Trigger |
| Average cycle      | 968 ± 34 ms   |
| Average cycle      | 958 ± 34 ms   |
| Acquisition window | 650 ms        |
| Trigger pulse      | 1             |
| Trigger delay      | 200 ms        |
| TR                 | 270 ms        |
| Concatenations     | 12            |
| Phases             | 1             |

### Physio - PACE

|                |     |
|----------------|-----|
| Resp. control  | Off |
| Concatenations | 12  |

### Diff - Neuro

|                  |           |
|------------------|-----------|
| Diffusion mode   | MDDW      |
| Diff. directions | 30        |
| Diffusion Scheme | Monopolar |

### Diff - Neuro

|                       |                     |
|-----------------------|---------------------|
| Diff. weightings      | 1                   |
| b-value               | 0 s/mm <sup>2</sup> |
| b-value               | 1                   |
| Diff. weighted images | On                  |
| Trace weighted images | Off                 |
| ADC maps              | Off                 |
| FA maps               | Off                 |
| Mosaic                | Off                 |
| Tensor                | Off                 |
| Noise level           | 0                   |

### Diff - Body

|                       |                     |
|-----------------------|---------------------|
| Diffusion mode        | MDDW                |
| Diff. directions      | 30                  |
| Diffusion Scheme      | Monopolar           |
| Diff. weightings      | 1                   |
| b-value               | 0 s/mm <sup>2</sup> |
| b-value               | 1                   |
| Diff. weighted images | On                  |
| Trace weighted images | Off                 |
| ADC maps              | Off                 |
| Exponential ADC Maps  | Off                 |
| FA maps               | Off                 |
| Invert Gray Scale     | Off                 |
| Calculated Image      | Off                 |
| b-Value >=            | 0 s/mm <sup>2</sup> |
| Noise level           | 0                   |

### Diff - Composing

|                  |     |
|------------------|-----|
| Inline Composing | Off |
| Distortion Corr. | Off |

### Sequence - Part 1

|                   |             |
|-------------------|-------------|
| Introduction      | On          |
| Optimization      | None        |
| Multi-slice mode  | Interleaved |
| Free echo spacing | Off         |
| Echo spacing      | 0.93 ms     |
| Bandwidth         | 1240 Hz/Px  |

### Sequence - Part 2

|               |             |
|---------------|-------------|
| EPI factor    | 50          |
| RF pulse type | Normal      |
| Gradient mode | Performance |
| Excitation    | ZOOMit      |

### Sequence - pTX Pulses

|                 |     |
|-----------------|-----|
| pTX Pulse       | 1   |
| TX acceleration | 1.0 |

\*\*\*\*\* Multi-TE, TE = 75 ms \*\*\*\*\*

**Properties**

|                                               |                    |
|-----------------------------------------------|--------------------|
| Prio recon                                    | Off                |
| Load images to viewer                         | On                 |
| Inline movie                                  | Off                |
| Auto store images                             | On                 |
| Load images to stamp segments                 | Off                |
| Load images to graphic segments               | Off                |
| Auto open inline display                      | Off                |
| Auto close inline display                     | Off                |
| Start measurement without further preparation | Off                |
| Wait for user to start                        | Off                |
| Start measurements                            | Single measurement |

**Routine**

|                    |                               |
|--------------------|-------------------------------|
| Slice group        | 1                             |
| Slices             | 12                            |
| Dist. factor       | 0 %                           |
| Position           | L2.2 P5.2 H52.0 mm            |
| Orientation        | T > C5.2                      |
| Phase enc. dir.    | A >> P                        |
| AutoAlign          | ---                           |
| Phase oversampling | 0 %                           |
| FoV read           | 64 mm                         |
| FoV phase          | 78.1 %                        |
| Slice thickness    | 5.0 mm                        |
| TR                 | 270 ms                        |
| TE                 | 75.0 ms                       |
| Averages           | 1                             |
| Concatenations     | 12                            |
| Filter             | Raw filter, Prescan Normalize |
| Coil elements      | HC7;NC1,2                     |

**Contrast - Common**

|                   |          |
|-------------------|----------|
| TR                | 270 ms   |
| TE                | 75.0 ms  |
| MTC               | Off      |
| Magn. preparation | None     |
| Fat suppr.        | Fat sat. |
| Fat sat. mode     | Strong   |

**Contrast - Dynamic**

|                 |           |
|-----------------|-----------|
| Averages        | 1         |
| Averaging mode  | Long term |
| Reconstruction  | Magnitude |
| Measurements    | 1         |
| Delay in TR     | 0 ms      |
| Multiple series | Off       |

**Resolution - Common**

|                       |        |
|-----------------------|--------|
| FoV read              | 64 mm  |
| FoV phase             | 78.1 % |
| Slice thickness       | 5.0 mm |
| Base resolution       | 64     |
| Phase resolution      | 100 %  |
| Phase partial Fourier | 6/8    |
| Interpolation         | Off    |

**Resolution - iPAT**

|             |      |
|-------------|------|
| Accel. mode | None |
|-------------|------|

**Resolution - Filter Image**

|                     |     |
|---------------------|-----|
| Distortion Corr.    | Off |
| Prescan Normalize   | On  |
| Dynamic Field Corr. | Off |

**Resolution - Filter Rawdata**

|                   |     |
|-------------------|-----|
| Raw filter        | On  |
| Elliptical filter | Off |

**Geometry - Common**

|                  |                    |
|------------------|--------------------|
| Slice group      | 1                  |
| Slices           | 12                 |
| Dist. factor     | 0 %                |
| Position         | L2.2 P5.2 H52.0 mm |
| Orientation      | T > C5.2           |
| Phase enc. dir.  | A >> P             |
| FoV read         | 64 mm              |
| FoV phase        | 78.1 %             |
| Slice thickness  | 5.0 mm             |
| TR               | 270 ms             |
| Multi-slice mode | Interleaved        |
| Series           | Interleaved        |
| Concatenations   | 12                 |

**Geometry - AutoAlign**

|                     |                    |
|---------------------|--------------------|
| Slice group         | 1                  |
| Position            | L2.2 P5.2 H52.0 mm |
| Orientation         | T > C5.2           |
| Phase enc. dir.     | A >> P             |
| AutoAlign           | ---                |
| Initial Position    | L2.2 P5.2 H38.0    |
| Phase               | 8.6 mm             |
| Read                | -2.2 mm            |
| Shift               | 37.4 mm            |
| Initial Rotation    | 0.00 deg           |
| Initial Orientation | T > C              |
| T > C               | 5.2                |
| > S                 | 0.0                |

**Geometry - Saturation**

|               |          |
|---------------|----------|
| Fat suppr.    | Fat sat. |
| Fat sat. mode | Strong   |
| Special sat.  | None     |

**Geometry - Navigator**

**Geometry - Tim Planning Suite**

|                   |       |
|-------------------|-------|
| Set-n-Go Protocol | Off   |
| Table position    | H     |
| Table position    | 14 mm |
| Inline Composing  | Off   |

**System - Miscellaneous**

|                   |                  |
|-------------------|------------------|
| Positioning mode  | REF              |
| Table position    | H                |
| Table position    | 14 mm            |
| MSMA              | S - C - T        |
| Sagittal          | L >> R           |
| Coronal           | A >> P           |
| Transversal       | H >> F           |
| Coil Combine Mode | Adaptive Combine |



### System - Miscellaneous

|                     |                      |
|---------------------|----------------------|
| Matrix Optimization | Off                  |
| AutoAlign           | ---                  |
| Coil Select Mode    | Off - AutoCoilSelect |

### System - Adjustments

|                          |          |
|--------------------------|----------|
| B0 Shim mode             | Standard |
| B1 Shim mode             | TrueForm |
| Adjust with body coil    | Off      |
| Confirm freq. adjustment | Off      |
| Assume Dominant Fat      | Off      |
| Assume Silicone          | Off      |
| Adjustment Tolerance     | Auto     |

### System - Adjust Volume

|             |                    |
|-------------|--------------------|
| Position    | L2.2 P5.2 H52.0 mm |
| Orientation | T > C5.2           |
| Rotation    | 0.00 deg           |
| A >> P      | 50 mm              |
| R >> L      | 64 mm              |
| F >> H      | 60 mm              |
| Reset       | Off                |
| Couple to   | Acquisition volume |

### System - pTx Volumes

|                 |                    |
|-----------------|--------------------|
| B1 Shim mode    | TrueForm           |
| Excitation      | ZOOMit             |
| pTx Volume      | 1                  |
| Vol. Property   | Optimization Vol.  |
| Position        | L2.2 P5.2 H52.0 mm |
| Orientation     | T > C5.2           |
| Rotation        | 0 deg              |
| A >> P          | 250 mm             |
| R >> L          | 64 mm              |
| F >> H          | 60 mm              |
| Vol. Visibility | On                 |

### System - Tx/Rx

|                     |                |
|---------------------|----------------|
| Frequency 1H        | 123.256882 MHz |
| Correction factor   | 1              |
| Gain                | High           |
| Img. Scale Cor.     | 1.000          |
| Reset               | Off            |
| ? Ref. amplitude 1H | 0.000 V        |

### Physio - Signal1

|                    |               |
|--------------------|---------------|
| 1st Signal/Mode    | Pulse/Trigger |
| Average cycle      | 967 ± 33 ms   |
| Average cycle      | 967 ± 33 ms   |
| Acquisition window | 650 ms        |
| Trigger pulse      | 1             |
| Trigger delay      | 200 ms        |
| TR                 | 270 ms        |
| Concatenations     | 12            |
| Phases             | 1             |

### Physio - PACE

|                |     |
|----------------|-----|
| Resp. control  | Off |
| Concatenations | 12  |

### Diff - Neuro

|                  |           |
|------------------|-----------|
| Diffusion mode   | MDDW      |
| Diff. directions | 30        |
| Diffusion Scheme | Monopolar |

### Diff - Neuro

|                       |                     |
|-----------------------|---------------------|
| Diff. weightings      | 1                   |
| b-value               | 0 s/mm <sup>2</sup> |
| b-value               | 1                   |
| Diff. weighted images | On                  |
| Trace weighted images | Off                 |
| ADC maps              | Off                 |
| FA maps               | Off                 |
| Mosaic                | Off                 |
| Tensor                | Off                 |
| Noise level           | 0                   |

### Diff - Body

|                       |                     |
|-----------------------|---------------------|
| Diffusion mode        | MDDW                |
| Diff. directions      | 30                  |
| Diffusion Scheme      | Monopolar           |
| Diff. weightings      | 1                   |
| b-value               | 0 s/mm <sup>2</sup> |
| b-value               | 1                   |
| Diff. weighted images | On                  |
| Trace weighted images | Off                 |
| ADC maps              | Off                 |
| Exponential ADC Maps  | Off                 |
| FA maps               | Off                 |
| Invert Gray Scale     | Off                 |
| Calculated Image      | Off                 |
| b-Value >=            | 0 s/mm <sup>2</sup> |
| Noise level           | 0                   |

### Diff - Composing

|                  |     |
|------------------|-----|
| Inline Composing | Off |
| Distortion Corr. | Off |

### Sequence - Part 1

|                   |             |
|-------------------|-------------|
| Introduction      | On          |
| Optimization      | None        |
| Multi-slice mode  | Interleaved |
| Free echo spacing | Off         |
| Echo spacing      | 0.93 ms     |
| Bandwidth         | 1240 Hz/Px  |

### Sequence - Part 2

|               |             |
|---------------|-------------|
| EPI factor    | 50          |
| RF pulse type | Normal      |
| Gradient mode | Performance |
| Excitation    | ZOOMit      |

### Sequence - pTX Pulses

|                 |     |
|-----------------|-----|
| pTX Pulse       | 1   |
| TX acceleration | 1.0 |

\*\*\*\*\* Multi-TE, TE = 60 ms \*\*\*\*\*

**Properties**

|                                               |                    |
|-----------------------------------------------|--------------------|
| Prio recon                                    | Off                |
| Load images to viewer                         | On                 |
| Inline movie                                  | Off                |
| Auto store images                             | On                 |
| Load images to stamp segments                 | Off                |
| Load images to graphic segments               | Off                |
| Auto open inline display                      | Off                |
| Auto close inline display                     | Off                |
| Start measurement without further preparation | Off                |
| Wait for user to start                        | Off                |
| Start measurements                            | Single measurement |

**Routine**

|                    |                               |
|--------------------|-------------------------------|
| Slice group        | 1                             |
| Slices             | 12                            |
| Dist. factor       | 0 %                           |
| Position           | L2.2 P5.2 H52.0 mm            |
| Orientation        | T > C5.2                      |
| Phase enc. dir.    | A >> P                        |
| AutoAlign          | ---                           |
| Phase oversampling | 0 %                           |
| FoV read           | 64 mm                         |
| FoV phase          | 78.1 %                        |
| Slice thickness    | 5.0 mm                        |
| TR                 | 270 ms                        |
| TE                 | 60.0 ms                       |
| Averages           | 1                             |
| Concatenations     | 12                            |
| Filter             | Raw filter, Prescan Normalize |
| Coil elements      | HC7;NC1,2                     |

**Contrast - Common**

|                   |          |
|-------------------|----------|
| TR                | 270 ms   |
| TE                | 60.0 ms  |
| MTC               | Off      |
| Magn. preparation | None     |
| Fat suppr.        | Fat sat. |
| Fat sat. mode     | Strong   |

**Contrast - Dynamic**

|                 |           |
|-----------------|-----------|
| Averages        | 1         |
| Averaging mode  | Long term |
| Reconstruction  | Magnitude |
| Measurements    | 1         |
| Delay in TR     | 0 ms      |
| Multiple series | Off       |

**Resolution - Common**

|                       |        |
|-----------------------|--------|
| FoV read              | 64 mm  |
| FoV phase             | 78.1 % |
| Slice thickness       | 5.0 mm |
| Base resolution       | 64     |
| Phase resolution      | 100 %  |
| Phase partial Fourier | 6/8    |
| Interpolation         | Off    |

**Resolution - iPAT**

|             |      |
|-------------|------|
| Accel. mode | None |
|-------------|------|

**Resolution - Filter Image**

|                     |     |
|---------------------|-----|
| Distortion Corr.    | Off |
| Prescan Normalize   | On  |
| Dynamic Field Corr. | Off |

**Resolution - Filter Rawdata**

|                   |     |
|-------------------|-----|
| Raw filter        | On  |
| Elliptical filter | Off |

**Geometry - Common**

|                  |                    |
|------------------|--------------------|
| Slice group      | 1                  |
| Slices           | 12                 |
| Dist. factor     | 0 %                |
| Position         | L2.2 P5.2 H52.0 mm |
| Orientation      | T > C5.2           |
| Phase enc. dir.  | A >> P             |
| FoV read         | 64 mm              |
| FoV phase        | 78.1 %             |
| Slice thickness  | 5.0 mm             |
| TR               | 270 ms             |
| Multi-slice mode | Interleaved        |
| Series           | Interleaved        |
| Concatenations   | 12                 |

**Geometry - AutoAlign**

|                     |                    |
|---------------------|--------------------|
| Slice group         | 1                  |
| Position            | L2.2 P5.2 H52.0 mm |
| Orientation         | T > C5.2           |
| Phase enc. dir.     | A >> P             |
| AutoAlign           | ---                |
| Initial Position    | L2.2 P5.2 H38.0    |
| Phase               | 8.6 mm             |
| Read                | -2.2 mm            |
| Shift               | 37.4 mm            |
| Initial Rotation    | 0.00 deg           |
| Initial Orientation | T > C              |
| T > C               | 5.2                |
| > S                 | 0.0                |

**Geometry - Saturation**

|               |          |
|---------------|----------|
| Fat suppr.    | Fat sat. |
| Fat sat. mode | Strong   |
| Special sat.  | None     |

**Geometry - Navigator**

**Geometry - Tim Planning Suite**

|                   |       |
|-------------------|-------|
| Set-n-Go Protocol | Off   |
| Table position    | H     |
| Table position    | 14 mm |
| Inline Composing  | Off   |

**System - Miscellaneous**

|                   |                  |
|-------------------|------------------|
| Positioning mode  | REF              |
| Table position    | H                |
| Table position    | 14 mm            |
| MSMA              | S - C - T        |
| Sagittal          | L >> R           |
| Coronal           | A >> P           |
| Transversal       | H >> F           |
| Coil Combine Mode | Adaptive Combine |

### System - Miscellaneous

|                     |                      |
|---------------------|----------------------|
| Matrix Optimization | Off                  |
| AutoAlign           | ---                  |
| Coil Select Mode    | Off - AutoCoilSelect |

### System - Adjustments

|                          |          |
|--------------------------|----------|
| B0 Shim mode             | Standard |
| B1 Shim mode             | TrueForm |
| Adjust with body coil    | Off      |
| Confirm freq. adjustment | Off      |
| Assume Dominant Fat      | Off      |
| Assume Silicone          | Off      |
| Adjustment Tolerance     | Auto     |

### System - Adjust Volume

|             |                    |
|-------------|--------------------|
| Position    | L2.2 P5.2 H52.0 mm |
| Orientation | T > C5.2           |
| Rotation    | 0.00 deg           |
| A >> P      | 50 mm              |
| R >> L      | 64 mm              |
| F >> H      | 60 mm              |
| Reset       | Off                |
| Couple to   | Acquisition volume |

### System - pTx Volumes

|                 |                    |
|-----------------|--------------------|
| B1 Shim mode    | TrueForm           |
| Excitation      | ZOOMit             |
| pTx Volume      | 1                  |
| Vol. Property   | Optimization Vol.  |
| Position        | L2.2 P5.2 H52.0 mm |
| Orientation     | T > C5.2           |
| Rotation        | 0 deg              |
| A >> P          | 250 mm             |
| R >> L          | 64 mm              |
| F >> H          | 60 mm              |
| Vol. Visibility | On                 |

### System - Tx/Rx

|                     |                |
|---------------------|----------------|
| Frequency 1H        | 123.256882 MHz |
| Correction factor   | 1              |
| Gain                | High           |
| Img. Scale Cor.     | 1.000          |
| Reset               | Off            |
| ? Ref. amplitude 1H | 0.000 V        |

### Physio - Signal1

|                    |               |
|--------------------|---------------|
| 1st Signal/Mode    | Pulse/Trigger |
| Average cycle      | 967 ± 32 ms   |
| Average cycle      | 971 ± 32 ms   |
| Acquisition window | 650 ms        |
| Trigger pulse      | 1             |
| Trigger delay      | 200 ms        |
| TR                 | 270 ms        |
| Concatenations     | 12            |
| Phases             | 1             |

### Physio - PACE

|                |     |
|----------------|-----|
| Resp. control  | Off |
| Concatenations | 12  |

### Diff - Neuro

|                  |           |
|------------------|-----------|
| Diffusion mode   | MDDW      |
| Diff. directions | 30        |
| Diffusion Scheme | Monopolar |

### Diff - Neuro

|                       |                     |
|-----------------------|---------------------|
| Diff. weightings      | 1                   |
| b-value               | 0 s/mm <sup>2</sup> |
| b-value               | 1                   |
| Diff. weighted images | On                  |
| Trace weighted images | Off                 |
| ADC maps              | Off                 |
| FA maps               | Off                 |
| Mosaic                | Off                 |
| Tensor                | Off                 |
| Noise level           | 0                   |

### Diff - Body

|                       |                     |
|-----------------------|---------------------|
| Diffusion mode        | MDDW                |
| Diff. directions      | 30                  |
| Diffusion Scheme      | Monopolar           |
| Diff. weightings      | 1                   |
| b-value               | 0 s/mm <sup>2</sup> |
| b-value               | 1                   |
| Diff. weighted images | On                  |
| Trace weighted images | Off                 |
| ADC maps              | Off                 |
| Exponential ADC Maps  | Off                 |
| FA maps               | Off                 |
| Invert Gray Scale     | Off                 |
| Calculated Image      | Off                 |
| b-Value >=            | 0 s/mm <sup>2</sup> |
| Noise level           | 0                   |

### Diff - Composing

|                  |     |
|------------------|-----|
| Inline Composing | Off |
| Distortion Corr. | Off |

### Sequence - Part 1

|                   |             |
|-------------------|-------------|
| Introduction      | On          |
| Optimization      | None        |
| Multi-slice mode  | Interleaved |
| Free echo spacing | Off         |
| Echo spacing      | 0.93 ms     |
| Bandwidth         | 1240 Hz/Px  |

### Sequence - Part 2

|               |             |
|---------------|-------------|
| EPI factor    | 50          |
| RF pulse type | Normal      |
| Gradient mode | Performance |
| Excitation    | ZOOMit      |

### Sequence - pTX Pulses

|                 |     |
|-----------------|-----|
| pTX Pulse       | 1   |
| TX acceleration | 1.0 |

\*\*\*\*\* Multi-TE, TE = 45 ms \*\*\*\*\*

**Properties**

|                                               |                    |
|-----------------------------------------------|--------------------|
| Prio recon                                    | Off                |
| Load images to viewer                         | On                 |
| Inline movie                                  | Off                |
| Auto store images                             | On                 |
| Load images to stamp segments                 | Off                |
| Load images to graphic segments               | Off                |
| Auto open inline display                      | Off                |
| Auto close inline display                     | Off                |
| Start measurement without further preparation | Off                |
| Wait for user to start                        | Off                |
| Start measurements                            | Single measurement |

**Routine**

|                    |                               |
|--------------------|-------------------------------|
| Slice group        | 1                             |
| Slices             | 12                            |
| Dist. factor       | 0 %                           |
| Position           | L2.2 P5.2 H52.0 mm            |
| Orientation        | T > C5.2                      |
| Phase enc. dir.    | A >> P                        |
| AutoAlign          | ---                           |
| Phase oversampling | 0 %                           |
| FoV read           | 64 mm                         |
| FoV phase          | 78.1 %                        |
| Slice thickness    | 5.0 mm                        |
| TR                 | 270 ms                        |
| TE                 | 45.0 ms                       |
| Averages           | 1                             |
| Concatenations     | 12                            |
| Filter             | Raw filter, Prescan Normalize |
| Coil elements      | HC7;NC1,2                     |

**Contrast - Common**

|                   |          |
|-------------------|----------|
| TR                | 270 ms   |
| TE                | 45.0 ms  |
| MTC               | Off      |
| Magn. preparation | None     |
| Fat suppr.        | Fat sat. |
| Fat sat. mode     | Strong   |

**Contrast - Dynamic**

|                 |           |
|-----------------|-----------|
| Averages        | 1         |
| Averaging mode  | Long term |
| Reconstruction  | Magnitude |
| Measurements    | 1         |
| Delay in TR     | 0 ms      |
| Multiple series | Off       |

**Resolution - Common**

|                       |        |
|-----------------------|--------|
| FoV read              | 64 mm  |
| FoV phase             | 78.1 % |
| Slice thickness       | 5.0 mm |
| Base resolution       | 64     |
| Phase resolution      | 100 %  |
| Phase partial Fourier | 6/8    |
| Interpolation         | Off    |

**Resolution - iPAT**

|             |      |
|-------------|------|
| Accel. mode | None |
|-------------|------|

**Resolution - Filter Image**

|                     |     |
|---------------------|-----|
| Distortion Corr.    | Off |
| Prescan Normalize   | On  |
| Dynamic Field Corr. | Off |

**Resolution - Filter Rawdata**

|                   |     |
|-------------------|-----|
| Raw filter        | On  |
| Elliptical filter | Off |

**Geometry - Common**

|                  |                    |
|------------------|--------------------|
| Slice group      | 1                  |
| Slices           | 12                 |
| Dist. factor     | 0 %                |
| Position         | L2.2 P5.2 H52.0 mm |
| Orientation      | T > C5.2           |
| Phase enc. dir.  | A >> P             |
| FoV read         | 64 mm              |
| FoV phase        | 78.1 %             |
| Slice thickness  | 5.0 mm             |
| TR               | 270 ms             |
| Multi-slice mode | Interleaved        |
| Series           | Interleaved        |
| Concatenations   | 12                 |

**Geometry - AutoAlign**

|                     |                    |
|---------------------|--------------------|
| Slice group         | 1                  |
| Position            | L2.2 P5.2 H52.0 mm |
| Orientation         | T > C5.2           |
| Phase enc. dir.     | A >> P             |
| AutoAlign           | ---                |
| Initial Position    | L2.2 P5.2 H38.0    |
| Phase               | 8.6 mm             |
| Read                | -2.2 mm            |
| Shift               | 37.4 mm            |
| Initial Rotation    | 0.00 deg           |
| Initial Orientation | T > C              |
| T > C               | 5.2                |
| > S                 | 0.0                |

**Geometry - Saturation**

|               |          |
|---------------|----------|
| Fat suppr.    | Fat sat. |
| Fat sat. mode | Strong   |
| Special sat.  | None     |

**Geometry - Navigator**

**Geometry - Tim Planning Suite**

|                   |       |
|-------------------|-------|
| Set-n-Go Protocol | Off   |
| Table position    | H     |
| Table position    | 14 mm |
| Inline Composing  | Off   |

**System - Miscellaneous**

|                   |                  |
|-------------------|------------------|
| Positioning mode  | REF              |
| Table position    | H                |
| Table position    | 14 mm            |
| MSMA              | S - C - T        |
| Sagittal          | L >> R           |
| Coronal           | A >> P           |
| Transversal       | H >> F           |
| Coil Combine Mode | Adaptive Combine |

### System - Miscellaneous

|                     |                      |
|---------------------|----------------------|
| Matrix Optimization | Off                  |
| AutoAlign           | ---                  |
| Coil Select Mode    | Off - AutoCoilSelect |

### System - Adjustments

|                          |          |
|--------------------------|----------|
| B0 Shim mode             | Standard |
| B1 Shim mode             | TrueForm |
| Adjust with body coil    | Off      |
| Confirm freq. adjustment | Off      |
| Assume Dominant Fat      | Off      |
| Assume Silicone          | Off      |
| Adjustment Tolerance     | Auto     |

### System - Adjust Volume

|             |                    |
|-------------|--------------------|
| Position    | L2.2 P5.2 H52.0 mm |
| Orientation | T > C5.2           |
| Rotation    | 0.00 deg           |
| A >> P      | 50 mm              |
| R >> L      | 64 mm              |
| F >> H      | 60 mm              |
| Reset       | Off                |
| Couple to   | Acquisition volume |

### System - pTx Volumes

|                 |                    |
|-----------------|--------------------|
| B1 Shim mode    | TrueForm           |
| Excitation      | ZOOMit             |
| pTx Volume      | 1                  |
| Vol. Property   | Optimization Vol.  |
| Position        | L2.2 P5.2 H52.0 mm |
| Orientation     | T > C5.2           |
| Rotation        | 0 deg              |
| A >> P          | 250 mm             |
| R >> L          | 64 mm              |
| F >> H          | 60 mm              |
| Vol. Visibility | On                 |

### System - Tx/Rx

|                     |                |
|---------------------|----------------|
| Frequency 1H        | 123.256882 MHz |
| Correction factor   | 1              |
| Gain                | High           |
| Img. Scale Cor.     | 1.000          |
| Reset               | Off            |
| ? Ref. amplitude 1H | 0.000 V        |

### Physio - Signal1

|                    |               |
|--------------------|---------------|
| 1st Signal/Mode    | Pulse/Trigger |
| Average cycle      | 968 ± 30 ms   |
| Average cycle      | 982 ± 30 ms   |
| Acquisition window | 650 ms        |
| Trigger pulse      | 1             |
| Trigger delay      | 200 ms        |
| TR                 | 270 ms        |
| Concatenations     | 12            |
| Phases             | 1             |

### Physio - PACE

|                |     |
|----------------|-----|
| Resp. control  | Off |
| Concatenations | 12  |

### Diff - Neuro

|                  |           |
|------------------|-----------|
| Diffusion mode   | MDDW      |
| Diff. directions | 30        |
| Diffusion Scheme | Monopolar |

### Diff - Neuro

|                       |                     |
|-----------------------|---------------------|
| Diff. weightings      | 1                   |
| b-value               | 0 s/mm <sup>2</sup> |
| b-value               | 1                   |
| Diff. weighted images | On                  |
| Trace weighted images | Off                 |
| ADC maps              | Off                 |
| FA maps               | Off                 |
| Mosaic                | Off                 |
| Tensor                | Off                 |
| Noise level           | 0                   |

### Diff - Body

|                       |                     |
|-----------------------|---------------------|
| Diffusion mode        | MDDW                |
| Diff. directions      | 30                  |
| Diffusion Scheme      | Monopolar           |
| Diff. weightings      | 1                   |
| b-value               | 0 s/mm <sup>2</sup> |
| b-value               | 1                   |
| Diff. weighted images | On                  |
| Trace weighted images | Off                 |
| ADC maps              | Off                 |
| Exponential ADC Maps  | Off                 |
| FA maps               | Off                 |
| Invert Gray Scale     | Off                 |
| Calculated Image      | Off                 |
| b-Value >=            | 0 s/mm <sup>2</sup> |
| Noise level           | 0                   |

### Diff - Composing

|                  |     |
|------------------|-----|
| Inline Composing | Off |
| Distortion Corr. | Off |

### Sequence - Part 1

|                   |             |
|-------------------|-------------|
| Introduction      | On          |
| Optimization      | None        |
| Multi-slice mode  | Interleaved |
| Free echo spacing | Off         |
| Echo spacing      | 0.93 ms     |
| Bandwidth         | 1240 Hz/Px  |

### Sequence - Part 2

|               |             |
|---------------|-------------|
| EPI factor    | 50          |
| RF pulse type | Normal      |
| Gradient mode | Performance |
| Excitation    | ZOOMit      |

### Sequence - pTX Pulses

|                 |     |
|-----------------|-----|
| pTX Pulse       | 1   |
| TX acceleration | 1.0 |
