# Supplementary material
Source: PubMed Central journal article supplement (PMC8564316)
Supplement: mmc6.pdf [file mmc6.pdf]

# Supplementary material S5

## Distribution of residuals

This document illustrates distribution of normalised denoising residuals (i.e. denoising output – denoising input, normalised by the estimated noise  $\sigma$ ). Distributions are plotted in the semi-log scales against the squared residuals. In this plot, a Gaussian distribution appears as a straight line of slope  $-\frac{1}{2}$  (labelled as “Reference” in the legends).

The document reports distributions from both simulated and in vivo scans.

### Simulations

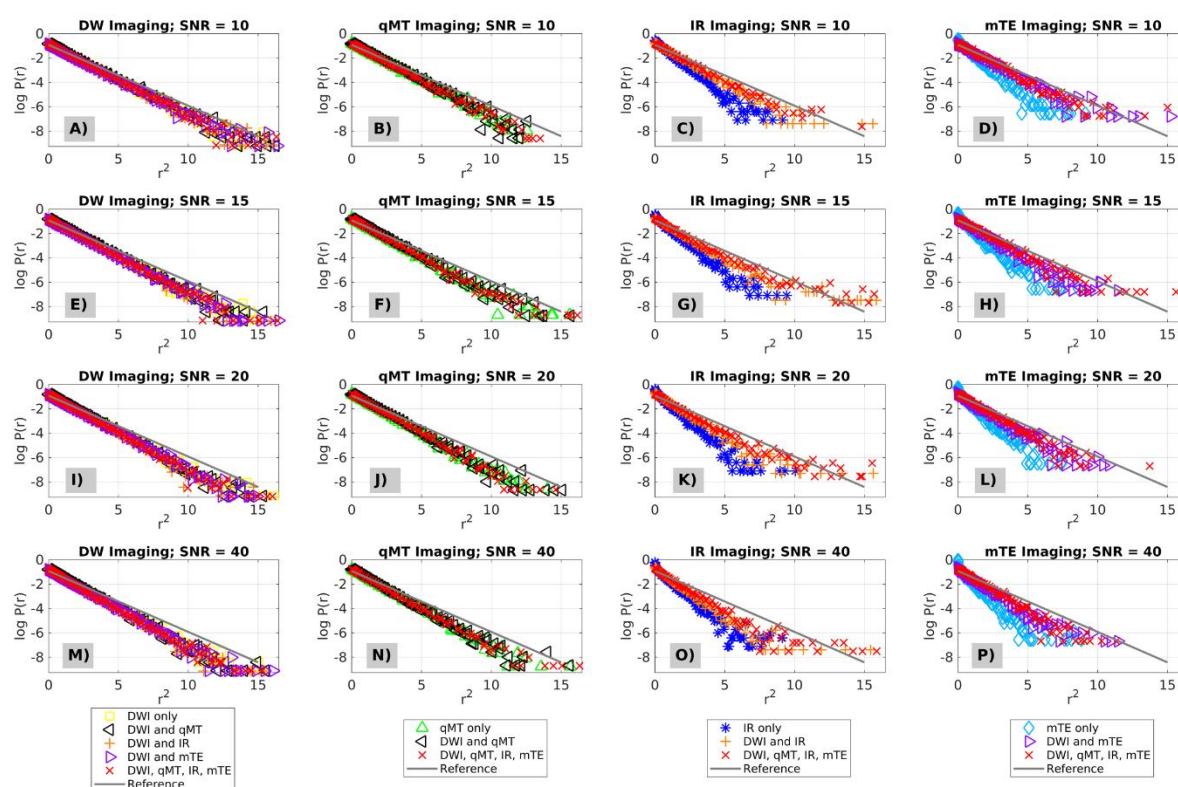

Fig. S5.1. Examples of distributions of residuals from simulations (Gaussian noise).

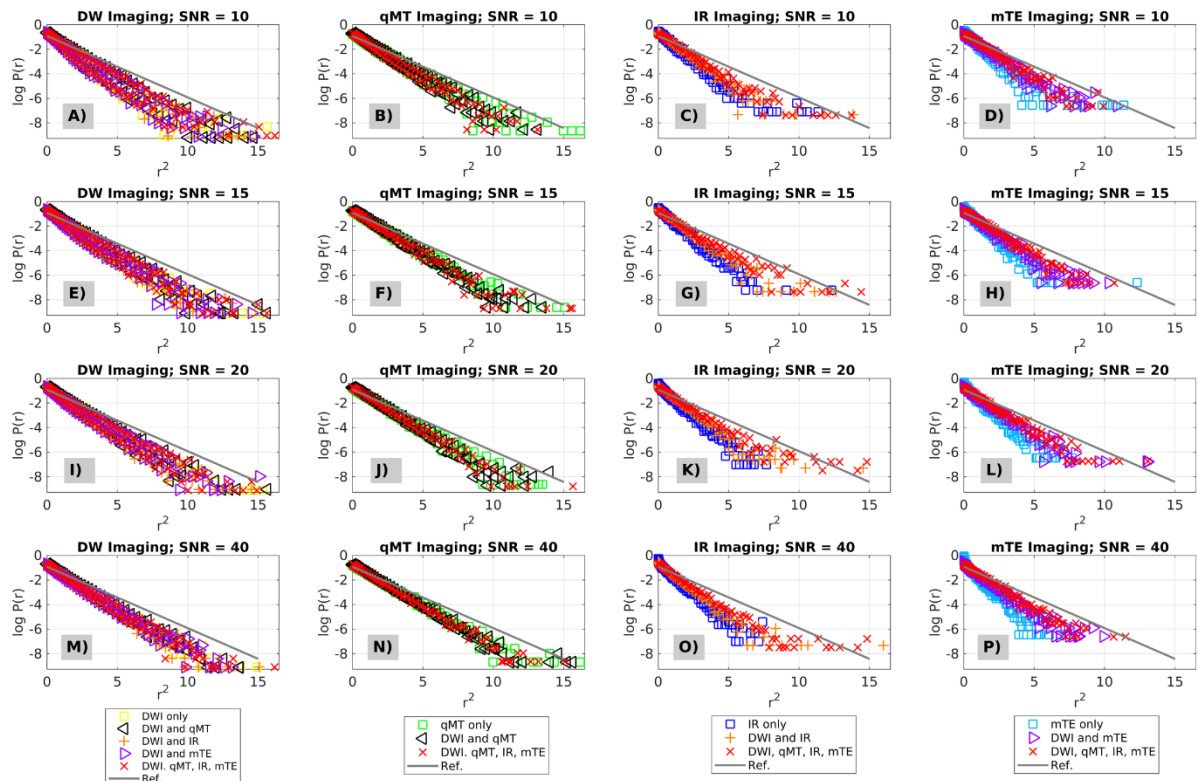

**Fig. S5.2.** Examples of distributions of residuals from simulations (Rician noise).

# In vivo

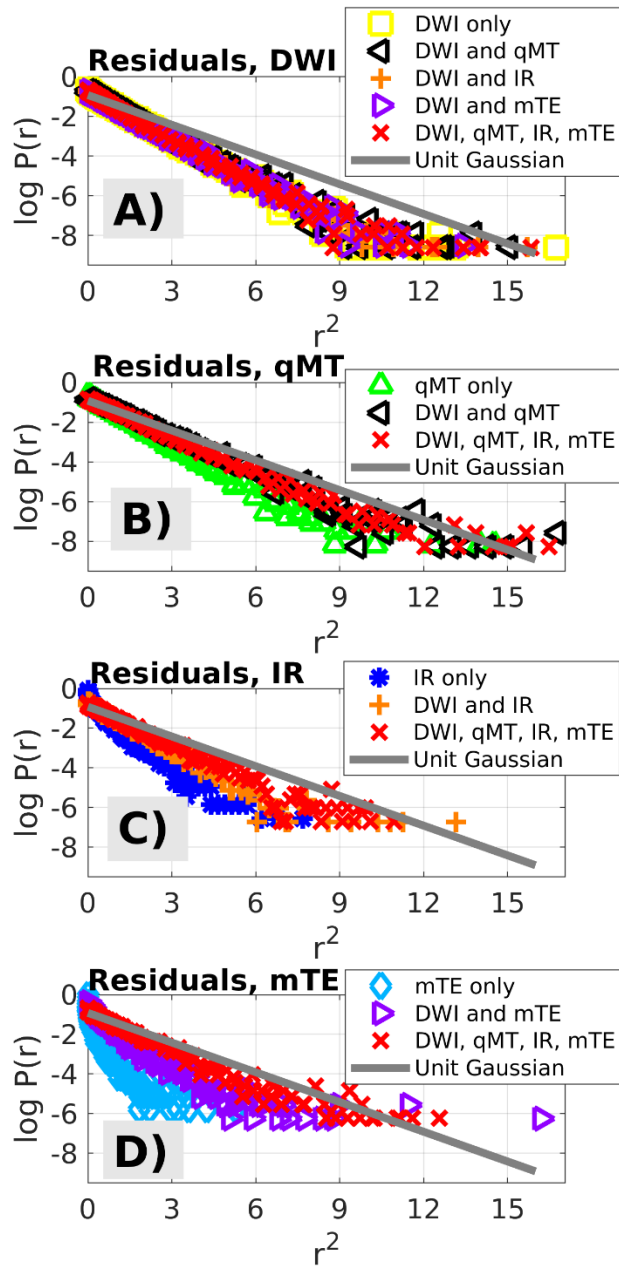

Fig. S5.3. Examples of distributions of residuals from in vivo data (vendor 1, London).

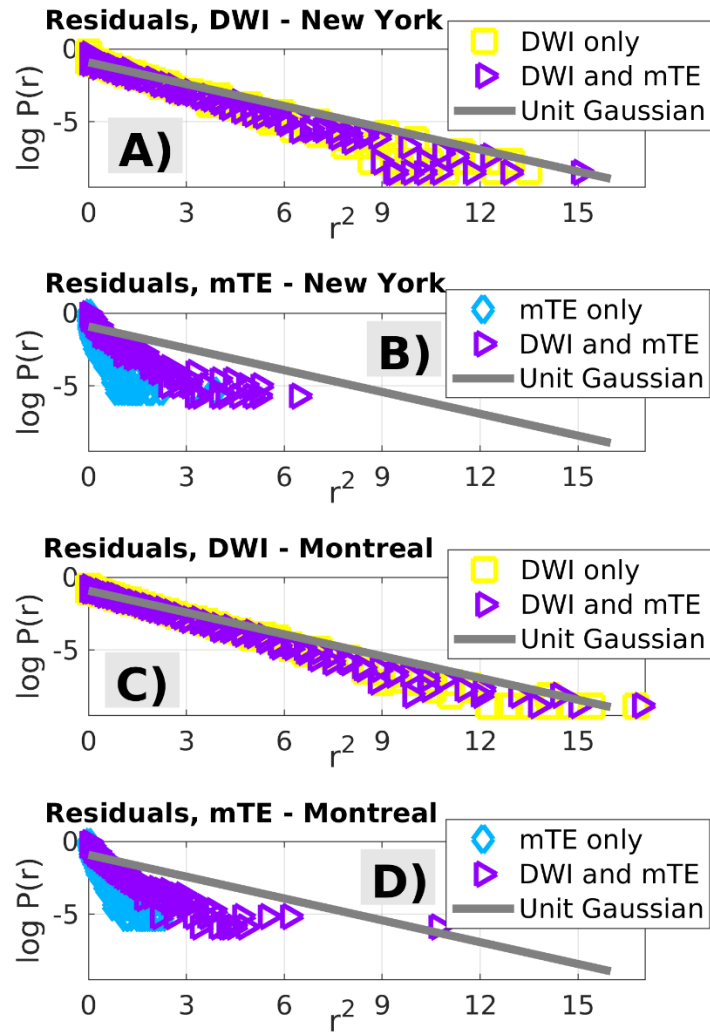

**Fig. S5.4.** Examples of distributions of residuals from in vivo data (vendor 2, two scanners – New York City and Montreal).
