# Supplementary material
Source: PubMed Central journal article supplement (PMC8564316)
Supplement: mmc7.pdf [file mmc7.pdf]

## Supplementary material S6 Difference maps

This document reports examples of voxel-wise differences in quantitative maps obtained with and without denoising. Supplementary figures S6.1, S6.2 and S6.3 respectively correspond to figures 5, 6 and 7 of the main manuscript.

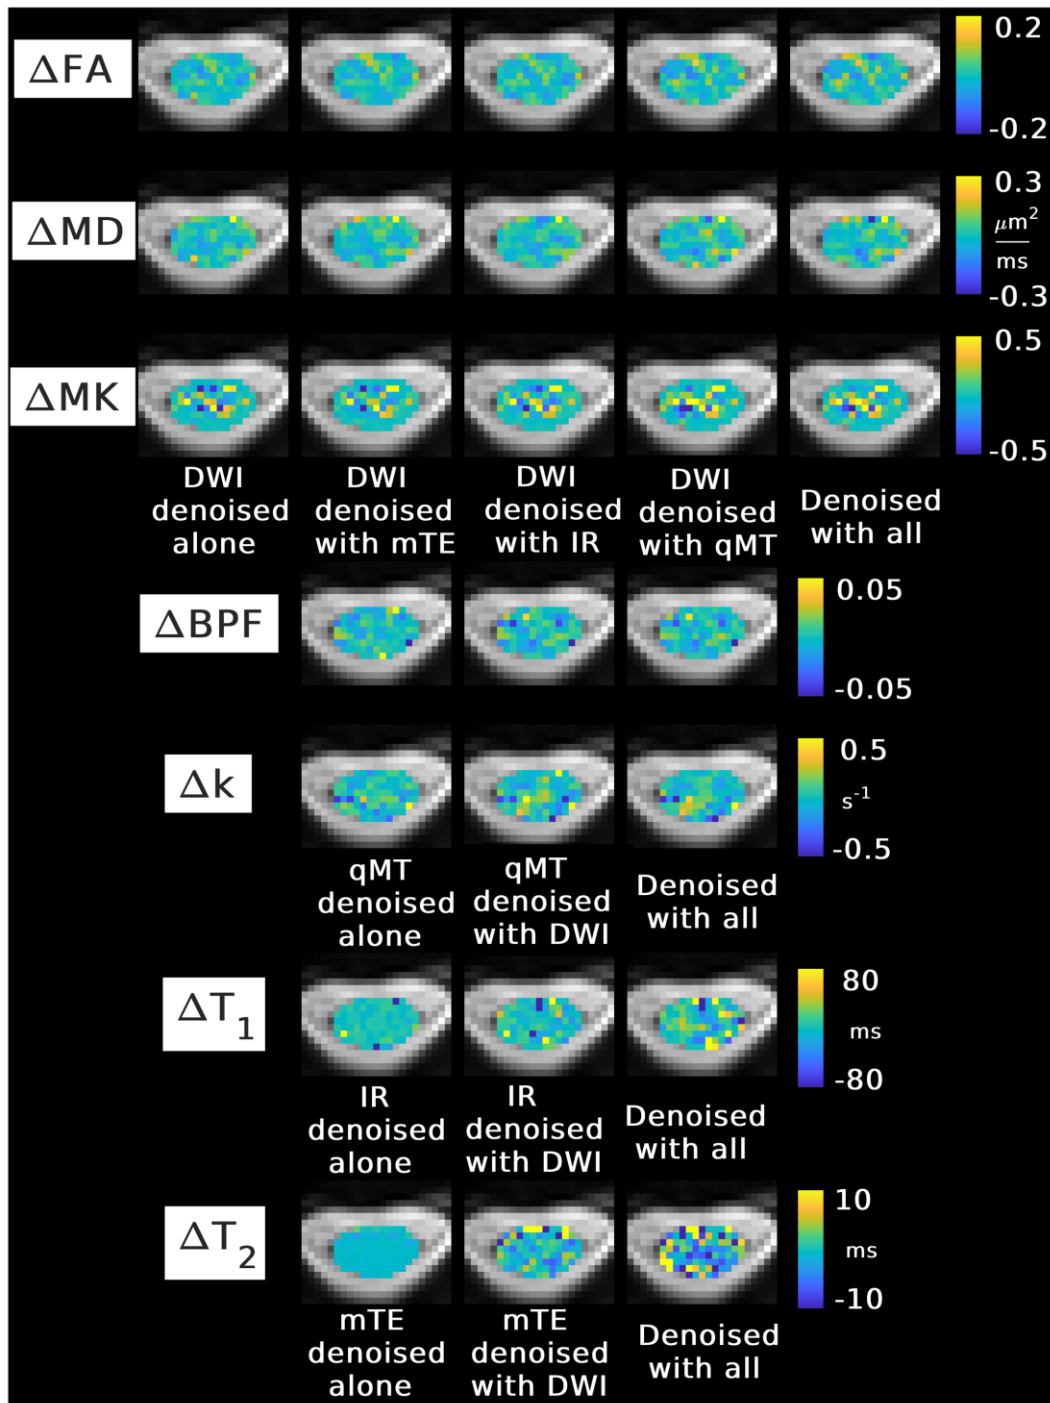

**Fig. S6.1.** Difference maps corresponding to figure 5 (vendor 1). Each plot shows the difference between a map obtained after denoising and the same map obtained without denoising ( $\Delta =$  denoising – no denoising).

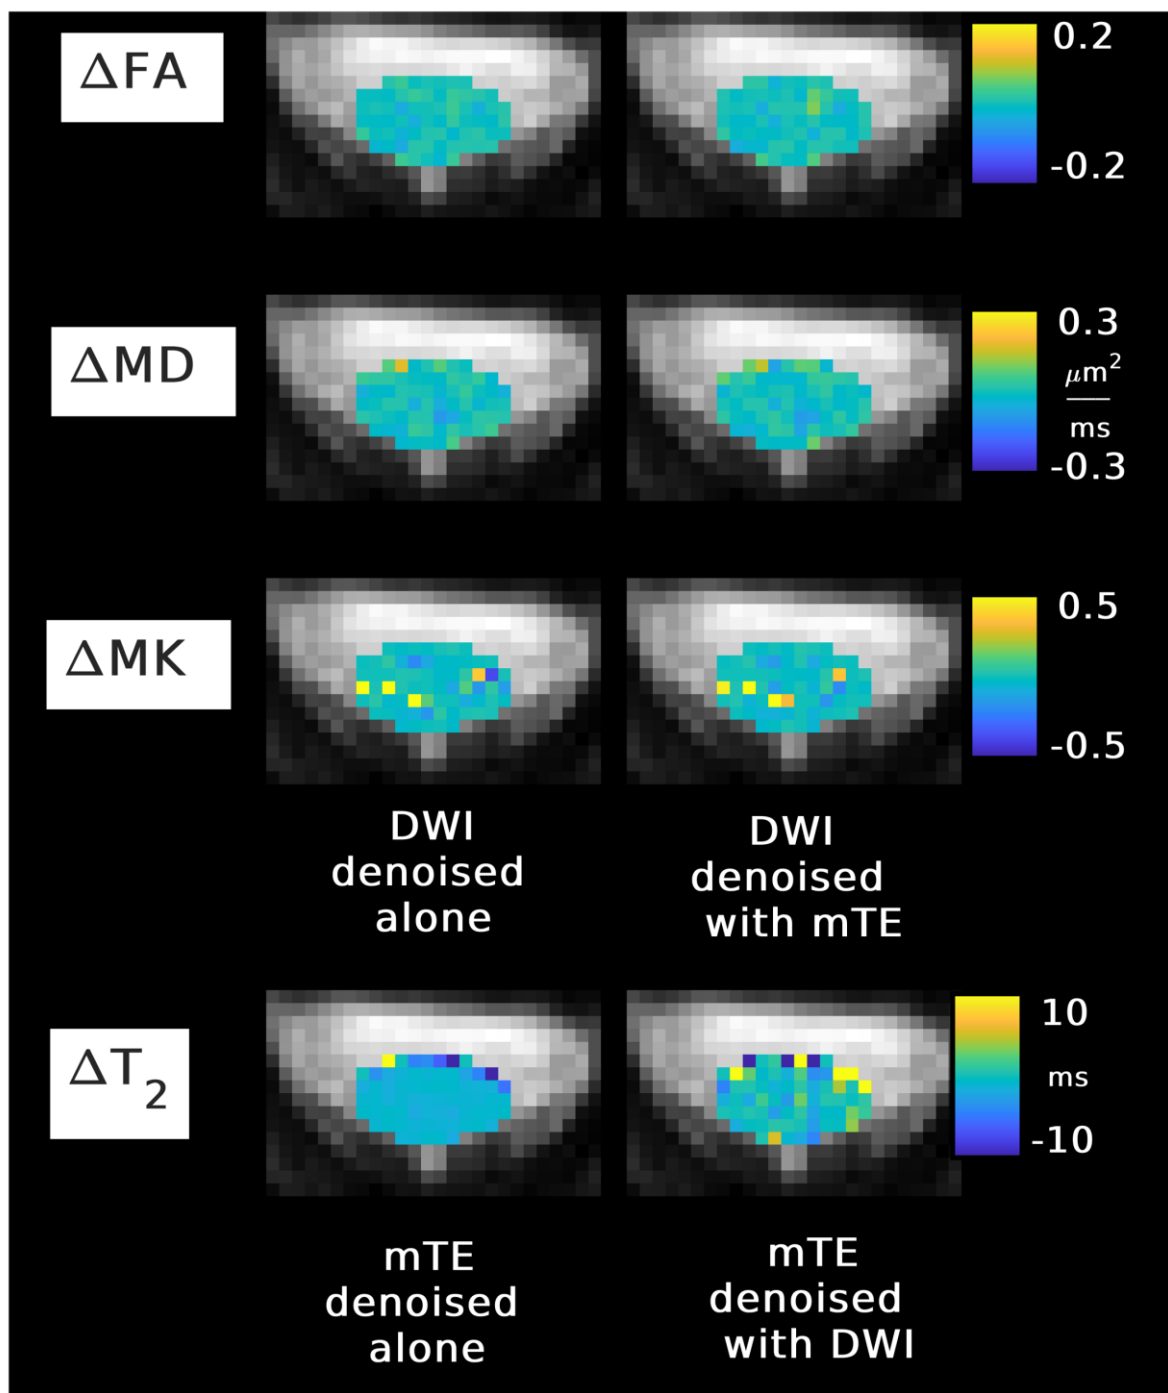

**Fig. S6.2.** Difference maps corresponding to figure 6 (vendor 2, New York). Each plot shows the difference between a map obtained after denoising and the same map obtained without denoising ( $\Delta =$  denoising – no denoising).

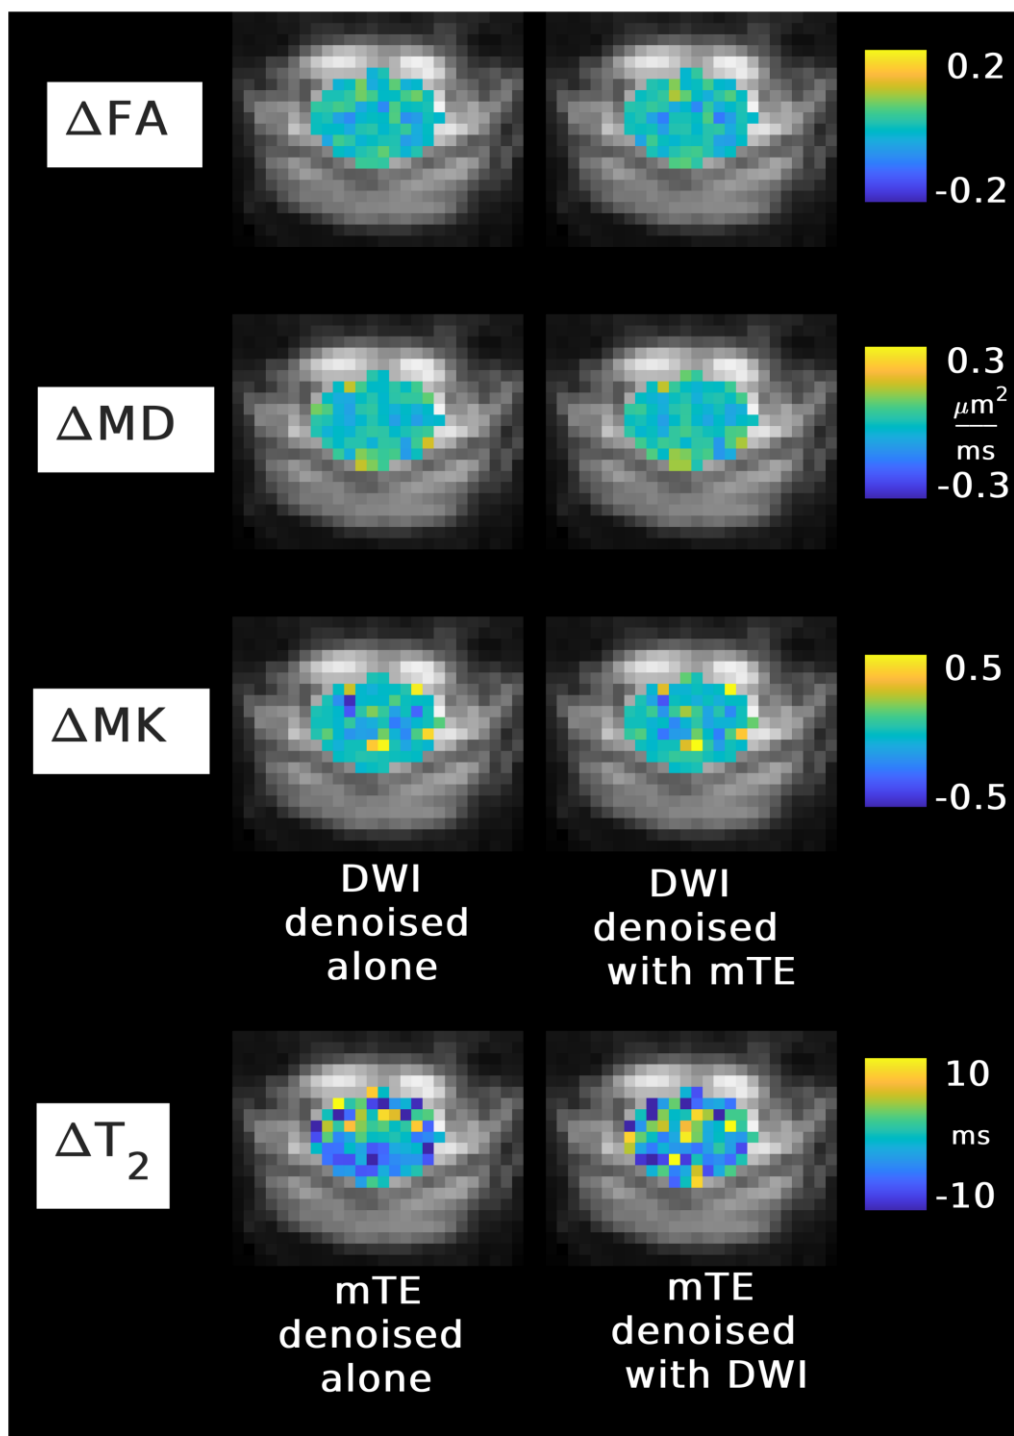

**Fig. S6.3.** Difference maps corresponding to figure 7 (vendor 2, Montreal). Each plot shows the difference between a map obtained after denoising and the same map obtained without denoising ( $\Delta$  = denoising – no denoising).
